# Supplementary material for: Impact of leadership behaviour on physician well-being, burnout, professional fulfilment and intent to leave: a multicentre cross-sectional survey study
Source: PubMed Central journal article supplement — BMJ Open. 2022 Jun 3;12(6):e057554. doi: 10.1136/bmjopen-2021-057554 (PMC9171269; doi:10.1136/bmjopen-2021-057554), 2022-06-03
Supplement: bmjopen-2021-057554.draft_revisions.pdf [file bmjopen-2021-057554.draft_revisions.pdf]

# BMJ Open

BMJ Open is committed to open peer review. As part of this commitment we make the peer review history of every article we publish publicly available.

When an article is published we post the peer reviewers' comments and the authors' responses online. We also post the versions of the paper that were used during peer review. These are the versions that the peer review comments apply to.

The versions of the paper that follow are the versions that were submitted during the peer review process. They are not the versions of record or the final published versions. They should not be cited or distributed as the published version of this manuscript.

BMJ Open is an open access journal and the full, final, typeset and author-corrected version of record of the manuscript is available on our site with no access controls, subscription charges or pay-per-view fees (<http://bmjopen.bmj.com>).

If you have any questions on BMJ Open's open peer review process please email [info.bmjopen@bmj.com](mailto:info.bmjopen@bmj.com)

# BMJ Open

## The impact of unit level leadership on physician wellbeing, burnout, professional fulfillment and intent to leave: a multi-center study.

|                               |                                                                                                                                                                                                                                                                                                |
|-------------------------------|------------------------------------------------------------------------------------------------------------------------------------------------------------------------------------------------------------------------------------------------------------------------------------------------|
| Journal:                      | <i>BMJ Open</i>                                                                                                                                                                                                                                                                                |
| Manuscript ID                 | bmjopen-2021-057554                                                                                                                                                                                                                                                                            |
| Article Type:                 | Original research                                                                                                                                                                                                                                                                              |
| Date Submitted by the Author: | 20-Sep-2021                                                                                                                                                                                                                                                                                    |
| Complete List of Authors:     | Mete, Mihriye; MedStar Health Research Institute; Georgetown University Medical Center, Department of Psychiatry<br>Goldman, Charlotte; MedStar Georgetown University Hospital, Shanafelt, Tait ; Stanford University, Medicine<br>Marchalik, Daniel; Georgetown University School of Medicine |
| Keywords:                     | Human resource management < HEALTH SERVICES ADMINISTRATION & MANAGEMENT, Organisational development < HEALTH SERVICES ADMINISTRATION & MANAGEMENT, Quality in health care < HEALTH SERVICES ADMINISTRATION & MANAGEMENT                                                                        |
|                               |                                                                                                                                                                                                                                                                                                |

SCHOLARONE™  
Manuscripts

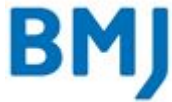

I, the Submitting Author has the right to grant and does grant on behalf of all authors of the Work (as defined in the below author licence), an exclusive licence and/or a non-exclusive licence for contributions from authors who are: i) UK Crown employees; ii) where BMJ has agreed a CC-BY licence shall apply, and/or iii) in accordance with the terms applicable for US Federal Government officers or employees acting as part of their official duties; on a worldwide, perpetual, irrevocable, royalty-free basis to BMJ Publishing Group Ltd ("BMJ") its licensees and where the relevant Journal is co-owned by BMJ to the co-owners of the Journal, to publish the Work in this journal and any other BMJ products and to exploit all rights, as set out in our [licence](#).

The Submitting Author accepts and understands that any supply made under these terms is made by BMJ to the Submitting Author unless you are acting as an employee on behalf of your employer or a postgraduate student of an affiliated institution which is paying any applicable article publishing charge ("APC") for Open Access articles. Where the Submitting Author wishes to make the Work available on an Open Access basis (and intends to pay the relevant APC), the terms of reuse of such Open Access shall be governed by a Creative Commons licence – details of these licences and which [Creative Commons](#) licence will apply to this Work are set out in our licence referred to above.

Other than as permitted in any relevant BMJ Author's Self Archiving Policies, I confirm this Work has not been accepted for publication elsewhere, is not being considered for publication elsewhere and does not duplicate material already published. I confirm all authors consent to publication of this Work and authorise the granting of this licence.

1  
2  
3 **Title:** The impact of unit level leadership on physician wellbeing, burnout, professional  
4 fulfillment and intent to leave: a multi-center survey study.  
5  
6  
7

8  
9  
10 \*Mihriye Mete, PhD<sup>1,2</sup>, Charlotte Goldman, MD<sup>3</sup>, \*\*Tait D. Shanafelt, MD<sup>4</sup>, \*\*Daniel  
11 Marchalik, MD<sup>3</sup>  
12  
13

14  
15  
16  
17 *Affiliations:*  
18

19  
20  
21 <sup>1</sup> MedStar Health Research Institute, Hyattsville, Maryland  
22

23  
24 <sup>2</sup> Department of Psychiatry, Georgetown University Medical Center  
25

26  
27 <sup>3</sup> Department of Urology, MedStar Health, MedStar Georgetown University Hospital  
28

29  
30 <sup>4</sup> Department of Medicine, Stanford University School of Medicine, Stanford, California  
31  
32

33  
34  
35  
36  
37 \*Corresponding Author:  
38

39  
40 Mihriye Mete, PhD  
41

42  
43 Director, Behavioral Health Research  
44

45  
46 MedStar Health Research Institute  
47

48  
49 Mihriye.mete@medstar.net  
50

51  
52 Words: 2981/3000  
53

54  
55  
56  
57  
58  
59  
60 \*\* Dr. Marchalik and Dr. Shanafelt are shared co-last authors.

1  
2  
3 **Author Contributions:** Dr. Mete had full access to all of the study data provided by  
4 PWAC and take responsibility for the integrity and the accuracy of the data analysis.  
5  
6

7  
8 Concept and design: Marchalik, Mete and Shanafelt.  
9

10  
11 Acquisition, analysis, or interpretation of data: Mete, Marchalik and Shanafelt  
12

13  
14 Drafting of the manuscript: Mete, Goldman  
15

16  
17 Critical revision of the manuscript for important intellectual content: Shanafelt,  
18 Marchalik, Goldman  
19

20  
21 Statistical analysis: Mete.  
22

23  
24 Administrative, technical, or material support: Marchalik, Mete  
25

26  
27  
28  
29  
30 The Corresponding Author has the right to grant on behalf of all authors and does grant  
31 on behalf of all authors, an exclusive license (or non exclusive for government  
32 employees) on a worldwide basis to the BMJ Publishing Group Ltd to permit this article  
33 (if accepted) to be published in BMJ editions and any other BMJ PGL products and  
34 sublicences such use and exploit all subsidiary rights, as set out in our license.  
35  
36

37  
38 Ethical Approval: not indicated.  
39

40  
41  
42  
43  
44 Transparency statement: Mihyre Mete affirms this manuscript is an honest, accurate  
45 and transparent account of the study being reports; no aspects have been omitted and  
46 all discrepancies have been explained.  
47  
48

49  
50 Funding information: None  
51

52  
53 Conflict of Interests: Dr. Shanafelt is coinventor of the Mayo Clinic Participatory  
54 Management Leadership Index and Well-being Index Instruments (Physician Well-being  
55  
56

1  
2  
3 Index, Medical Student Well-being Index, Nurse Well-being Index, Well-being Index).

4  
5 Mayo Clinic holds the copyright to these instruments and has licensed them for use

6  
7 outside of Mayo Clinic. Dr Shanafelt receives a portion of any royalties paid to Mayo

8  
9 Clinic. Dr Shanafelt reported receiving honoraria from grand rounds or keynote lecture

10  
11 presentations and advising for health care organizations outside the submitted work.

12  
13  
14 Other authors report no conflict of interest.

15  
16  
17 **Patient and Public Involvement:** Patients or the public were not involved in the

18  
19 design, conduct or reporting of our research.

**Summary Box:**

- More and more physicians are working in large organization or group practices, increasing the impact of work unit leadership in physician wellness
- Leadership has been identified as a risk factor for burnout and workplace satisfaction in limited previous studies.
- The relationship between leader behavior and physician wellbeing, professional fulfillment and their intent to leave their organizations has not been measured in a multi-center study.
- Physicians who ranked their supervisors in the top tertile of leadership demonstrated 5.8x higher odds of professional fulfillment, 50% less burnout, and 66% lower intention to leave their jobs than those who ranked their supervisors in the lowest tertile.
- Our large multicenter study demonstrates that leadership behavior is strongly associated with physicians' professional fulfillment, burnout and intent to leave their organizations.

**Abstract:**

**Objective:** To examine how perceived leadership behaviors affect burnout, professional fulfillment and intent to leave the organization among physicians.

**Design:** Anonymous cross-sectional survey study from November 2016 to October 2018.

**Setting:** 12,036 attending and resident physicians at eleven healthcare organizations participating in the Physician Wellness Academic Consortium (PWAC) were surveyed to assess burnout and professional fulfillment and their drivers.

**Participants:** A sample of 5416 attending physicians with complete data on gender, specialty, leadership, sleep, burnout and professional fulfillment.

**Main Outcomes and Measures:** The leadership behavior of each physician's supervisor was assessed using the Mayo Clinic Participatory Management Leadership Index and categorized in tertiles. Multivariable logistic regression analyses examined the effect of leadership behavior rating of each physician's supervisor on burnout, professional fulfillment, and intent to leave controlling for sleep impairment, gender, and specialty.

**Results:** The response rate was 45% across 11 institutions. Half of respondents were female. Professional fulfillment increased with increasing tertiles of leadership behavior rating (19%, 34%, 47%  $p < 0.001$ ). The odds of professional fulfillment were 5.8 times higher (95%CI 5.1-6.59) for physicians in the top tertile compared to those in the lowest tertile. Physicians in the top tertile were also 50% less likely to be burned out (95%CI 0.42-0.60) and reported 66% lower intent to leave (95% CI 0.26-0.44). Individuals who rated their supervisor's leadership in upper tertiles relative to lower tertiles exhibited



1  
2  
3 lower levels of sleep related impairment (24% vs 38% vs 38%  $P<0.001$ ), burnout (18%  
4 vs 35% vs 47%  $p<0.001$ ), and intent to leave (16% vs 24% vs 50%  $p<0.001$ ).  
5  
6

7 **Conclusion:** Perceived leadership behaviors have a strong relationship with burnout,  
8 professional fulfillment, and intent to leave among physicians. Organizations should  
9  
10 consider leadership development as a potential vehicle to improve physician wellness  
11  
12  
13 and prevent costly physician departures.  
14  
15

16  
17  
18  
19 Abstract word count: 290  
20  
21

22  
23  
24 Keywords: burnout, leadership, gender, professional fulfillment  
25  
26  
27  
28

### 29 **Strengths and Limitations of this Study:**

- 30  
31 • First multi-center study to our knowledge of physician well being on professional  
32 fulfillment and intention to leave  
33
- 34 • Multi-specialty study of physicians from 11 healthcare organizations  
35
- 36 • Validated instruments used to assess burnout professional fulfillment, sleep and  
37 leadership behavior  
38
- 39 • Response rate of 45% with possibility for response and recall bias  
40  
41  
42  
43  
44  
45  
46  
47  
48  
49  
50  
51  
52  
53  
54  
55  
56  
57  
58  
59  
60

## INTRODUCTION

As the landscape of modern medicine continues to grow and change, physicians are increasingly becoming employed by large organizations.<sup>1</sup> Solo or small practices are becoming less common, and up to two thirds of physicians are now employed by large practice groups and 20% of physicians employed by a practice of greater than 100 physicians.<sup>2</sup> The trend to group medicine exists beyond the boundaries of academic medicine or private practice, including university hospitals, health maintenance organizations, practice groups, and health systems.

Healthcare organizations have increasingly recognized the impact of occupational burnout and physician well-being on their ability to provide high quality healthcare to their communities.<sup>3</sup> The components of burnout include emotional exhaustion (EE), depersonalization, and decreased personal efficacy in the context of the work environment.<sup>4</sup> Concern for physician burnout has gained increasing attention given its implications for patient and provider health. Burnout has previously been associated with worse quality of care,<sup>5-7</sup> physician attrition,<sup>8-10</sup> patient satisfaction,<sup>11-13</sup> cost of care,<sup>3,14-15</sup> and medical errors.<sup>6,16-17</sup> Institutional factors involved in burnout and professional fulfillment act as modifiable factors that can be targeted by organizations.<sup>18-</sup>

23

The impact of leadership effectiveness on burnout and workplace satisfaction for physicians is of importance for healthcare organizations.<sup>24-26</sup> A study of 2800 physicians

1  
2  
3 at the Mayo Clinic demonstrated that average leadership behavior score of physicians  
4 work unit supervisor explained 11% of the variation in burnout and 47% of the variation  
5 in workplace satisfaction across 129 work units when adjusted for other factors.<sup>24</sup> The  
6 leadership behaviors of physicians immediate supervisor have also been found to have  
7 a strong impact on physicians' perception of values alignment with their organization as  
8 a whole.<sup>26</sup> Healthcare leaders face many challenges, balancing costs with ever  
9 changing reimbursements, managing personnel, and addressing dynamic quality  
10 metrics.<sup>27</sup> However, physician training is largely focused on the individual, with an  
11 emphasis on clinical care of patients. Developing leadership skills in physician  
12 supervisors, organizations can make a large impact in the wellbeing of their clinicians  
13 and foster better patient care.<sup>18, 25,28-29</sup> Additionally, by understanding and targeting  
14 leadership, organizations can impact a large number of healthcare professionals and  
15 teams under each leader's supervision. We sought to further evaluate the factors  
16 involved in physician burnout by understanding the relationship between leadership,  
17 burnout, profession fulfillment, and intent to leave.

## 41 METHODS:

42  
43  
44 The standardized survey administered to participating institutions included the  
45 Professional Fulfillment Index (PFI), the Patient Reported Outcomes Measurement  
46 Information System (PROMIS) Sleep-Related Impairment Scale. Data for this analysis  
47 was collected between November 2016 and October 2018. The dataset was de-  
48 identified by a third-party administrator prior to analysis. The results of the analyses for  
49 this study are based on a sample of 5416 physicians from 11 healthcare organizations

1  
2  
3 participating in the Physician Wellness Academic Consortium (PWAC-  
4 <https://wellbeingconsortium.org>) who provided complete data on gender, specialty,  
5  
6 leadership, sleep-related impairment, burnout and professional fulfillment.  
7  
8  
9  
10  
11  
12

### 13 Measures

14  
15  
16 *Leadership Evaluation:* Participants were asked to evaluate their leader using the  
17 organizational leadership subscale based on the revised 9-item Mayo Clinic  
18 Participatory Management Leadership Index (used with permission from Mayo Clinic).<sup>25</sup>  
19  
20 This instrument was designed to evaluate leadership behaviors associated with team  
21 member engagement, including dimensions related to inclusion (treating everyone with  
22 respect), keeping people informed, soliciting input, empowering team members,  
23 nurturing professional development, and providing feedback and recognition. Each item  
24 is scored on a 5-point scale (0-4) and the scores from the individual items are summed  
25 to compute an aggregate score (with higher scores indicating more favorable ratings).  
26  
27 The total score was then categorized into tertiles to represent groups of participants'  
28 leadership scores in increasing order.  
29  
30  
31  
32  
33  
34  
35  
36  
37  
38  
39  
40  
41  
42

43 *Professional Fulfillment Index:* The PFI was used to measure professional fulfillment  
44 and burnout. The PFI includes 6 items for the assessment of professional fulfillment, 4  
45 items for the assessment of work exhaustion and 6 items to assess interpersonal  
46 disengagement. The burnout score represents the mean of 10 work exhaustion and  
47 interpersonal disengagement items, scored on a Likert scale from 0 (not at all) to 4  
48 (extremely), where 4 indicates the highest burnout score. The professional fulfillment  
49  
50  
51  
52  
53  
54  
55  
56  
57  
58  
59  
60

1  
2  
3 scale assesses the degree of intrinsic positive reward the individual derives from their  
4 work, including happiness, meaningfulness, contribution, self-worth, satisfaction, and  
5 feeling in control when dealing with difficult problems at work. Items are measured on a  
6 five-point Likert scale from 0 (not at all true) to 4 (completely true). The mean score  
7 represents the mean of all 6 items and ranges between 0 and 4. Burnout score and  
8 professional fulfillment scores were rescaled to be between 0 and 10 to make  
9 interpretations simpler and consistent with recent reports.<sup>25-26,30</sup> Based on the published  
10 validation studies,<sup>31-32</sup> the established thresholds for burnout and professional fulfillment  
11 on the 0-10 scales are  $\geq 3.25$  and  $\geq 7.5$  respectively.  
12  
13  
14  
15  
16  
17  
18  
19  
20  
21  
22  
23

24 *PROMIS Sleep-Related Impairment Scale*: PROMIS short-form Sleep-Related  
25 Impairment (8a) includes 8 items measured on a 5-point Likert scale on perception of  
26 alertness, sleepiness, tiredness and perceived functional impairments during waking  
27 hours associated with sleep problems. The total score ranges between 8 and 40 where  
28 40 indicates highest sleep impairment level. Sleep-related impaired status is considered  
29 to be present when the total score is equal to or higher than 16.<sup>33-34</sup>  
30  
31  
32  
33  
34  
35  
36  
37  
38

39 *Intent to Leave*: Participants were asked if they intended to leave their institution within  
40 two years (*What is the likelihood that you will leave your institution within two years?*).  
41 The response choices were none, slight, moderate, likely, and definitely. The responses  
42 were then collapsed to form a binary variable (0=none, 1 otherwise) indicating that the  
43 participants have at least "slight" likelihood of leaving.  
44  
45  
46  
47  
48  
49  
50

## 51 **Statistical Analyses**

52  
53  
54  
55  
56  
57  
58  
59  
60

Data were summarized for the overall sample (Table 1) and by tertiles of the leadership behavior score using frequencies and percentages for categorical variables (Table 2).

**Table 1. Characteristics of the Respondents**

| Total N=5,416                               | N (%)      |
|---------------------------------------------|------------|
| Gender                                      |            |
| <i>Female</i>                               | 2710 (50)  |
| Male                                        | 2706 (50)  |
| <i>Specialty</i>                            |            |
| Anesthesiology                              | 407 (7.5)  |
| Dermatology                                 | 71 (1.3)   |
| Emergency Medicine                          | 322 (6.0)  |
| Medicine                                    | 1671(30.9) |
| Neurology                                   | 195 (3.6)  |
| OB-GYN                                      | 248 (4.6)  |
| Pathology                                   | 140 (2.6)  |
| Pediatrics                                  | 804 (14.9) |
| Psychiatry                                  | 136 (2.5)  |
| Radiation Oncology                          | 77 (1.4)   |
| Radiology                                   | 317 (5.9)  |
| Surgery                                     | 630 (11.6) |
| Missing Specialty                           | 398 (7.3)  |
| <i>Occupational Distress and Well-being</i> |            |
| Sleep related impairment                    |            |
| Mean score (0-10) (SD) <sup>1</sup>         | 4.4 (1.7)  |
| Sleep-Related Impairment present (yes)      | 2619 (48)  |

|                                                       |           |
|-------------------------------------------------------|-----------|
| Professional fulfillment                              |           |
| Mean score (0-10) (SD) <sup>2</sup>                   | 6.6 (2.1) |
| Professional Fulfillment Present (yes)                | 2280 (42) |
| Burnout                                               |           |
| Mean score (0-10) (SD) <sup>1</sup>                   | 3.0 (1.9) |
| Burned Out (yes)                                      | 2174 (40) |
| Intent to Leave Current Organization within Two Years | 1694 (32) |

<sup>1</sup> higher score unfavorable

<sup>2</sup> higher score favorable

**Table 2. Characteristics of the Respondents by the Tertiles of Unit-Level Leadership Ratings**

| Total N=5,416      | Tertile of Leadership Behavior Score <sup>1</sup> |                        |                       |                         |
|--------------------|---------------------------------------------------|------------------------|-----------------------|-------------------------|
|                    | Tertile 1<br>N (row %)                            | Tertile 2<br>N (row %) | Tertile 3<br>N(row %) | p-value<br>(Chi-square) |
| Sex                |                                                   |                        |                       |                         |
| Female             | 994 (37)                                          | 972 (36)               | 744 (28)              | <0.001                  |
| Male               | 824 (31)                                          | 987 (37)               | 895 (33)              |                         |
| Specialty          |                                                   |                        |                       |                         |
| Anesthesiology     | 156 (38)                                          | 154 (38)               | 97 (24)               |                         |
| Dermatology        | 10 (14)                                           | 21 (30)                | 40 (56)               |                         |
| Emergency Medicine | 66 (21)                                           | 144 (45)               | 112 (35)              |                         |

|                                        |           |           |           |        |
|----------------------------------------|-----------|-----------|-----------|--------|
| Medicine                               | 625 (37)  | 593 (36)  | 453 (27)  | <0.001 |
| Neurology                              | 51 (26)   | 72 (37)   | 72 (37)   |        |
| OB-GYN                                 | 98 (40)   | 83 (34)   | 67 (27)   |        |
| Pathology                              | 32 (23)   | 51 (36)   | 57 (41)   |        |
| Pediatrics                             | 241 (30)  | 306 (38)  | 257 (32)  |        |
| Psychiatry                             | 43 (32)   | 44 (32)   | 49 (36)   |        |
| Radiation Oncology                     | 23 (30)   | 29 (38)   | 25 (33)   |        |
| Radiology                              | 89 (28)   | 114 (36)  | 114 (36)  |        |
| Surgery                                | 214 (34)  | 209 (33)  | 207 (33)  |        |
| Missing Specialty                      | 170 (43)  | 139 (35)  | 89 (22)   |        |
| Sleep-Related Impairment               |           |           |           |        |
| Mean score (0-10) (SD) <sup>2</sup>    | 4.6 (1.8) | 4.4 (1.7) | 4.0 (1.5) | <0.001 |
| Sleep-Related Impairment present (yes) | 997(38)   | 990 (38)  | 632 (24)  | <0.001 |
| Professional Fulfillment               |           |           |           |        |
| Mean score (0-10) (SD) <sup>3</sup>    | 5.6 (2.1) | 6.7 (1.8) | 7.7 (1.8) | <0.001 |
| Professional Fulfillment Present (yes) | 438 (19)  | 779 (34)  | 1063(47)  | <0.001 |
| Burned Out                             |           |           |           |        |



|                                     |           |           |           |        |
|-------------------------------------|-----------|-----------|-----------|--------|
| Mean score (0-10) (SD) <sup>2</sup> | 3.7 (2.0) | 3.0 (1.7) | 2.2 (1.7) | <0.001 |
| Burned Out (yes)                    | 1010(47)  | 766 (35)  | 398 (18)  | <0.001 |
| Intent to Leave (yes)               | 851 (50)  | 578 (34)  | 265 (16)  | <0.001 |

<sup>1</sup> higher tertile favorable <sup>2</sup> higher score unfavorable

<sup>3</sup> higher score favorable

The association between leadership behavior score and variables of interests were statistically tested using Chi-square and trend tests presented in Table 2. Linear associations between continuous variables and leadership ratings were examined using correlation coefficients. Internal validity of the organizational leadership scale was assessed using Cronbach's alpha. Multivariable logistic regression analyses were conducted to examine the association between the leadership behavior score of each physician's supervisor and burnout and intent to leave controlling for sleep impairment, gender, professional fulfillment and specialty. The correlation within specialty groups was accounted for using clustering at specialty level (logistic command with cluster option in Stata 15). Estimated odds ratios with 95% confidence intervals and p-values were presented in Table 3. Predictive margins over leadership scale tertiles were computed based on the logistic regression models for male and female physicians and presented in Figures 1 and 2. All statistical analyses were conducted in Stata 15. A p-value of <.05 was considered statistically significant.

### **Table 3. Logistic Regression Models of Professional Fulfillment, Burnout and Intent to Leave**

|                                           | Model 1<br>Professional<br>Fulfillment (yes)<br><br>N=5416 | Model 2<br>Burnout<br>Status (yes)<br><br>N=5416 | Model 3<br>Intent to<br>Leave (yes)<br><br>N=5374 |
|-------------------------------------------|------------------------------------------------------------|--------------------------------------------------|---------------------------------------------------|
| Variables                                 | Odds Ratio<br>(95% CI) (p-val)                             | Odds Ratio<br>(95% CI) (p-<br>val)               | Odds Ratio<br>(95% CI) (p-<br>val)                |
| Female vs Male                            | 0.60 (0.52-0.69)<br>( $<0.001$ )                           | 1.55 (1.38-<br>1.74)<br>( $<0.001$ )             | 0.70 (0.60-<br>0.83)<br>( $<0.001$ )              |
| Leadership Score Tertile 1                | Reference                                                  | Reference                                        | Reference                                         |
| Tertile 2                                 | 2.07 (1.82-2.36)<br>( $<0.001$ )                           | 0.51 (0.43-<br>0.60)<br>( $<0.001$ )             | 0.56 (0.48-<br>0.65)<br>( $<0.001$ )              |
| Tertile 3                                 | 5.40 (4.72-6.19)<br>( $<0.001$ )                           | 0.29 (0.25-<br>0.33)<br>( $<0.001$ )             | 0.34 (0.26-<br>0.44)<br>( $<0.001$ )              |
| Sleep-Related Impairment<br>(yes)         | 0.36 (0.33-0.38)<br>( $<0.001$ )                           | 5.68 (4.76-<br>6.78)<br>( $<0.001$ )             | 1.14 (0.93-<br>1.39)<br>(0.224)                   |
| Professional Fulfillment<br>Present (yes) | -----                                                      | -----                                            | 0.46 (0.40-<br>0.52)<br>( $<0.001$ )              |
| Burned out vs Not                         | -----                                                      | -----                                            | 2.32 (2.10-<br>2.56)<br>( $<0.001$ )              |
| Area under the curve (ROC)                | 0.75                                                       | 0.77                                             | 0.74                                              |

## RESULTS

A total of 12036 attending and resident physicians across 11 institutions were surveyed between November 2016 and October 2018 as part of their membership in the Physician Wellness Academic Consortium. Among these, 5795 attendings completed evaluation of their work unit leader using the 9-item version of the Mayo Clinic Participatory Management Leadership Index. The sample size for the present study was based on the number of attending physicians with complete data on gender, specialty, leadership rating scale, sleep-related impairment, burnout and professional fulfillment. The overall attending physician response rate for the PWAC survey was 45%. The personal and professional characteristics of responders are shown in Table 1. Table 2 presents data on the relationships between specialty distribution, burnout, professional fulfillment, sleep-related impairment, and intent to leave by the tertiles of the scores on the Participatory Management Leadership Index, which showed high internal consistency (Cronbach's  $\alpha=0.95$ ) in this sample.

Female physicians represented 50% (2710/5416) of all participants. The percentage of female physicians who rated their immediate supervisor in the highest tertile of the leaderships scale was significantly lower than male physicians (28% vs 33%  $p<0.001$ ). By specialty, Dermatologists (56%) and Pathologists (41%) had the highest proportion who rated their immediate supervisor in the highest tertile of the leadership behavior. In contrast, Ob-Gyn specialists (40%), Anesthesiologists (38%) and Internal Medicine physicians (31%) were least likely to rate their immediate supervisor in the highest tertile of the leaderships scale.

1  
2  
3 The leadership behavior rating of each physician's supervisor was negatively  
4 associated with burnout score ( $r=-0.34$ ,  $p<0.001$ ) and positively associated with  
5 professional fulfillment score ( $r=0.44$ ,  $p<0.001$ ). There was a significant positive  
6 association between professional fulfillment and leadership behavior score. Mean  
7 professional fulfillments scores (4.6, 4.4, 4.0,  $p<0.001$ ) and the percentage of those with  
8 professional fulfillment were higher at higher tertiles of leadership behavior scores  
9 (lowest tertile: 19%, middle tertile: 34% and highest tertile: 47%,  $p<0.001$ ). The mean  
10 burnout score (3.7, 3.0, 2.2,  $p<0.001$ ) and percentage of physicians who had a high  
11 burnout score decreased with increasing tertiles of leadership behavior score (47%,  
12 35% and 18%,  $p<0.001$ ). Similarly, the percentage of those who reported an intent to  
13 leave their institution in the next two years decreased with increasing tertiles of  
14 leadership behavior score (50%, 34% and 16%,  $p<0.001$ ). Physicians with sleep related  
15 impairment were less likely to rate their immediate supervisor in the highest tertile of the  
16 leaderships scale (24% vs 38% in lower tertiles,  $p<0.001$ ).

17  
18  
19  
20  
21  
22  
23  
24  
25  
26  
27  
28  
29  
30  
31  
32  
33  
34  
35  
36  
37  
38  
39 Table 3 presents multivariable logistic regression models of professional fulfillment  
40 (Model 1), burnout status (Model 2) and intent to leave (Model 3) in relation to  
41 leadership behavior rating of physician's supervisor. The strong association between  
42 professional fulfillment and leadership behavior score is demonstrated in Model 1.  
43  
44  
45  
46  
47  
48  
49  
50  
51  
52  
53  
54  
55  
56  
57  
58  
59  
60  
Physicians who have more favorable evaluations of their leaders were more likely to be  
in the professionally fulfilled category. Specifically, the odds of having high professional  
fulfillment increased by a factor of 2.1 for those who rated their leader in the second  
tertile compared to those in the lowest tertile (OR:2.07, 95% CI: 1.82-2.36) while the

1  
2  
3 odds increased by a factor of 5.4 for those who are in the top tertile compared to those  
4  
5 in the lowest tertile (OR:5.40, 95% CI:4.72--6.19, AUC 0.75). This model also  
6  
7 demonstrates that female physicians were significantly less likely to have high  
8  
9 professional fulfillment after adjusting for specialty, sleep-related impairment and  
10  
11 supervisor leadership behavior rating (OR:0.60, 95% CI: 0.52-0.69). Figure 1 illustrates  
12  
13 the likelihood of having professional fulfillment for leadership behavior tertile of  
14  
15 physician's supervisor for female and male physicians based on the predicted  
16  
17 probabilities obtained from Model 1. Non-overlapping confidence intervals at each tertile  
18  
19 show that the difference between gender groups is maintained across tertiles  
20  
21 suggesting that the association between of leadership score on professional fulfillment  
22  
23 is not dependent on gender. This is evidenced by non-significant interaction effects  
24  
25 between gender and leadership behavior score tertiles in Model 1 when interaction  
26  
27 terms are included.  
28  
29  
30  
31  
32

33  
34 The relationship between organizational leadership and physician burnout is assessed  
35  
36 in Model 2, which is adjusted by gender, specialty, sleep-related impairment and  
37  
38 professional fulfillment. Physicians who rated the leader behavior of their supervisor in  
39  
40 the second tertile were 49% less likely to be burned out compared to those who are in  
41  
42 the first tertile (OR:0.51, 95% CI:0.43-0.60); those who are in the top tertile of leadership  
43  
44 behavior score were 71% less likely to be burned out compared to those who are in the  
45  
46 first tertile (OR:0.29, 95% CI:0.25-0.33). Model 2 also showed that the odds of reporting  
47  
48 burnout are 55% higher for female physicians (OR:1.55 95% CI: 1.38-1.74), and  
49  
50 approximately 6 times higher for those with sleep-related impairment (OR:5.68, 95%  
51  
52 CI:3.4.76-6.78, AUC 0.77). The likelihood of burnout derived from Model 2 by the tertiles  
53  
54  
55  
56  
57  
58  
59  
60

1  
2  
3 of leadership behavior score of supervisor is illustrated for male and female physicians  
4 in behavior score Figure 2. The gender differences in burnout by increasing tertiles of  
5 leadership behavior score remained similar across tertiles indicated by non-overlapping  
6 confidence intervals at each tertile and non-significant interactions between gender and  
7 leadership behavior score tertiles in Model 2.  
8  
9  
10  
11  
12  
13

14  
15  
16  
17  
18 Model 3 estimates the effect of leadership behavior rating of each physician's  
19 supervisor on the likelihood that a physician intent to leave their institution within the  
20 next two years. This model is adjusted by gender, specialty, sleep-related impairment,  
21 burnout and professional fulfillment status as potential confounders of intent to leave.  
22  
23 Physicians who rated the leader behavior of their supervisor in the second tertile were  
24 44% less likely to report an intent to leave compared to those who were in the first tertile  
25 (OR:0.56, 95% CI:0.48-0.65); those who were in the top tertile of supervisor leadership  
26 behavior score are 66% less likely to intend to leave compared to those who were in the  
27 first tertile (OR:0.34, 95% CI:0.26-0.44). Model 3 also shows that the odds of reporting  
28 intent to leave were 30% lower for female physicians (OR:0.70 95% CI: 0.60-0.83) and  
29 54% lower for those with high professional fulfillment (OR:0.46, 95% CI:0.40-0.52). The  
30 area under the ROC curve for this model is 0.74. The likelihood of having intent to leave  
31 for male and female physicians in this model by the tertiles of supervisor leadership  
32 behavior score is shown in Figure 3. Fifty percent (95% CI: 47-53) of male physicians  
33 and 45% (95% CI: 42-48) of female physicians in the lowest tertile of leadership  
34 behavior score reported an intent to leave in two years compared to 17% of male  
35 physicians and 16% of female physicians in the top tertile. The difference between the  
36  
37  
38  
39  
40  
41  
42  
43  
44  
45  
46  
47  
48  
49  
50  
51  
52  
53  
54  
55  
56  
57  
58  
59  
60

1  
2  
3 gender groups in the top tertile is significantly narrower compared to that in the lower  
4  
5 tertile evidenced by a statistically significant interaction term (genderXtertile3, OR=0.70,  
6  
7 95% CI: 0.52-0.94, p=0.02) when interaction terms are included.  
8  
9

## 10 11 12 13 DISCUSSION

14  
15  
16 This multi-institution study demonstrates a strong relationship between leadership  
17  
18 evaluations and burnout, professional fulfillment and intent to leave current organization  
19  
20 among US physicians. These results are consistent with previous single center studies  
21  
22 which have demonstrated the significant impact of leadership quality on healthcare  
23  
24 professional burnout and professional fulfillment.<sup>24-26,35</sup> The association between  
25  
26 leadership and burnout remains strong even when we control for professional fulfillment,  
27  
28 which has a well-established strong inverse relationship with burnout.<sup>36</sup> Although the  
29  
30 present study looks at the correlation between individuals' rating of the leadership  
31  
32 behavior of their supervisor and their own well-being and professional fulfillment,  
33  
34 previous studies have also found a strong relationship between the composite  
35  
36 leadership behavior score of a leader (as assessed by all individuals reporting to them)  
37  
38 and the risk of burnout and professional fulfillment for the members of the team as a  
39  
40 whole.<sup>24-26</sup> Leader behavior score also had a strong relationship with intent to leave.  
41  
42  
43 These results are consistent with the notion that physicians who are dissatisfied with  
44  
45 their supervisor' ability to lead the team are the more likely to consider other  
46  
47  
48 opportunities. Prior studies demonstrated physicians who report intent to leave are three  
49  
50  
51 times more likely to actually leave their institution in the next two years.<sup>8,9,37</sup> This is  
52  
53  
54  
55  
56  
57  
58  
59  
60

1  
2  
3 especially important as the cost of replacing physicians is significant, and turnover and  
4  
5 burnout can be associated with lower quality and higher cost care for patients.<sup>3, 48-42</sup>  
6  
7 Notably, in our study, a lower percentage of female physicians rated the leadership  
8  
9 behaviors of their supervisor in the top tertile and a higher percentage rated the  
10  
11 behaviors of their supervisor in the lowest tertile. Previous studies have indicated  
12  
13 female physicians report greater workplace bullying, harassment, gender  
14  
15 discrimination, and feelings of isolation.<sup>43-51</sup> While female physicians are no longer a  
16  
17 minority in the profession as a whole, they are often underrepresented in leadership,  
18  
19 potentially due to inequality and bias in the opportunity for promotion and reward.<sup>7, 43-46,</sup>  
20  
21  
22  
23  
24 <sup>52</sup> This also results in fewer female leaders serving as mentors and role models, which  
25  
26 may be protective against burnout. <sup>44, 47-49, 52</sup>  
27  
28

29 Interestingly, in our adjusted analysis controlling for burnout, professional fulfillment,  
30  
31 and the behavior score of their leader, female physicians reported less intent to leave  
32  
33 than male physicians (OR 0.7 CI 0.59-0.83 p<0.001). This is in contrast to prior studies  
34  
35 demonstrating a 8-10% higher attrition rate in female physicians.<sup>37, 45,51</sup> These  
36  
37 observations are consistent with the possibility that higher attrition rates among women  
38  
39 physicians may be due to lower satisfaction with their leader and higher rates of  
40  
41 burnout. Because intention to leave describes a longer-term plan to change jobs, it is  
42  
43 also possible that female physicians may leave their jobs more suddenly.  
44  
45  
46  
47

48 Investing in the leadership development of supervising physicians maybe an important  
49  
50 strategy to mitigate burnout and promote professional fulfillment in physicians. An  
51  
52 integrative model of Wellness-Centered Leadership (WCL) incorporating the critical  
53  
54 skills and leadership behaviors that cultivate engagement and professional fulfillment  
55  
56  
57  
58  
59  
60



1  
2  
3 was recently published.<sup>53</sup> When selecting and developing clinician leaders, the  
4 importance of emotional intelligence, social awareness and team communication should  
5 be considered.<sup>27</sup> These are skills that can be developed in physicians in training,  
6 beginning in medical school and continuing through all phases of training, including  
7 communication, mindfulness and reflection.<sup>18, 54-55</sup> Leaders' own well-being impacts  
8 their leadership effectiveness. One recent study demonstrated that 9.8% of the variation  
9 in a leader's leadership behavior scores as assessed by physicians on their team was  
10 related to their own independently assessed degree of burnout.<sup>25</sup> This observation  
11 suggests that burnout among leaders may result in sub-optimal leadership behavior  
12 which in turn increase the risk of burnout in their team members creating a vicious  
13 cycle. This finding suggest that leadership development initiatives should include  
14 attention to the well-being of the leader in addition to cultivation of specific leadership  
15 skills.<sup>53</sup>

16  
17  
18  
19  
20  
21  
22  
23  
24  
25  
26  
27  
28  
29  
30  
31  
32  
33  
34  
35  
36  
37 Our study has several limitations. First, although relatively high for a physician  
38 survey,<sup>55-58</sup> our response rate was 45% which raises the potential of response bias.<sup>59</sup>  
39  
40 Second, all physicians surveyed were from healthcare organizations participating in the  
41 PWAC. Although some PWAC institutions are non-academic institutions, most are  
42 academic medical centers, which makes the generalizability of the results to non-  
43 academic settings unclear. Our study also has a number of strengths. It is a large multi-  
44 center study of physicians from 11 healthcare organizations representing all medical  
45 specialties with reasonably high response rate, using validated instruments to assess  
46 burnout, professional fulfillment, sleep, and leadership behavior.

## CONCLUSION

The leadership behaviors of physician supervisors have a strong relationship to their team members' burnout, professional fulfillment, and intent to leave. Female physicians report lower satisfaction with their leaders' leadership behaviors. Greater attention to leader selection, development, and performance evaluation represents a potentially important approach to reducing occupational burnout and promoting professional fulfillment in large healthcare organizations.

**Tables and Figures:**

Table 1. Characteristics of the Respondents

Table 2. Characteristics of the Respondents by the Tertiles of Unit-Level Leadership Ratings

Table 3. Logistic Regression Models of Professional Fulfillment, Burnout and Intent to Leave

Figure 1. Likelihood (% , 95% CI) of Professional Fulfillment Status by the Tertiles of Unit-Level Leadership Behavior Score for Female and Male Physicians

Figure 2. Likelihood (% , 95% CI) of Burnout Status by the Tertiles of Unit-Level Leadership Behavior Score for Female and Male Physicians

Figure 3. Likelihood (% , 95% CI) of Reporting Intent to Leave by the Tertiles of Unit-Level Leadership Behavior Score for Female and Male Physicians

## References

1. Kane, C. Updated data on physician practice arrangements: for the first time, fewer physicians are owners than employees. American Medical Association. *AMA Economic and Health Policy Research*. 2019; 3. <https://www.ama-assn.org/system/files/2019-07/prp-fewer-owners-benchmark-survey-2018.pdf>
2. Hawkins M. Survey of America's physicians: practice patterns and perspectives. [Published online 2016]. <https://www.merrihawkins.com/uploadedFiles/Physicians%20Foundation%202016%20Survey%20of%20Americas%20Physicians.pdf>
3. Shanafelt T, Goh J, Sinsky C. The business case for investing in physician well-being. *JAMA Intern Med*. 2017;177(12):1826-1832. doi:10.1001/jamainternmed.2017.4340
4. Maslach, C. and Jackson, S.E. The measurement of experienced burnout. *J. Organiz. Behav.* 1981; 2: 99-113. <https://doi.org/10.1002/job.4030020205>
5. Tawfik DS, Scheid A, Profit J, et al. Evidence relating health care provider burnout and quality of care: a systematic review and meta-analysis. *Ann Intern Med*. 2019 Oct 15;171(8):555-567. doi: 10.7326/M19-1152. Epub 2019 Oct 8. PMID: 31590181; PMCID: PMC7138707.
6. Shanafelt TD, Balch CM, Bechamps G, et al. Burnout and medical errors among American surgeons. *Ann Surg*. 2010;251(6):995-1000. doi:10.1097/SLA.0b013e3181bfdab3

1  
2  
3 7. Bohman B, Dyrbye L, Sinsky CA. Physician Well-Being: The Reciprocity of Practice  
4 Efficiency, Culture of Wellness, and Personal Resilience. *NJEM Catal*. Published online  
5  
6  
7 2017. Accessed January 20, 2021.

8  
9  
10 [https://catalyst.nejm.org/doi/full/10.1056/CAT.17.0429?casa\\_token=MIYGT-](https://catalyst.nejm.org/doi/full/10.1056/CAT.17.0429?casa_token=MIYGT-8qk_cAAAAA:1QuLaP1w5Dg6R3KqgMyc5u_MsH-y5Wa8Q3Em-rPqf2R_Vx_McVKsM3eUijpqCW8PEc6W3WB7rbSM)  
11  
12 [8qk\\_cAAAAA:1QuLaP1w5Dg6R3KqgMyc5u\\_MsH-y5Wa8Q3Em-](https://catalyst.nejm.org/doi/full/10.1056/CAT.17.0429?casa_token=MIYGT-8qk_cAAAAA:1QuLaP1w5Dg6R3KqgMyc5u_MsH-y5Wa8Q3Em-rPqf2R_Vx_McVKsM3eUijpqCW8PEc6W3WB7rbSM)  
13  
14 [rPqf2R\\_Vx\\_McVKsM3eUijpqCW8PEc6W3WB7rbSM](https://catalyst.nejm.org/doi/full/10.1056/CAT.17.0429?casa_token=MIYGT-8qk_cAAAAA:1QuLaP1w5Dg6R3KqgMyc5u_MsH-y5Wa8Q3Em-rPqf2R_Vx_McVKsM3eUijpqCW8PEc6W3WB7rbSM)  
15  
16

17  
18 8. Hamidi MS, Bohman B, Sandborg C et al. Estimating institutional physician turnover  
19 attributable to self-reported burnout and associated financial burden: a case study. *BMC*  
20 *Health Serv Res*. 2018 Nov 27;18(1):851. doi: 10.1186/s12913-018-3663-z. PMID:  
21  
22 30477483; PMCID: PMC6258170.  
23  
24

25  
26  
27 9. Jackson TN, Percy CP, Khorgami Z, Agrawal V, Taubman KE, Truitt MS. The  
28 Physician Attrition Crisis: A Cross-Sectional Survey of the Risk Factors for Reduced Job  
29 Satisfaction Among US Surgeons. *World J Surg*. 2018;42(5):1285-1292.  
30  
31

32 doi:10.1007/s00268-017-4286-y  
33

34  
35  
36  
37 10. Shanafelt TD, Mungo M, Schmitgen J, et al. Longitudinal study evaluating the  
38 association between physician burnout and changes in professional work effort. *Mayo*  
39 *Clin Proc*. 2016 Apr;91(4):422-31. doi: 10.1016/j.mayocp.2016.02.001. PMID:  
40  
41 27046522.  
42  
43

44  
45  
46 11. Haas JS, Cook EF, Puopolo AL, Burstin HR, Cleary PD, Brennan TA. Is the  
47 professional satisfaction of general internists associated with patient satisfaction? *J Gen*  
48 *Intern Med*. 2000;15(2):122-128. doi:10.1046/j.1525-1497.2000.02219.x  
49  
50  
51

- 1  
2  
3 12. Welle D, Trockel MT, Hamidi MS, et al. Association of occupational distress and  
4 sleep-related impairment in physicians with unsolicited patient complaints. *Mayo Clin*  
5 *Proc.* 2020;95(4):719-726. doi:10.1016/j.mayocp.2019.09.025  
6  
7  
8  
9  
10 13. Windover AK, Martinez K, Mercer MB, Neuendorf K, Boissy A, Rothberg MB.  
11 Correlates and outcomes of physician burnout within a large academic medical  
12 center. *JAMA Intern Med.* 2018;178(6):856-858. doi:10.1001/jamainternmed.2018.0019  
13  
14  
15  
16 14. Han S, Shanafelt TD, Sinsky CA, et al. Estimating the attributable cost of physician  
17 burnout in the United States. *Ann Intern Med.* 2019;170(11):784-790. doi:10.7326/M18-  
18  
19  
20  
21 1422  
22  
23  
24 15. Dyrbye LN, West CP, Hunderfund AL, et al. Relationship between burnout,  
25 professional behaviors, and cost-conscious attitudes among US Physicians. *J Gen*  
26 *Intern Med.* 2020;35(5):1465-1476. doi:10.1007/s11606-019-05376-x  
27  
28  
29  
30  
31 16. West CP, Huschka MM, Novotny PJ, et al. Association of perceived medical errors  
32 with resident distress and empathy: a prospective longitudinal study. *JAMA.*  
33  
34  
35 2006;296(9):1071-1078. doi:10.1001/jama.296.9.1071  
36  
37  
38 17. Menon NK, Shanafelt TD, Sinsky CA, et al. Association of physician burnout with  
39 suicidal ideation and medical errors. *JAMA Netw Open.* 2020;3(12):e2028780.  
40  
41  
42 doi:10.1001/jamanetworkopen.2020.28780  
43  
44  
45 18. Shanafelt TD, Noseworthy J. Executive leadership and physician well-being: nine  
46 organizational strategies to promote engagement and reduce burnout. Mayo Clinic  
47  
48  
49 proceedings. doi:10.1016/j.mayocp.2016.10.004  
50  
51  
52  
53  
54  
55  
56  
57  
58  
59  
60

1  
2  
3 19. Km A. Physician well-being: organizational strategies for physician burnout. FP  
4 essentials. Published August 2018. Accessed January 20, 2021.

5  
6  
7 <https://pubmed.ncbi.nlm.nih.gov/30107106/>

8  
9  
10 20. Mari S, Meyen R, Kim B. Resident-led organizational initiatives to reduce burnout  
11 and improve wellness. *BMC Med Educ*. 2019;19(1):437. doi:10.1186/s12909-019-1756-

12  
13  
14  
15 y

16  
17  
18 21. DeChant PF, Acs A, Rhee KB, et al. Effect of organization-directed workplace  
19 interventions on physician burnout: a systematic review. *Mayo Clin Proc Innov Qual*  
20  
21  
22  
23 *Outcomes*. 2019;3(4):384-408. doi:10.1016/j.mayocpiqo.2019.07.006

24  
25  
26 22. Shanafelt T, Stolz S, Springer J, Murphy D, Bohman B, Trockel M. A Blueprint for  
27 organizational strategies to promote the well-being of health care professionals. *NEJM*  
28  
29  
30  
31 *Catalyst Innovations in Care Delivery*. 2020 Oct 21;1(6).

32  
33  
34  
35 23. Swensen SJ, Shanafelt TD. Mayo Clinic Strategies to Reduce Burnout: 12 Actions  
36 to Create the Idea Workplace. Oxford University Press; 2020.

37  
38  
39  
40 24. Shanafelt TD, Gorringer G, Menaker R, et al. Impact of organizational leadership on  
41 physician burnout and satisfaction. *Mayo Clin Proc*. 2015;90(4):432-440.

42  
43  
44  
45 doi:10.1016/j.mayocp.2015.01.012

46  
47  
48 25. Shanafelt TD, Makowski MS, Wang H, et al. Association of burnout, professional  
49 fulfillment, and self-care practices of physician leaders with their independently rated  
50 leadership effectiveness. *JAMA Netw Open*. 2020;3(6):e207961.

51  
52  
53  
54  
55 doi:10.1001/jamanetworkopen.2020.7961

- 1  
2  
3 26. Shanafelt TD, Wang H, Leonard M, et al. Assessment of the association of  
4 leadership behaviors of supervising physicians With personal-organizational values  
5 alignment among staff physicians. *JAMA Netw Open*. 2021 Feb 1;4(2):e2035622. doi:  
6 10.1001/jamanetworkopen.2020.35622. PMID: 33560424; PMCID: PMC7873777.  
7  
8 27. Stoller JK. Help wanted: developing clinician leaders. *Perspect Med Educ*.  
9 2014;3(3):233-237. doi:10.1007/s40037-014-0119-y  
10  
11 28. Edelman CM, Boen F, Fransen K. The Power of Empowerment: Predictors and  
12 Benefits of Shared Leadership in Organizations. *Front Psychol*. 2020;11:582894.  
13 doi:10.3389/fpsyg.2020.582894  
14  
15 29. White BAA, Bledsoe C, Hendricks R, Arroliga AC. A leadership education  
16 framework addressing relationship management, burnout, and team trust. *Proc Bayl*  
17 *Univ Med Cent*. 2019;32(2):298-300. doi:10.1080/08998280.2018.1550346  
18  
19 30. Trockel MT, Menon NK, Rowe SG, et al. Assessment of physician sleep and  
20 wellness, burnout, and clinically significant medical errors. *JAMA Netw Open*.  
21 2020;3(12):e2028111. Published 2020 Dec 1.  
22 doi:10.1001/jamanetworkopen.2020.28111  
23  
24 31. Trockel M, Bohman B, Lesure E, et al. A brief instrument to assess both burnout  
25 and professional fulfillment in physicians: reliability and validity, including correlation  
26 with self-reported medical errors, in a sample of resident and practicing physicians.  
27 *Acad Psychiatry*. 2018;42(1):11-24. doi:10.1007/s40596-017-0849-3  
28  
29  
30  
31  
32  
33  
34  
35  
36  
37  
38  
39  
40  
41  
42  
43  
44  
45  
46  
47  
48  
49  
50  
51  
52  
53  
54  
55  
56  
57  
58  
59  
60



- 1  
2  
3 32. Trockel MT, Hamidi MS, Menon NK, et al. Self-valuation: Attending to the Most  
4 Important Instrument in the Practice of Medicine. *Mayo Clin Proc.* 2019;94(10):2022-  
5  
6 2031. doi:10.1016/j.mayocp.2019.04.040  
7  
8  
9  
10  
11 doi:10.1001/jamanetworkopen.2020.28111  
12  
13 33. Sleep Related Impairment: A Brief Guide to the PROMIS® Sleep-Related  
14 Impairment Instruments: Adult Pediatric Parent Proxy about Sleep-Related Impairment.  
15  
16 [ Published online March 14 2019].  
17  
18  
19  
20 34. Buysse DJ, Yu L, Moul DE, et al. Development and validation of patient-reported  
21  
22 outcome measures for sleep disturbance and sleep-related impairments. *Sleep.*  
23  
24 2010;33(6):781-792. doi:10.1093/sleep/33.6.781  
25  
26  
27  
28 35. Dyrbye LN, Major-Elechi B, Hays JT, Fraser CH, Buskirk SJ, West CP. Relationship  
29  
30 between organizational leadership and health care employee burnout and satisfaction.  
31  
32 *Mayo Clin Proc.* 2020;95(4):698-708. doi:10.1016/j.mayocp.2019.10.041  
33  
34  
35  
36 36. Siegel TR, Nagengast AK. Mitigating burnout. *Surg Clin North Am.* 2019;99(5):1029-  
37  
38 1035. doi:10.1016/j.suc.2019.06.015  
39  
40  
41 37. Rittenhouse DR, Mertz E, Keane D, Grumbach K. No exit: an evaluation of  
42  
43 measures of physician attrition. *Health Serv Res.* 2004;39(5):1571-1588.  
44  
45  
46 doi:10.1111/j.1475-6773.2004.00304.x  
47  
48  
49 38. Gill JM, Mainous AG III. The role of provider continuity in preventing hospitalizations.  
50  
51 *Arch Fam Med.* 1998;7(4):352-357.  
52  
53  
54  
55  
56  
57  
58  
59  
60

- 1  
2  
3 39. Raddish M, Horn SD, Sharkey PD. Continuity of care: is it cost effective? *Am J*  
4  
5 *Manag Care*. 1999;5(6):727-734.  
6  
7  
8 40. Buchbinder SB, Wilson M, Melick CF, Powe NR. Estimates of costs of primary care  
9  
10 physician turnover. *Am J Manag Care*. 1999;5(11):1431-1438.  
11  
12  
13 41. Misra-Hebert AD, Kay R, Stoller JK. A review of physician turnover: rates, causes,  
14  
15 and consequences. *Am J Med Qual*. 2004;19(2):56-66.  
16  
17  
18 42. Atkinson W, Misra-Hebert A, Stoller JK. The impact on revenue of physician  
19  
20 turnover: an assessment model and experience in a large healthcare center. *J Med*  
21  
22 *Pract Manage*. 2006;21(6):351-355.  
23  
24  
25 43. Person SD, Jordan CG, Allison JJ, et al. Measuring diversity and inclusion in  
26  
27 academic medicine: the diversity engagement survey (DES). *Acad Med J Assoc Am*  
28  
29 *Med Coll*. 2015;90(12):1675-1683. doi:10.1097/ACM.0000000000000921  
30  
31  
32  
33 44. Tesch BJ, Wood HM, Helwig AL, Nattinger AB. Promotion of women physicians in  
34  
35 academic medicine. Glass ceiling or sticky floor? *JAMA*. 1995;273(13):1022-1025.  
36  
37  
38 45. Frank E, Zhao Z, Sen S, Guille C. Gender Disparities in Work and Parental Status  
39  
40 Among Early Career Physicians. *JAMA Netw Open*. 2019;2(8).  
41  
42  
43  
44  
45  
46  
47  
48  
49  
50  
51  
52  
53  
54  
55  
56  
57  
58  
59  
60

- 1  
2  
3 47. Cochran A, Hauschild T, Elder WB, Neumayer LA, Brasel KJ, Crandall ML.  
4 Perceived gender-based barriers to careers in academic surgery. *Am J Surg*.  
5  
6 2013;206(2):263-268. doi:10.1016/j.amjsurg.2012.07.044  
7  
8  
9  
10 48. Zhuge Y, Kaufman J, Simeone DM, Chen H, Velazquez OC. Is there still a glass  
11 ceiling for women in academic surgery? *Ann Surg*. 2011;253(4):637-643.  
12  
13 doi:10.1097/SLA.0b013e3182111120  
14  
15  
16  
17 49. Liang R, Dornan T, Nestel D. Why do women leave surgical training? A qualitative  
18 and feminist study. *Lancet*. 2019;393(10171):541-549. doi:10.1016/S0140-  
19  
20 6736(18)32612-6  
21  
22  
23  
24 50. Bingmer K, Wojnarski CM, Brady JT, Stein SL, Ho VP, Steinhagen E. A Model for a  
25 formal mentorship program in surgical residency. *J Surg Res*. 2019;243:64-70.  
26  
27 doi:10.1016/j.jss.2019.04.068  
28  
29  
30  
31 51. Khoushal Z, Hussain MA, Greco E, et al. Prevalence and causes of attrition  
32 among surgical residents: A Systematic Review and Meta-analysis. *JAMA Surg*.  
33  
34 2017;152(3):265-272. doi:10.1001/jamasurg.2016.4086  
35  
36  
37  
38 52. Templeton K, Bernstein CA, Sukhera J, et al. Gender-based differences in burnout:  
39 issues faced by women physicians. *NAM Perspect*. Published online May 30, 2019.  
40  
41 doi:10.31478/201905a  
42  
43  
44 53. Shanafelt T, Trockel M, Rodriguez A, Logan D. Wellness-centered leadership:  
45 equipping health care leaders to cultivate physician well-being and professional  
46 fulfillment. *Acad Med*. 2021;96(5):641-651. doi:10.1097/ACM.0000000000003907  
47  
48  
49  
50  
51  
52  
53  
54  
55  
56  
57  
58  
59  
60

- 1  
2  
3 54. Smith, C. D., C. Balatbat, S. Corbridge, et al. Implementing optimal team-based  
4 care to reduce clinician burnout. *NAM Perspectives*. 2018 Discussion Paper, National  
5 Academy of Medicine, Washington, DC. <https://doi.org/10.31478/201809c>  
6  
7  
8  
9  
10  
11 55. Shanafelt T, Swensen S. Leadership and physician burnout: using the annual  
12 review to reduce burnout and promote engagement. *Am J Med Qual*. 2017;32(5):563-  
13 565. doi:10.1177/1062860617691605  
14  
15  
16  
17  
18 56. Allegra C, Hall R, Yothers G. Prevalence of burnout in the US oncology community:  
19 results of a 2003 survey. *J Onc Pract*. 2005;1:140-147.  
20  
21  
22  
23 57. Kuerer HM, Eberlein TJ, Pollock RE, et al. Career satisfaction, practice patterns and  
24 burnout among surgical oncologists: report on the quality of life of members of the  
25 Society of Surgical Oncology. *Ann Surg Oncol*. 2007;14(11):3043-3053  
26  
27  
28  
29  
30  
31 58. Shanafelt TD, Balch CM, Bechamps GJ, et al. Burnout and career satisfaction  
32 among American surgeons. *Annals of Surgery*. 2009;250(3):463-471.  
33  
34  
35  
36 59. Asch D, Jedrzejewski M, Christakis N. Response rates to mail surveys published in  
37 medical journals. *J Clin Epidemiol*. 1997;50:1129-1136.  
38  
39  
40  
41  
42  
43  
44  
45  
46  
47  
48  
49  
50  
51  
52  
53  
54  
55  
56  
57  
58  
59  
60

1  
2  
3  
4  
5  
6  
7  
8  
9  
10  
11  
12  
13  
14  
15  
16  
17  
18  
19  
20  
21  
22  
23  
24  
25  
26  
27  
28  
29  
30  
31  
32  
33  
34  
35  
36  
37  
38  
39  
40  
41  
42  
43  
44  
45  
46  
47  
48  
49  
50  
51  
52  
53  
54  
55  
56  
57  
58  
59  
60

**Figure 1. Likelihood (% , 95% CI) of Professional Fulfillment Status by the Tertiles of Unit-Level Leadership Behavior Score for Female and Male Physicians**

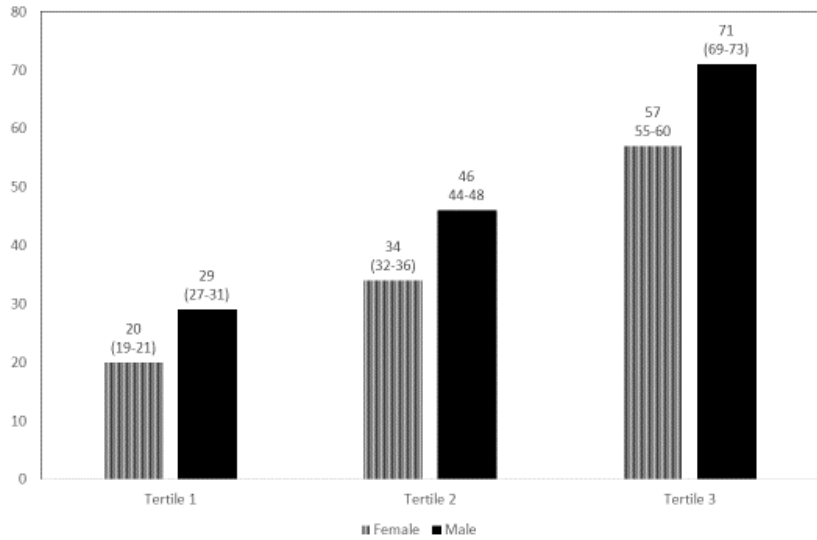

view only

1  
2  
3  
4  
5  
6  
7  
8  
9  
10  
11  
12  
13  
14  
15  
16  
17  
18  
19  
20  
21  
22  
23  
24  
25  
26  
27  
28  
29  
30  
31  
32  
33  
34  
35  
36  
37  
38  
39  
40  
41  
42  
43  
44  
45  
46  
47  
48  
49  
50  
51  
52  
53  
54  
55  
56  
57  
58  
59  
60

For peer review only

1  
2  
3  
4  
5  
6  
7  
8  
9  
10  
11  
12  
13  
14  
15  
16  
17  
18  
19  
20  
21  
22  
23  
24  
25  
26  
27  
28  
29  
30  
31  
32  
33  
34  
35  
36  
37  
38  
39  
40  
41  
42  
43  
44  
45  
46  
47  
48  
49  
50  
51  
52  
53  
54  
55  
56  
57  
58  
59  
60

**Figure 2. Likelihood (% , 95% CI) of Burnout Status by the Tertiles of Unit-Level Leadership Behavior Score for Female and Male Physicians**

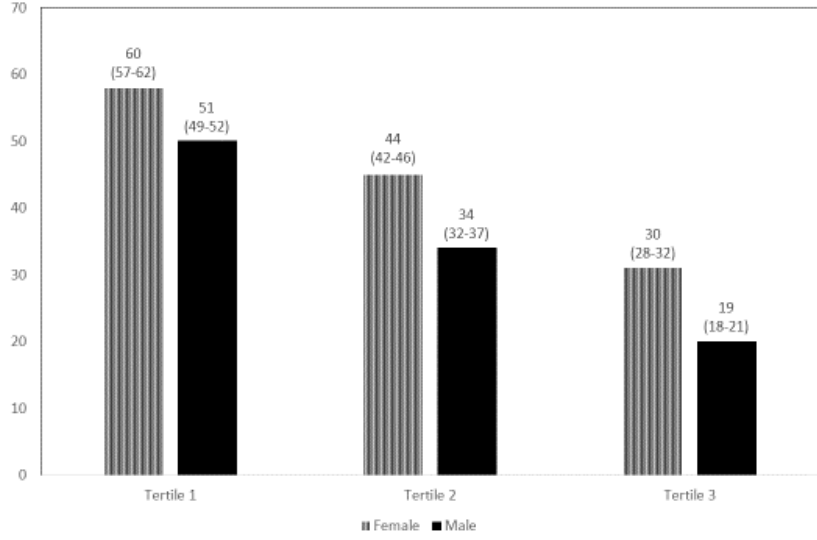

Review only

**Figure 3. Likelihood (% , 95% CI) of Reporting Intent to Leave by the Tertiles of Unit-Level Leadership Behavior Score for Female and Male Physicians**

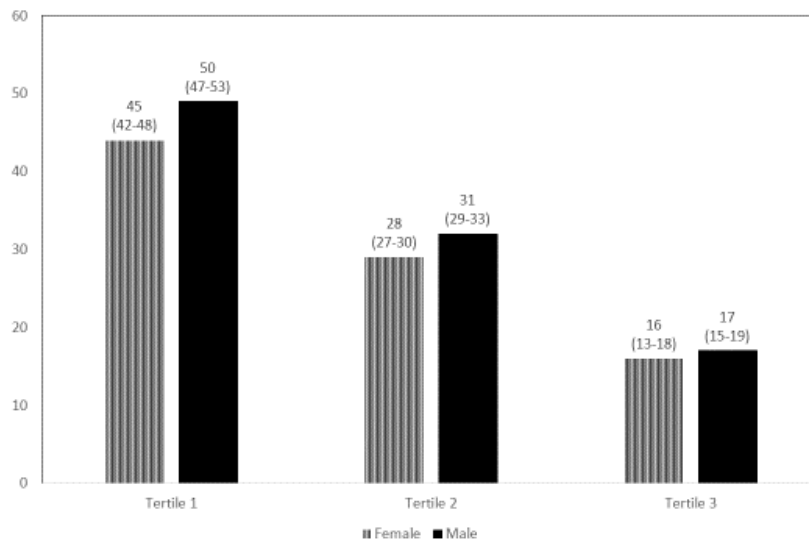

Review only



# BMJ Open

## The impact of leadership behavior on physician wellbeing, burnout, professional fulfillment and intent to leave: a multi-center cross-sectional survey study

|                                 |                                                                                                                                                                                                                                                                                                |
|---------------------------------|------------------------------------------------------------------------------------------------------------------------------------------------------------------------------------------------------------------------------------------------------------------------------------------------|
| Journal:                        | <i>BMJ Open</i>                                                                                                                                                                                                                                                                                |
| Manuscript ID                   | bmjopen-2021-057554.R1                                                                                                                                                                                                                                                                         |
| Article Type:                   | Original research                                                                                                                                                                                                                                                                              |
| Date Submitted by the Author:   | 23-Jan-2022                                                                                                                                                                                                                                                                                    |
| Complete List of Authors:       | Mete, Mihriye; MedStar Health Research Institute; Georgetown University Medical Center, Department of Psychiatry<br>Goldman, Charlotte; MedStar Georgetown University Hospital, Shanafelt, Tait ; Stanford University, Medicine<br>Marchalik, Daniel; Georgetown University School of Medicine |
| <b>Primary Subject Heading</b>: | Health services research                                                                                                                                                                                                                                                                       |
| Secondary Subject Heading:      | Mental health, Medical education and training, Health services research                                                                                                                                                                                                                        |
| Keywords:                       | Human resource management < HEALTH SERVICES ADMINISTRATION & MANAGEMENT, Organisational development < HEALTH SERVICES ADMINISTRATION & MANAGEMENT, Quality in health care < HEALTH SERVICES ADMINISTRATION & MANAGEMENT, HEALTH SERVICES ADMINISTRATION & MANAGEMENT                           |
|                                 |                                                                                                                                                                                                                                                                                                |

SCHOLARONE™  
Manuscripts



I, the Submitting Author has the right to grant and does grant on behalf of all authors of the Work (as defined in the below author licence), an exclusive licence and/or a non-exclusive licence for contributions from authors who are: i) UK Crown employees; ii) where BMJ has agreed a CC-BY licence shall apply, and/or iii) in accordance with the terms applicable for US Federal Government officers or employees acting as part of their official duties; on a worldwide, perpetual, irrevocable, royalty-free basis to BMJ Publishing Group Ltd ("BMJ") its licensees and where the relevant Journal is co-owned by BMJ to the co-owners of the Journal, to publish the Work in this journal and any other BMJ products and to exploit all rights, as set out in our [licence](#).

The Submitting Author accepts and understands that any supply made under these terms is made by BMJ to the Submitting Author unless you are acting as an employee on behalf of your employer or a postgraduate student of an affiliated institution which is paying any applicable article publishing charge ("APC") for Open Access articles. Where the Submitting Author wishes to make the Work available on an Open Access basis (and intends to pay the relevant APC), the terms of reuse of such Open Access shall be governed by a Creative Commons licence – details of these licences and which [Creative Commons](#) licence will apply to this Work are set out in our licence referred to above.

Other than as permitted in any relevant BMJ Author's Self Archiving Policies, I confirm this Work has not been accepted for publication elsewhere, is not being considered for publication elsewhere and does not duplicate material already published. I confirm all authors consent to publication of this Work and authorise the granting of this licence.

1  
2  
3 **Title:** The impact of leadership behavior on physician wellbeing, burnout, professional  
4 fulfillment and intent to leave: a multi-center cross-sectional survey study  
5  
6  
7  
8  
9  
10

11  
12 \*Mihriye Mete, PhD<sup>1,2</sup>, Charlotte Goldman, MD<sup>3</sup>, \*\*Tait D. Shanafelt, MD<sup>4</sup>, \*\*Daniel  
13 Marchalik, MD<sup>3</sup>  
14  
15  
16  
17  
18

19 *Affiliations:*  
20  
21  
22  
23

24 <sup>1</sup> MedStar Health Research Institute, Hyattsville, Maryland  
25

26 <sup>2</sup> Department of Psychiatry, Georgetown University Medical Center  
27

28 <sup>3</sup> Department of Urology, MedStar Health, MedStar Georgetown University Hospital  
29

30 <sup>4</sup> Department of Medicine, Stanford University School of Medicine, Stanford, California  
31  
32  
33  
34  
35  
36  
37  
38  
39

40 \*Corresponding Author:  
41

42 Mihriye Mete, PhD  
43

44 Director, Behavioral Health Research  
45

46 MedStar Health Research Institute  
47

48 Mihriye.mete@medstar.net  
49

50 Words: 2981/3000  
51  
52

53  
54 \*\* Dr. Marchalik and Dr. Shanafelt are shared co-last authors.  
55  
56  
57  
58  
59  
60

1  
2  
3 **Author Contributions:** Dr. Mete had full access to all of the study data provided by  
4 PWAC and take responsibility for the integrity and the accuracy of the data analysis.  
5  
6

7  
8 Concept and design: Marchalik, Mete and Shanafelt.  
9

10  
11 Acquisition, analysis, or interpretation of data: Mete, Marchalik and Shanafelt  
12

13  
14 Drafting of the manuscript: Mete, Goldman  
15

16  
17 Critical revision of the manuscript for important intellectual content: Shanafelt,  
18 Marchalik, Goldman  
19

20  
21 Statistical analysis: Mete.  
22

23  
24 Administrative, technical, or material support: Marchalik, Mete  
25

26  
27  
28  
29  
30 The Corresponding Author has the right to grant on behalf of all authors and does grant  
31 on behalf of all authors, an exclusive license (or non exclusive for government  
32 employees) on a worldwide basis to the BMJ Publishing Group Ltd to permit this article  
33 (if accepted) to be published in BMJ editions and any other BMJPG products and  
34 sublicences such use and exploit all subsidiary rights, as set out in our license.  
35  
36

37  
38 Ethical Approval: not indicated.  
39

40  
41  
42  
43  
44 Transparency statement: Mihriye Mete affirms this manuscript is an honest, accurate  
45 and transparent account of the study reports; no aspects have been omitted and all  
46 discrepancies have been explained.  
47  
48

49  
50 Funding information: None  
51

52  
53 Conflict of Interests: Dr. Shanafelt is coinventor of the Mayo Clinic Participatory  
54 Management Leadership Index and Well-being Index Instruments (Physician Well-being  
55  
56  
57

1  
2  
3 Index, Medical Student Well-being Index, Nurse Well-being Index, Well-being Index).

4  
5 Mayo Clinic holds the copyright to these instruments and has licensed them for use

6  
7 outside of Mayo Clinic. Dr Shanafelt receives a portion of any royalties paid to Mayo

8  
9 Clinic. Dr Shanafelt reported receiving honoraria from grand rounds or keynote lecture

10  
11 presentations and advising for health care organizations outside the submitted work.

12  
13  
14 Other authors report no conflict of interest.  
15  
16  
17  
18  
19  
20  
21  
22  
23  
24  
25  
26  
27  
28  
29  
30  
31  
32  
33  
34  
35  
36  
37  
38  
39  
40  
41  
42  
43  
44  
45  
46  
47  
48  
49  
50  
51  
52  
53  
54  
55  
56  
57  
58  
59  
60

**Summary Box:**

- More and more physicians are working in large organization or group practices, increasing the impact of work unit leadership in physician wellness
- Leadership has been identified as a risk factor for burnout and workplace satisfaction in limited previous studies.
- The relationship between leader behavior and physician wellbeing, professional fulfillment and their intent to leave their organizations has not been measured in a multi-center study.
- Physicians who ranked their supervisors in the top tertile of leadership demonstrated 5.8x higher odds of professional fulfillment, 48% less burnout, and 66% lower intent to leave their jobs than those who ranked their supervisors in the lowest tertile.
- Our large multicenter study demonstrates that leadership behavior is strongly associated with physicians' professional fulfillment, burnout and intent to leave their organizations.

**Abstract:**

**Objective:** To examine how perceived leadership behaviors affect burnout, professional fulfillment and intent to leave the organization among physicians.

**Design:** Anonymous cross-sectional survey study from November 2016 to October 2018.

**Setting:** 12,036 attending and resident physicians at eleven healthcare organizations participating in the Physician Wellness Academic Consortium (PWAC) were surveyed to assess burnout and professional fulfillment and their drivers.

**Participants:** A sample of 5416 attending physicians with complete data on gender, specialty, leadership, burnout and professional fulfillment.

**Main Outcomes and Measures:** The leadership behavior of each physician's supervisor was assessed using the Mayo Clinic Participatory Management Leadership Index and categorized in tertiles. Multivariable logistic regression analyses examined the effect of leadership behavior rating of each physician's supervisor on burnout, professional fulfillment, and intent to leave controlling for gender and specialty.

**Results:** The response rate was 45% across 11 institutions. Half of respondents were female. Professional fulfillment increased with increasing tertiles of leadership behavior rating (19%, 34%, 47%  $p < 0.001$ ). The odds of professional fulfillment were 5.8 times higher (OR=5.8, 95%CI 5.1-6.59) for physicians in the top tertile compared to those in the lowest tertile. Physicians in the top tertile were also 48% less likely to be burned out (OR=0.52, 95%CI 0.45-0.61) and reported 66% lower intent to leave (OR=0.34, 95% CI 0.26-0.44). Individuals who rated their supervisor's leadership in upper tertiles relative to

1  
2  
3 lower tertiles exhibited lower levels of burnout (18% vs 35% vs 47%  $p<0.001$ ), and  
4  
5 intent to leave (16% vs 24% vs 50%  $p<0.001$ ).  
6

7  
8 **Conclusion:** Perceived leadership behaviors have a strong relationship with burnout,  
9  
10 professional fulfillment, and intent to leave among physicians. Organizations should  
11  
12 consider leadership development as a potential vehicle to improve physician wellness  
13  
14 and prevent costly physician departures.  
15

16  
17  
18  
19 Abstract word count: 290  
20

21  
22  
23  
24 Keywords: burnout, leadership, gender, professional fulfillment  
25  
26  
27  
28

### 29 **Strengths and Limitations of this Study:**

- 31 • First multi-center survey that analyzed the effect of supervisor leadership  
32 behaviors on physician wellbeing, professional fulfillment and intent to leave.  
33
- 34 • Leadership was evaluated by 5416 physicians representing at least 12  
35 specialties from eleven healthcare organizations.  
36
- 37 • Validated instruments were used to assess burnout, professional fulfillment and  
38 leadership behavior.  
39
- 40 • Response rate of 45%, although relatively high for a physician survey, may still  
41 contribute to selection bias.  
42
- 43 • Respondents are from member institutions of the Physician Wellness Academic  
44 Consortium (PWAC), which may limit generalizability.  
45  
46  
47  
48  
49  
50  
51  
52  
53  
54  
55  
56  
57  
58  
59  
60



## INTRODUCTION

As the landscape of modern medicine continues to grow and change, physicians are increasingly becoming employed by large organizations.<sup>1</sup> Solo or small practices are becoming less common, and up to two thirds of physicians are now employed by large practice groups and 20% of physicians employed by a practice of greater than 100 physicians.<sup>2</sup> The trend to group medicine exists beyond the boundaries of academic medicine or private practice, including university hospitals, health maintenance organizations, practice groups, and health systems.

Healthcare organizations have increasingly recognized the impact of occupational burnout and physician well-being on their ability to provide high quality healthcare to their communities.<sup>3</sup> The components of burnout include emotional exhaustion (EE), depersonalization, and decreased personal efficacy in the context of the work environment.<sup>4</sup> Concern for physician burnout has gained increasing attention given its implications for patient and provider health. Burnout has previously been associated with worse quality of care,<sup>5-7</sup> physician attrition,<sup>8-10</sup> patient satisfaction,<sup>11-13</sup> cost of care,<sup>3,14-15</sup> and medical errors.<sup>6,16-17</sup> Institutional factors involved in burnout and professional fulfillment act as modifiable factors that can be targeted by organizations.<sup>18-</sup>

23

The impact of leadership effectiveness on burnout and workplace satisfaction for physicians is of importance for healthcare organizations.<sup>24-26</sup> A study of 2800 physicians

1  
2  
3 at the Mayo Clinic demonstrated that average leadership behavior score of physicians'  
4 work unit supervisor explained 11% of the variation in burnout and 47% of the variation  
5 in workplace satisfaction across 129 work units when adjusted for other factors.<sup>24</sup> The  
6 leadership behaviors of physicians immediate supervisor have also been found to have  
7 a strong impact on physicians' perception of values alignment with their organization as  
8 a whole.<sup>26</sup> Healthcare leaders face many challenges, balancing costs with ever  
9 changing reimbursements, managing personnel, and addressing dynamic quality  
10 metrics.<sup>27</sup> However, physician training is largely focused on the individual, with an  
11 emphasis on clinical care of patients. Developing leadership skills in physician  
12 supervisors, organizations can make a large impact in the wellbeing of their clinicians  
13 and foster better patient care.<sup>18, 25,28-29</sup> Additionally, by understanding and targeting  
14 leadership, organizations can impact a large number of healthcare professionals and  
15 teams under each leader's supervision. We sought to further evaluate the factors  
16 involved in physician burnout by understanding the relationship between leadership,  
17 burnout, profession fulfillment, and intent to leave.

## 41 METHODS:

42  
43  
44 A cross sectional study of attending physicians in the United States was performed at  
45 eleven healthcare organizations participating in the Physician Wellness Academic  
46 Consortium (PWAC-<https://wellbeingconsortium.org>). A standardized survey was  
47 administered at participating institutions to be distributed to physicians from all available  
48 departments. A total of 12036 attending and resident physicians across 11 institutions  
49 were surveyed between November 2016 and October 2018 as part of their membership

1  
2  
3 in the Physician Wellness Academic Consortium. Among these, 5795 attendings  
4 completed evaluation of their supervisor using the 9-item version of the Mayo Clinic  
5 Participatory Management Leadership Index. Resident physician data and incomplete  
6 data from attending physicians on gender, specialty, leadership rating scale, burnout or  
7 professional fulfillment were excluded. The dataset was de-identified by a third-party  
8 administrator prior to analysis.  
9

### 19 Patient and Public Involvement

20 Patients or the public were not involved in the design, conduct or reporting of the study.  
21 Given that this was an anonymous deidentified study, the results will be disseminated  
22 by publication of this study without direct contact to participants.  
23  
24  
25  
26  
27  
28  
29

### 31 Measures

32  
33  
34 Supervisor Leadership Behavior Score: Participants were asked to evaluate their leader  
35 using the organizational leadership subscale based on the revised 9-item Mayo Clinic  
36 Participatory Management Leadership Index (included in the Appendix, used with  
37 permission from Mayo Clinic).<sup>25</sup> This instrument was designed to evaluate leadership  
38 behaviors associated with team member engagement, including dimensions related to  
39 inclusion (treating everyone with respect), keeping people informed, soliciting input,  
40 empowering team members, nurturing professional development, and providing  
41 feedback and recognition. Each item is scored on a 5-point scale (0-4) and the scores  
42 from the individual items are summed to compute an aggregate score (with higher  
43 scores indicating more favorable ratings). The total score was then categorized into  
44  
45  
46  
47  
48  
49  
50  
51  
52  
53  
54  
55  
56  
57  
58  
59  
60

1  
2  
3 tertiles to represent groups of participants' leadership scores in increasing order  
4  
5 towards more favorable evaluations.  
6  
7

8 *Professional Fulfillment Index*: The PFI was used to measure professional fulfillment  
9 and burnout. The PFI includes 6 items for the assessment of professional fulfillment, 4  
10 items for the assessment of work exhaustion and 6 items to assess interpersonal  
11 disengagement. The burnout score represents the mean of 10 work exhaustion and  
12 interpersonal disengagement items, scored on a Likert scale from 0 (not at all) to 4  
13 (extremely), where 4 indicates the highest burnout score. The professional fulfillment  
14 scale assesses the degree of intrinsic positive reward the individual derives from their  
15 work, including happiness, meaningfulness, contribution, self-worth, satisfaction, and  
16 feeling in control when dealing with difficult problems at work. Items are measured on a  
17 five-point Likert scale from 0 (not at all true) to 4 (completely true). The mean score  
18 represents the mean of all 6 items and ranges between 0 and 4. Burnout score and  
19 professional fulfillment scores were rescaled to be between 0 and 10 to make  
20 interpretations simpler and consistent with recent reports.<sup>25-26,30</sup> Based on the published  
21 validation studies,<sup>31-32</sup> the established thresholds for burnout and professional fulfillment  
22 on the 0-10 scales are  $\geq 3.25$  and  $\geq 7.5$  respectively.  
23  
24  
25  
26  
27  
28  
29  
30  
31  
32  
33  
34  
35  
36  
37  
38  
39  
40  
41  
42

43 *Intent to Leave*: Participants were asked if they intended to leave their institution within  
44 two years (*What is the likelihood that you will leave your institution within two years?*).  
45 The response choices were none, slight, moderate, likely, and definitely. The responses  
46 were then collapsed to form a binary variable (0=none, 1 otherwise) indicating that the  
47 participants have at least "slight" likelihood of leaving.  
48  
49  
50  
51  
52  
53

## 54 55 56 **Statistical Analyses** 57 58 59 60

1  
2  
3 Data were summarized for the overall sample (Table 1) and by tertiles of the leadership  
4 behavior score using frequencies and percentages for categorical variables (Table 2).  
5  
6 The association between leadership behavior score and variables of interests were  
7 statistically tested using Chi-square and trend tests presented in Table 2. Kramer's V  
8 statistic was included in Table 2 to show the degree of associations between categorical  
9 variables. Linear associations between continuous variables and leadership ratings  
10 were examined using correlation coefficients. Internal validity of the organizational  
11 leadership scale was assessed using Cronbach's alpha. Multivariable logistic regression  
12 analyses were conducted to examine the association between the leadership behavior  
13 score of each physician's supervisor and burnout and intent to leave controlling for  
14 gender, professional fulfillment and specialty. The correlation within specialty groups  
15 was accounted for using clustering at specialty level (logistic command with cluster  
16 option in Stata 15). Estimated odds ratios with 95% confidence intervals and p-values  
17 were presented in Table 3. Predictive margins over leadership scale tertiles were  
18 computed based on the logistic regression models for male and female physicians and  
19 presented in Figures 1-3. All statistical analyses were conducted in Stata 15. A p-value  
20 of <.05 was considered statistically significant.  
21  
22  
23  
24  
25  
26  
27  
28  
29  
30  
31  
32  
33  
34  
35  
36  
37  
38  
39  
40  
41  
42  
43  
44  
45  
46  
47  
48

## 49 RESULTS

50  
51  
52  
53  
54  
55  
56  
57  
58  
59  
60

1  
2  
3 The overall attending physician response rate for the PWAC survey was 45%. Fully  
4 completed surveys from 5416 attending physicians were included in the analysis. The  
5  
6 personal and professional characteristics of responders are shown in Table 1.  
7  
8  
9

10 Table 2 presents data on the relationships between specialty distribution, burnout,  
11 professional fulfillment and intent to leave by the tertiles of the scores on the  
12  
13 Participatory Management Leadership Index, which showed high internal consistency  
14  
15 (Cronbach's alpha=0.95) in this sample.  
16  
17  
18  
19

20 Female physicians represented 50% (2710/5416) of all participants. The percentage of  
21 female physicians who rated their immediate supervisor in the highest tertile of the  
22  
23 leaderships scale was significantly lower than male physicians (28% vs 33%  $p<0.001$ ).  
24  
25 Male physicians rated their leaders more favorably compared to female physicians (2.8  
26  
27 (1.0) vs 2.6 (1.0),  $p<0.001$ ). By specialty, Dermatologists (56%) and Pathologists (41%)  
28  
29 had the highest proportion who rated their immediate supervisor in the highest tertile of  
30  
31 the leadership behavior. In contrast, Ob-Gyn specialists (40%), Anesthesiologists  
32  
33 (38%) and Internal Medicine physicians (31%) were least likely to rate their immediate  
34  
35 supervisor in the highest tertile of the leaderships scale.  
36  
37  
38  
39  
40  
41

42 The leadership behavior rating of each physician's supervisor was negatively  
43  
44 associated with burnout score ( $r=-0.34$ ,  $p<0.001$ ) and positively associated with  
45  
46 professional fulfillment score ( $r=0.44$ ,  $p<0.001$ ). There was a significant positive  
47  
48 association between professional fulfillment and leadership behavior score. Mean  
49  
50 professional fulfillments scores (4.6, 4.4, 4.0,  $p<0.001$ ) and the percentage of those with  
51  
52 professional fulfillment were higher at higher tertiles of leadership behavior scores  
53  
54 (lowest tertile: 19%, middle tertile: 34% and highest tertile: 47%, Kramer's V:0.33;  
55  
56  
57  
58  
59  
60

1  
2  
3 p<0.001). The mean burnout score (3.7, 3.0, 2.2, p<0.001) and percentage of  
4  
5  
6  
7  
8  
9  
10  
11  
12  
13  
14  
15  
16  
17  
18  
19  
20  
21  
22  
23  
24  
25  
26  
27  
28  
29  
30  
31  
32  
33  
34  
35  
36  
37  
38  
39  
40  
41  
42  
43  
44  
45  
46  
47  
48  
49  
50  
51  
52  
53  
54  
55  
56  
57  
58  
59  
60

p<0.001). The mean burnout score (3.7, 3.0, 2.2, p<0.001) and percentage of physicians who had a high burnout score decreased with increasing tertiles of leadership behavior score (47%, 35% and 18%, Kramer's V:0.26, p<0.001). Similarly, the percentage of those who reported an intent to leave their institution in the next two years decreased with increasing tertiles of leadership behavior score (50%, 34% and 16%, Kramer's V:0.27, p<0.001).

Table 3 presents multivariable logistic regression models of professional fulfillment (Model 1), burnout status (Model 2) and intent to leave (Model 3) in relation to leadership behavior rating of physician's supervisor. The strong association between professional fulfillment and leadership behavior score is demonstrated in Model 1. Physicians who have more favorable evaluations of their leaders were more likely to be in the professionally fulfilled category. Specifically, the odds of having high professional fulfillment increased by a factor of 2.1 for those who rated their leader in the second tertile compared to those in the lowest tertile (OR:2.10, 95% CI: 1.85-2.37) while the odds increased by a factor of 5.8 for those who are in the top tertile compared to those in the lowest tertile (OR:5.80, 95% CI:5.10-6.59, AUC 0.71). This model also demonstrates that female physicians were significantly less likely to have high professional fulfillment after adjusting for specialty, and supervisor leadership behavior rating (OR:0.58, 95% CI: 0.51-0.66). Figure 1 illustrates the likelihood of having professional fulfillment for each leadership behavior tertile of physician's supervisor for female and male physicians based on the predicted probabilities obtained from Model 1. Non-overlapping confidence intervals at each tertile show that the difference between

1  
2  
3 gender groups is maintained across tertiles suggesting that the association between of  
4 leadership score on professional fulfillment is not dependent on gender. This is  
5 evidenced by non-significant interaction effects between gender and leadership  
6 behavior score tertiles in Model 1 when interaction terms are included.  
7  
8  
9  
10  
11  
12

13 The relationship between organizational leadership and physician burnout is assessed  
14 in Model 2, which is adjusted by gender, specialty and professional fulfillment.  
15

16  
17 Physicians who rated the leader behavior of their supervisor in the second tertile were  
18 48% less likely to be burned out compared to those who are in the first tertile (OR:0.52,  
19 95% CI:0.45-0.61); those who are in the top tertile of leadership behavior score were  
20 74% less likely to be burned out compared to those who are in the first tertile (OR:0.26,  
21 95% CI:0.23-0.31). Model 2 also showed that the odds of reporting burnout are 57%  
22 higher for female physicians (OR:1.57 95% CI: 1.41-1.76, AUC 0.77). The likelihood of  
23 burnout derived from Model 2 by the tertiles of leadership behavior score is illustrated  
24 for male and female physicians in Figure 2. The gender differences in burnout by  
25 increasing tertiles of leadership behavior score remained similar across tertiles indicated  
26 by non-overlapping confidence intervals at each tertile and non-significant interactions  
27 between gender and leadership behavior score tertiles in Model 2.  
28  
29  
30  
31  
32  
33  
34  
35  
36  
37  
38  
39  
40  
41  
42  
43  
44  
45  
46

47 Model 3 estimates the effect of leadership behavior rating of each physician's  
48 supervisor on the likelihood that a physician intent to leave their institution within the  
49 next two years. This model is adjusted by gender, specialty, burnout and professional  
50 fulfillment status as potential confounders of intent to leave. Physicians who rated the  
51 leader behavior of their supervisor in the second tertile were 44% less likely to report an  
52  
53  
54  
55  
56  
57  
58  
59  
60



1  
2  
3 intent to leave compared to those who were in the first tertile (OR:0.56, 95% CI:0.48-  
4 0.65); those who were in the top tertile of supervisor leadership behavior score are 66%  
5  
6 less likely to intend to leave compared to those who were in the first tertile (OR:0.34,  
7  
8 95% CI:0.26-0.44). Model 3 also shows that the odds of reporting intent to leave were  
9  
10 30% lower for female physicians (OR:0.70 95% CI: 0.60-0.83) and 54% lower for those  
11  
12 with high professional fulfillment (OR:0.46, 95% CI:0.40-0.52). The area under the ROC  
13  
14 curve for this model is 0.74. The likelihood of having intent to leave for male and female  
15  
16 physicians in this model by the tertiles of supervisor leadership behavior score is shown  
17  
18 in Figure 3. Fifty percent (95% CI: 47-53) of male physicians and 45% (95% CI: 42-48)  
19  
20 of female physicians in the lowest tertile of leadership behavior score reported an intent  
21  
22 to leave in two years compared to 17% of male physicians and 16% of female  
23  
24 physicians in the top tertile. The difference between the gender groups in the top tertile  
25  
26 is significantly narrower compared to that in the lower tertile evidenced by a statistically  
27  
28 significant interaction term (genderXtertile3, OR=0.70, 95% CI: 0.52-0.94, p=0.02) when  
29  
30 interaction terms are included.  
31  
32  
33  
34  
35  
36  
37  
38  
39  
40

## 41 DISCUSSION

42  
43  
44 This multi-institution study demonstrates a strong relationship between leadership  
45  
46 evaluations and burnout, professional fulfillment and intent to leave current organization  
47  
48 among US physicians. These results are consistent with previous single center studies  
49  
50 which have demonstrated the significant impact of leadership quality on healthcare  
51  
52 professional burnout and professional fulfillment.<sup>24-26,33</sup> The association between  
53  
54 leadership and burnout remains strong even when we control for professional fulfillment,  
55  
56  
57  
58  
59  
60

1  
2  
3 which has a well-established strong inverse relationship with burnout.<sup>34</sup> Although the  
4 present study looks at the correlation between individuals' rating of the leadership  
5 behavior of their supervisor and their own well-being and professional fulfillment,  
6 previous studies have also found a strong relationship between the composite  
7 leadership behavior score of a leader (as assessed by all individuals reporting to them)  
8 and the risk of burnout and professional fulfillment for the members of the team as a  
9 whole.<sup>24-26</sup> Leader behavior score also had a strong relationship with intent to leave.  
10 These results are consistent with the notion that physicians who are dissatisfied with  
11 their supervisor' ability to lead the team are the more likely to consider other  
12 opportunities. Prior studies demonstrated physicians who report intent to leave are three  
13 times more likely to leave their institution in the next two years.<sup>8,9,35</sup> This is especially  
14 important as the cost of replacing physicians is significant, and turnover and burnout  
15 can be associated with lower quality and higher cost care for patients.<sup>3, 46-40</sup>  
16 Notably, in our study, a lower percentage of female physicians rated the leadership  
17 behaviors of their supervisor in the top tertile and a higher percentage rated the  
18 behaviors of their supervisor in the lowest tertile. Previous studies have indicated  
19 female physicians report greater workplace bullying, harassment, gender  
20 discrimination, and feelings of isolation.<sup>41-49</sup> While female physicians are no longer a  
21 minority in the profession, they are often underrepresented in leadership, potentially due  
22 to inequality and bias in the opportunity for promotion and reward.<sup>7, 41-44, 50</sup> This also  
23 results in fewer female leaders serving as mentors and role models, which may be  
24 protective against burnout.<sup>42, 45-47, 50</sup>  
25  
26  
27  
28  
29  
30  
31  
32  
33  
34  
35  
36  
37  
38  
39  
40  
41  
42  
43  
44  
45  
46  
47  
48  
49  
50  
51  
52  
53  
54  
55  
56  
57  
58  
59  
60

1  
2  
3 Interestingly, in our adjusted analysis controlling for burnout, professional fulfillment,  
4 and the behavior score of their leader, female physicians reported less intent to leave  
5 than male physicians (OR 0.7 CI 0.59-0.83  $p < 0.001$ ). This is in contrast to prior studies  
6 demonstrating a 8-10% higher attrition rate in female physicians.<sup>35, 43,49</sup> These  
7 observations are consistent with the possibility that higher attrition rates among women  
8 physicians may be due to lower satisfaction with their leader and higher rates of  
9 burnout. Because intent to leave describes a longer-term plan to change jobs, it is also  
10 possible that female physicians may leave their jobs more suddenly.

11  
12 Investing in the leadership development of supervising physicians maybe an important  
13 strategy to mitigate burnout and promote professional fulfillment in physicians. An  
14 integrative model of Wellness-Centered Leadership (WCL) incorporating the critical  
15 skills and leadership behaviors that cultivate engagement and professional fulfillment  
16 was recently published.<sup>51</sup> When selecting and developing clinician leaders, the  
17 importance of emotional intelligence, social awareness and team communication should  
18 be considered.<sup>27</sup> These are skills that can be developed in physicians in training,  
19 beginning in medical school and continuing through all phases of training, including  
20 communication, mindfulness and reflection.<sup>18, 52-53</sup> Leaders' own well-being impacts  
21 their leadership effectiveness. One recent study demonstrated that 9.8% of the variation  
22 in a leader's leadership behavior scores as assessed by physicians on their team was  
23 related to their own independently assessed degree of burnout.<sup>25</sup> This observation  
24 suggests that burnout among leaders may result in sub-optimal leadership behavior  
25 which in turn increase the risk of burnout in their team members creating a vicious  
26 cycle. This finding suggest that leadership development initiatives should include

1  
2  
3 attention to the well-being of the leader in addition to cultivation of specific leadership  
4  
5 skills.<sup>51</sup>  
6  
7  
8  
9

10  
11 Our study has several limitations. First, although relatively high for a physician  
12 survey,<sup>53-56</sup> our response rate was 45%, which raises the potential for selection bias.<sup>57</sup>  
13  
14 Second, the cross-sectional and survey-based design of the study allows us only to assess  
15 associations between leadership evaluations and the outcomes. Third, all physicians  
16 surveyed were from healthcare organizations participating in the PWAC. Although  
17 some PWAC institutions are non-academic institutions, most are academic medical  
18 centers, which makes the generalizability of the results to non-academic settings  
19 unclear. Finally, since the age of the respondent along with gender can help reveal the  
20 identity of the physicians in small specialties, it was not made available for the analyses  
21 and remains a limitation of the study. Our study has several strengths. It is a large  
22 multi-center study of physicians from 11 healthcare organizations representing all  
23 medical specialties with reasonably high response rate, using validated instruments to  
24 assess burnout, professional fulfillment, and leadership behavior.  
25  
26  
27  
28  
29  
30  
31  
32  
33  
34  
35  
36  
37  
38  
39  
40  
41  
42  
43

## 44 CONCLUSION

45  
46  
47  
48

49 The leadership behaviors of physician supervisors have a strong relationship to their  
50 team members' burnout, professional fulfillment, and intent to leave. Female physicians  
51 report lower satisfaction with their leaders' leadership behaviors. Greater attention to  
52  
53  
54  
55  
56  
57  
58  
59  
60

1  
2  
3 leader selection, development, and performance evaluation represents a potentially  
4  
5 important approach to reducing occupational burnout and promoting professional  
6  
7 fulfillment in large healthcare organizations.  
8  
9  
10  
11  
12  
13  
14  
15  
16  
17  
18  
19  
20  
21  
22  
23  
24  
25  
26  
27  
28  
29  
30  
31  
32  
33  
34  
35  
36  
37  
38  
39  
40  
41  
42  
43  
44  
45  
46  
47  
48  
49  
50  
51  
52  
53  
54  
55  
56  
57  
58  
59  
60

1  
2  
3 **Tables and Figures:**  
4  
5

6 Table 1. Characteristics of the Respondents  
7

8  
9  
10  
11  
12  
13  
14  
15  
16  
17  
18  
19  
20  
21  
22  
23  
24  
25  
26  
27  
28  
29  
30  
31  
32  
33  
34  
35  
36  
37  
38  
39  
40  
41  
42  
43  
44  
45  
46  
47  
48  
49  
50  
51  
52  
53  
54  
55  
56  
57  
58  
59  
60

| Total N=5,416                               | N (%)      |
|---------------------------------------------|------------|
| Gender                                      |            |
| <i>Female</i>                               | 2710 (50)  |
| Male                                        | 2706 (50)  |
| <i>Specialty</i>                            |            |
| Anesthesiology                              | 407 (7.5)  |
| Dermatology                                 | 71 (1.3)   |
| Emergency Medicine                          | 322 (6.0)  |
| Medicine                                    | 1671(30.9) |
| Neurology                                   | 195 (3.6)  |
| OB-GYN                                      | 248 (4.6)  |
| Pathology                                   | 140 (2.6)  |
| Pediatrics                                  | 804 (14.9) |
| Psychiatry                                  | 136 (2.5)  |
| Radiation Oncology                          | 77 (1.4)   |
| Radiology                                   | 317 (5.9)  |
| Surgery                                     | 630 (11.6) |
| Missing Specialty                           | 398 (7.3)  |
| Leadership Behavior Mean Score (0-4) (SD)   | 2.7 (0.7)  |
| <i>Occupational Distress and Well-being</i> |            |
| Professional fulfillment                    |            |
| Mean score (0-10) (SD) <sup>2</sup>         | 6.6 (2.1)  |
| Professional Fulfillment Present (yes)      | 2280 (42)  |

|                                                       |           |
|-------------------------------------------------------|-----------|
| Burnout                                               |           |
| Mean score (0-10) (SD) <sup>1</sup>                   | 3.0 (1.9) |
| Burned Out (yes)                                      | 2174 (40) |
| Intent to Leave Current Organization within Two Years | 1694 (32) |

<sup>1</sup> higher score unfavorable

<sup>2</sup> higher score favorable

Table 2. Characteristics of the Respondents by the Tertiles of Supervisor Leadership Behavior Score (Scores ranked from lowest to highest)

| Total N=5,416      | Tertiles of Leadership Behavior Score <sup>1</sup> |                                                        |                                                       |                                        |
|--------------------|----------------------------------------------------|--------------------------------------------------------|-------------------------------------------------------|----------------------------------------|
|                    | Lowest 1/3<br>(Low Scores:<br>(0-2.3)<br>N (row %) | Middle 1/3<br>Medium Scores:<br>(2.4-3.2)<br>N (row %) | Highest 1/3<br>High Scores:<br>(3.3-4.0)<br>N (row %) | (Kramer's V)<br>Chi-square-<br>p-value |
| Sex                |                                                    |                                                        |                                                       |                                        |
| Female             | 994 (37)                                           | 972 (36)                                               | 744 (28)                                              | (0.07)<br>(<0.001)                     |
| Male               | 824 (31)                                           | 987 (37)                                               | 895 (33)                                              |                                        |
| Specialty          |                                                    |                                                        |                                                       |                                        |
| Anesthesiology     | 156 (38)                                           | 154 (38)                                               | 97 (24)                                               | (0.11)<br>(<0.001)                     |
| Dermatology        | 10 (14)                                            | 21 (30)                                                | 40 (56)                                               |                                        |
| Emergency Medicine | 66 (21)                                            | 144 (45)                                               | 112 (35)                                              |                                        |
| Medicine           | 625 (37)                                           | 593 (36)                                               | 453 (27)                                              |                                        |

|                                        |           |           |           |                    |
|----------------------------------------|-----------|-----------|-----------|--------------------|
| Neurology                              | 51 (26)   | 72 (37)   | 72 (37)   |                    |
| OB-GYN                                 | 98 (40)   | 83 (34)   | 67 (27)   |                    |
| Pathology                              | 32 (23)   | 51 (36)   | 57 (41)   |                    |
| Pediatrics                             | 241 (30)  | 306 (38)  | 257 (32)  |                    |
| Psychiatry                             | 43 (32)   | 44 (32)   | 49 (36)   |                    |
| Radiation Oncology                     | 23 (30)   | 29 (38)   | 25 (33)   |                    |
| Radiology                              | 89 (28)   | 114 (36)  | 114 (36)  |                    |
| Surgery                                | 214 (34)  | 209 (33)  | 207 (33)  |                    |
| Missing Specialty                      | 170 (43)  | 139 (35)  | 89 (22)   |                    |
| Professional Fulfillment               |           |           |           |                    |
| Mean score (0-10) (SD) <sup>3</sup>    | 5.6 (2.1) | 6.7 (1.8) | 7.7 (1.8) | <0.001             |
| Professional Fulfillment Present (yes) | 438 (19)  | 779 (34)  | 1063(47)  | (0.33)<br>(<0.001) |
| Burned Out                             |           |           |           |                    |
| Mean score (0-10) (SD) <sup>2</sup>    | 3.7 (2.0) | 3.0 (1.7) | 2.2 (1.7) | <0.001             |
| Burned Out (yes)                       | 1010(47)  | 766 (35)  | 398 (18)  | (0.26)<br>(<0.001) |
| Intent to Leave (yes)                  | 851 (50)  | 578 (34)  | 265 (16)  | (0.27)<br>(<0.001) |

<sup>1</sup> higher tertile favorable <sup>2</sup> higher score unfavorable

<sup>3</sup> higher score favorable



Table 3. Logistic Regression Models of Professional Fulfillment, Burnout and Intent to Leave

|                                                                    | Model 1<br>Professional<br>Fulfillment (yes)<br><br>N=5416 | Model 2<br>Burnout Status<br>(yes)<br><br>N=5416 | Model 3<br>Intent to Leave<br>(yes)<br><br>N=5374 |
|--------------------------------------------------------------------|------------------------------------------------------------|--------------------------------------------------|---------------------------------------------------|
| Variables                                                          | Odds Ratio<br>(95% CI) (p-val)                             | Odds Ratio<br>(95% CI) (p-val)                   | Odds Ratio<br>(95% CI) (p-val)                    |
| Female vs Male                                                     | 0.58 (0.51-0.66)<br>( $<0.001$ )                           | 1.57 (1.41-<br>1.76)<br>( $<0.001$ )             | 0.70 (0.60-<br>0.83)<br>( $<0.001$ )              |
| <b>Leadership Score</b><br>Tertile 1<br>(Lowest 1/3 of All Scores) | Reference                                                  | Reference                                        | Reference                                         |
| Tertile 2<br>(Middle 1/3 of All Scores)                            | 2.10 (1.85-2.37)<br>( $<0.001$ )                           | 0.52 (0.45-<br>0.61)<br>( $<0.001$ )             | 0.56 (0.48-<br>0.65)<br>( $<0.001$ )              |
| Tertile 3<br>(Highest 1/3 of All scores)                           | 5.80 (5.10-6.59)<br>( $<0.001$ )                           | 0.26 (0.23-<br>0.31)<br>( $<0.001$ )             | 0.34 (0.26-<br>0.44)<br>( $<0.001$ )              |
| Professional Fulfillment<br>Present (yes)                          | -----                                                      | -----                                            | 0.45 (0.40-<br>0.52)<br>( $<0.001$ )              |
| Burned out vs Not                                                  | -----                                                      | -----                                            | 2.43 (2.17-<br>2.71)<br>( $<0.001$ )              |
| Area under the curve<br>(ROC)                                      | 0.71                                                       | 0.66                                             | 0.74                                              |

1  
2  
3  
4  
5  
6 Figure 1. Likelihood (% , 95% CI) of Professional Fulfillment Status by the Tertiles of Supervisor  
7  
8 Leadership Behavior Score for Female and Male Physicians  
9

10  
11 Figure 2. Likelihood (% , 95% CI) of Burnout Status by the Tertiles of Supervisor Leadership  
12  
13 Behavior Score for Female and Male Physicians  
14

15 Figure 3. Likelihood (% , 95% CI) of Reporting Intent to Leave by the Tertiles Supervisor  
16  
17 Leadership Behavior Score for Female and Male Physicians  
18  
19  
20  
21  
22  
23  
24  
25  
26  
27  
28  
29  
30  
31  
32  
33  
34  
35  
36  
37  
38  
39  
40  
41  
42

## 43 **References**

44  
45  
46 1. Kane,C. Updated data on physician practice arrangements: for the first time, fewer  
47  
48 physicians are owners than employees. American Medical Association. *AMA Economic*  
49  
50 *and Health Policy Research*. 2019; 3. [https://www.ama-assn.org/system/files/2019-](https://www.ama-assn.org/system/files/2019-07/prp-fewer-owners-benchmark-survey-2018.pdf)  
51  
52  
53 07/prp-fewer-owners-benchmark-survey-2018.pdf  
54  
55  
56  
57  
58  
59  
60

1  
2  
3 2. Hawkins M. Survey of America's physicians: practice patterns and perspectives.

4  
5 [Published online 2016].

6  
7 [https://www.merrihawkins.com/uploadedFiles/Physicians%20Foundation%202016%20](https://www.merrihawkins.com/uploadedFiles/Physicians%20Foundation%202016%20Survey%20of%20Americas%20Physicians.pdf)  
8  
9  
10 [Survey%20of%20Americas%20Physicians.pdf](https://www.merrihawkins.com/uploadedFiles/Physicians%20Foundation%202016%20Survey%20of%20Americas%20Physicians.pdf)

11  
12  
13 3. Shanafelt T, Goh J, Sinsky C. The business case for investing in physician well-  
14  
15 being. *JAMA Intern Med.* 2017;177(12):1826-1832.

16  
17 doi:10.1001/jamainternmed.2017.4340

18  
19  
20 4. Maslach, C. and Jackson, S.E. The measurement of experienced burnout. J.

21  
22 *Organiz. Behav.* 1981; 2: 99-113. <https://doi.org/10.1002/job.4030020205>

23  
24  
25  
26 5. Tawfik DS, Scheid A, Profit J, et al. Evidence relating health care provider burnout  
27  
28 and quality of care: a systematic review and meta-analysis. *Ann Intern Med.* 2019 Oct  
29  
30 15;171(8):555-567. doi: 10.7326/M19-1152. Epub 2019 Oct 8. PMID: 31590181;

31  
32  
33 PMID: PMC7138707.

34  
35 6. Shanafelt TD, Balch CM, Bechamps G, et al. Burnout and medical errors among  
36  
37 American surgeons. *Ann Surg.* 2010;251(6):995-1000.

38  
39  
40 doi:10.1097/SLA.0b013e3181bfdab3

41  
42  
43 7. Bohman B, Dyrbye L, Sinsky CA. Physician Well-Being: The Reciprocity of Practice  
44  
45 Efficiency, Culture of Wellness, and Personal Resilience. *NJEM Catal.* Published online  
46  
47 2017. Accessed January 20, 2021.

48  
49 [https://catalyst.nejm.org/doi/full/10.1056/CAT.17.0429?casa\\_token=MIYGT-](https://catalyst.nejm.org/doi/full/10.1056/CAT.17.0429?casa_token=MIYGT-)

50  
51 [8qk\\_cAAAAA:1QuLaP1w5Dg6R3KqgMyc5u\\_MsH-y5Wa8Q3Em-](https://catalyst.nejm.org/doi/full/10.1056/CAT.17.0429?casa_token=MIYGT-8qk_cAAAAA:1QuLaP1w5Dg6R3KqgMyc5u_MsH-y5Wa8Q3Em-)

52  
53 [rPqf2R\\_Vx\\_McVKsM3eUijpqCW8PEc6W3WB7rbSM](https://catalyst.nejm.org/doi/full/10.1056/CAT.17.0429?casa_token=MIYGT-8qk_cAAAAA:1QuLaP1w5Dg6R3KqgMyc5u_MsH-y5Wa8Q3Em-rPqf2R_Vx_McVKsM3eUijpqCW8PEc6W3WB7rbSM)  
54  
55  
56  
57  
58  
59  
60

- 1  
2  
3 8. Hamidi MS, Bohman B, Sandborg C et al. Estimating institutional physician turnover  
4  
5 attributable to self-reported burnout and associated financial burden: a case study. *BMC*  
6  
7 *Health Serv Res.* 2018 Nov 27;18(1):851. doi: 10.1186/s12913-018-3663-z. PMID:  
8  
9 30477483; PMCID: PMC6258170.  
10  
11
- 12 9. Jackson TN, Pearcy CP, Khorgami Z, Agrawal V, Taubman KE, Truitt MS. The  
13  
14 Physician Attrition Crisis: A Cross-Sectional Survey of the Risk Factors for Reduced Job  
15  
16 Satisfaction Among US Surgeons. *World J Surg.* 2018;42(5):1285-1292.  
17  
18 doi:10.1007/s00268-017-4286-y  
19  
20
- 21 10. Shanafelt TD, Mungo M, Schmitgen J, et al. Longitudinal study evaluating the  
22  
23 association between physician burnout and changes in professional work effort. *Mayo*  
24  
25 *Clin Proc.* 2016 Apr;91(4):422-31. doi: 10.1016/j.mayocp.2016.02.001. PMID:  
26  
27 27046522.  
28  
29
- 30 11. Haas JS, Cook EF, Puopolo AL, Burstin HR, Cleary PD, Brennan TA. Is the  
31  
32 professional satisfaction of general internists associated with patient satisfaction? *J Gen*  
33  
34 *Intern Med.* 2000;15(2):122-128. doi:10.1046/j.1525-1497.2000.02219.x  
35  
36  
37
- 38 12. Welle D, Trockel MT, Hamidi MS, et al. Association of occupational distress and  
39  
40 sleep-related impairment in physicians with unsolicited patient complaints. *Mayo Clin*  
41  
42 *Proc.* 2020;95(4):719-726. doi:10.1016/j.mayocp.2019.09.025  
43  
44
- 45 13. Windover AK, Martinez K, Mercer MB, Neuendorf K, Boissy A, Rothberg MB.  
46  
47 Correlates and outcomes of physician burnout within a large academic medical  
48  
49 center. *JAMA Intern Med.* 2018;178(6):856-858. doi:10.1001/jamainternmed.2018.0019  
50  
51  
52  
53  
54  
55  
56  
57  
58  
59

- 1  
2  
3 14. Han S, Shanafelt TD, Sinsky CA, et al. Estimating the attributable cost of physician  
4 burnout in the United States. *Ann Intern Med.* 2019;170(11):784-790. doi:10.7326/M18-  
5 1422  
6  
7  
8  
9  
10 15. Dyrbye LN, West CP, Hunderfund AL, et al. Relationship between burnout,  
11 professional behaviors, and cost-conscious attitudes among US Physicians. *J Gen*  
12 *Intern Med.* 2020;35(5):1465-1476. doi:10.1007/s11606-019-05376-x  
13  
14  
15  
16  
17 16. West CP, Huschka MM, Novotny PJ, et al. Association of perceived medical errors  
18 with resident distress and empathy: a prospective longitudinal study. *JAMA.*  
19  
20  
21 2006;296(9):1071-1078. doi:10.1001/jama.296.9.1071  
22  
23  
24 17. Menon NK, Shanafelt TD, Sinsky CA, et al. Association of physician burnout with  
25 suicidal ideation and medical errors. *JAMA Netw Open.* 2020;3(12):e2028780.  
26  
27  
28  
29  
30  
31  
32 18. Shanafelt TD, Noseworthy J. Executive leadership and physician well-being: nine  
33 organizational strategies to promote engagement and reduce burnout. *Mayo Clinic*  
34 *proceedings.* doi:10.1016/j.mayocp.2016.10.004  
35  
36  
37  
38  
39 19. Km A. Physician well-being: organizational strategies for physician burnout. *FP*  
40 *essentials.* Published August 2018. Accessed January 20, 2021.  
41  
42  
43  
44  
45  
46  
47 20. Mari S, Meyen R, Kim B. Resident-led organizational initiatives to reduce burnout  
48 and improve wellness. *BMC Med Educ.* 2019;19(1):437. doi:10.1186/s12909-019-1756-  
49  
50  
51  
52  
53  
54  
55  
56  
57  
58  
59  
60

- 1  
2  
3 21. DeChant PF, Acs A, Rhee KB, et al. Effect of organization-directed workplace  
4 interventions on physician burnout: a systematic review. *Mayo Clin Proc Innov Qual*  
5 *Outcomes*. 2019;3(4):384-408. doi:10.1016/j.mayocpiqo.2019.07.006  
6  
7  
8  
9  
10  
11 22. Shanafelt T, Stolz S, Springer J, Murphy D, Bohman B, Trockel M. A Blueprint for  
12 organizational strategies to promote the well-being of health care professionals. *NEJM*  
13 *Catalyst Innovations in Care Delivery*. 2020 Oct 21;1(6).  
14  
15  
16  
17  
18  
19  
20 23. Swensen SJ, Shanafelt TD. Mayo Clinic Strategies to Reduce Burnout: 12 Actions  
21 to Create the Idea Workplace. Oxford University Press; 2020.  
22  
23  
24  
25 24. Shanafelt TD, Gorringer G, Menaker R, et al. Impact of organizational leadership on  
26 physician burnout and satisfaction. *Mayo Clin Proc*. 2015;90(4):432-440.  
27  
28  
29  
30  
31  
32  
33 25. Shanafelt TD, Makowski MS, Wang H, et al. Association of burnout, professional  
34 fulfillment, and self-care practices of physician leaders with their independently rated  
35 leadership effectiveness. *JAMA Netw Open*. 2020;3(6):e207961.  
36  
37  
38  
39  
40  
41  
42  
43 26. Shanafelt TD, Wang H, Leonard M, et al. Assessment of the association of  
44 leadership behaviors of supervising physicians With personal-organizational values  
45 alignment among staff physicians. *JAMA Netw Open*. 2021 Feb 1;4(2):e2035622. doi:  
46  
47  
48  
49  
50  
51  
52 27. Stoller JK. Help wanted: developing clinician leaders. *Perspect Med Educ*.  
53  
54  
55  
56  
57  
58  
59  
60

1  
2  
3 28. Edelman CM, Boen F, Fransen K. The Power of Empowerment: Predictors and  
4 Benefits of Shared Leadership in Organizations. *Front Psychol.* 2020;11:582894.

5  
6  
7 doi:10.3389/fpsyg.2020.582894

8  
9  
10 29. White BAA, Bledsoe C, Hendricks R, Arroliga AC. A leadership education  
11 framework addressing relationship management, burnout, and team trust. *Proc Bayl*  
12 *Univ Med Cent.* 2019;32(2):298-300. doi:10.1080/08998280.2018.1550346

13  
14  
15 30. Trockel MT, Menon NK, Rowe SG, et al. Assessment of physician sleep and  
16 wellness, burnout, and clinically significant medical errors. *JAMA Netw Open.*  
17  
18 2020;3(12):e2028111. Published 2020 Dec 1.

19  
20  
21  
22  
23  
24  
25  
26  
27  
28  
29  
30  
31  
32  
33  
34  
35  
36  
37  
38  
39  
40  
41  
42  
43  
44  
45  
46  
47  
48  
49  
50  
51  
52  
53  
54  
55  
56  
57  
58  
59  
60  
doi:10.1001/jamanetworkopen.2020.28111

31. Trockel M, Bohman B, Lesure E, et al. A brief instrument to assess both burnout  
and professional fulfillment in physicians: reliability and validity, including correlation  
with self-reported medical errors, in a sample of resident and practicing physicians.  
*Acad Psychiatry.* 2018;42(1):11-24. doi:10.1007/s40596-017-0849-3

32. Trockel MT, Hamidi MS, Menon NK, et al. Self-valuation: Attending to the Most  
Important Instrument in the Practice of Medicine. *Mayo Clin Proc.* 2019;94(10):2022-  
2031. doi:10.1016/j.mayocp.2019.04.040

doi:10.1001/jamanetworkopen.2020.28111

33. Dyrbye LN, Major-Elechi B, Hays JT, Fraser CH, Buskirk SJ, West CP. Relationship  
between organizational leadership and health care employee burnout and satisfaction.  
*Mayo Clin Proc.* 2020;95(4):698-708. doi:10.1016/j.mayocp.2019.10.041

- 1  
2  
3 34. Siegel TR, Nagengast AK. Mitigating burnout. *Surg Clin North Am*. 2019;99(5):1029-  
4  
5 1035. doi:10.1016/j.suc.2019.06.015  
6  
7  
8  
9 35. Rittenhouse DR, Mertz E, Keane D, Grumbach K. No exit: an evaluation of  
10  
11 measures of physician attrition. *Health Serv Res*. 2004;39(5):1571-1588.  
12  
13 doi:10.1111/j.1475-6773.2004.00304.x  
14  
15  
16 36. Gill JM, Mainous AG III. The role of provider continuity in preventing hospitalizations.  
17  
18 *Arch Fam Med*. 1998;7(4):352-357.  
19  
20  
21 37. Raddish M, Horn SD, Sharkey PD. Continuity of care: is it cost effective? *Am J*  
22  
23 *Manag Care*. 1999;5(6):727-734.  
24  
25  
26 48. Buchbinder SB, Wilson M, Melick CF, Powe NR. Estimates of costs of primary care  
27  
28 physician turnover. *Am J Manag Care*. 1999;5(11):1431-1438.  
29  
30  
31 39. Misra-Hebert AD, Kay R, Stoller JK. A review of physician turnover: rates, causes,  
32  
33 and consequences. *Am J Med Qual*. 2004;19(2):56-66.  
34  
35  
36  
37 40. Atkinson W, Misra-Hebert A, Stoller JK. The impact on revenue of physician  
38  
39 turnover: an assessment model and experience in a large healthcare center. *J Med*  
40  
41 *Pract Manage*. 2006;21(6):351-355.  
42  
43  
44  
45 41. Person SD, Jordan CG, Allison JJ, et al. Measuring diversity and inclusion in  
46  
47 academic medicine: the diversity engagement survey (DES). *Acad Med J Assoc Am*  
48  
49 *Med Coll*. 2015;90(12):1675-1683. doi:10.1097/ACM.0000000000000921  
50  
51  
52 42. Tesch BJ, Wood HM, Helwig AL, Nattinger AB. Promotion of women physicians in  
53  
54 academic medicine. Glass ceiling or sticky floor? *JAMA*. 1995;273(13):1022-1025.  
55  
56  
57  
58  
59



- 1  
2  
3 43. Frank E, Zhao Z, Sen S, Guille C. Gender Disparities in Work and Parental Status  
4 Among Early Career Physicians. *JAMA Netw Open*. 2019;2(8).  
5  
6 doi:10.1001/jamanetworkopen.2019.8340  
7  
8  
9  
10 44. Mueller CM, Gaudilliere DK, Kin C, Menorca R, Girod S. Gender disparities in  
11 scholarly productivity of US academic surgeons. *J Surg Res*. 2016;203(1):28-33.  
12  
13 doi:10.1016/j.jss.2016.03.060  
14  
15  
16  
17 45. Cochran A, Hauschild T, Elder WB, Neumayer LA, Brasel KJ, Crandall ML.  
18 Perceived gender-based barriers to careers in academic surgery. *Am J Surg*.  
19  
20 2013;206(2):263-268. doi:10.1016/j.amjsurg.2012.07.044  
21  
22  
23  
24 46. Zhuge Y, Kaufman J, Simeone DM, Chen H, Velazquez OC. Is there still a glass  
25 ceiling for women in academic surgery? *Ann Surg*. 2011;253(4):637-643.  
26  
27 doi:10.1097/SLA.0b013e3182111120  
28  
29  
30  
31 47. Liang R, Dornan T, Nestel D. Why do women leave surgical training? A qualitative  
32 and feminist study. *Lancet*. 2019;393(10171):541-549. doi:10.1016/S0140-  
33  
34 6736(18)32612-6  
35  
36  
37  
38 48. Bingmer K, Wojnarski CM, Brady JT, Stein SL, Ho VP, Steinhagen E. A Model for a  
39 formal mentorship program in surgical residency. *J Surg Res*. 2019;243:64-70.  
40  
41 doi:10.1016/j.jss.2019.04.068  
42  
43  
44  
45 49. Khoushal Z, Hussain MA, Greco E, et al. Prevalence and causes of attrition  
46 among surgical residents: A Systematic Review and Meta-analysis. *JAMA Surg*.  
47  
48 2017;152(3):265-272. doi:10.1001/jamasurg.2016.4086  
49  
50  
51  
52  
53  
54  
55  
56  
57  
58  
59  
60

- 1  
2  
3 50. Templeton K, Bernstein CA, Sukhera J, et al. Gender-based differences in burnout:  
4  
5 issues faced by women physicians. *NAM Perspect*. Published online May 30, 2019.  
6  
7 doi:10.31478/201905a  
8  
9  
10  
11 51. Shanafelt T, Trockel M, Rodriguez A, Logan D. Wellness-centered leadership:  
12  
13 equipping health care leaders to cultivate physician well-being and professional  
14  
15 fulfillment. *Acad Med*. 2021;96(5):641-651. doi:10.1097/ACM.0000000000003907  
16  
17  
18 52. Smith, C. D., C. Balatbat, S. Corbridge, et al. Implementing optimal team-based  
19  
20 care to reduce clinician burnout. *NAM Perspectives*. 2018 Discussion Paper, National  
21  
22 Academy of Medicine, Washington, DC. <https://doi.org/10.31478/201809c>  
23  
24  
25 53. Shanafelt T, Swensen S. Leadership and physician burnout: using the annual  
26  
27 review to reduce burnout and promote engagement. *Am J Med Qual*. 2017;32(5):563-  
28  
29 565. doi:10.1177/1062860617691605  
30  
31  
32  
33 54. Allegra C, Hall R, Yothers G. Prevalence of burnout in the US oncology community:  
34  
35 results of a 2003 survey. *J Onc Pract*. 2005;1:140-147.  
36  
37  
38 55. Kuerer HM, Eberlein TJ, Pollock RE, et al. Career satisfaction, practice patterns and  
39  
40 burnout among surgical oncologists: report on the quality of life of members of the  
41  
42 Society of Surgical Oncology. *Ann Surg Oncol*. 2007;14(11):3043-3053  
43  
44  
45 56. Shanafelt TD, Balch CM, Bechamps GJ, et al. Burnout and career satisfaction  
46  
47 among American surgeons. *Annals of Surgery*. 2009;250(3):463-471.  
48  
49  
50  
51 57. Asch D, Jedrzejewski M, Christakis N. Response rates to mail surveys published in  
52  
53 medical journals. *J Clin Epidemiol*. 1997;50:1129-1136.  
54  
55  
56  
57  
58  
59  
60

1  
2  
3  
4  
5  
6  
7  
8  
9  
10  
11  
12  
13  
14  
15  
16  
17  
18  
19  
20  
21  
22  
23  
24  
25  
26  
27  
28  
29  
30  
31  
32  
33  
34  
35  
36  
37  
38  
39  
40  
41  
42  
43  
44  
45  
46  
47  
48  
49  
50  
51  
52  
53  
54  
55  
56  
57  
58  
59  
60

For peer review only

1  
2  
3  
4  
5  
6  
7  
8  
9  
10  
11  
12  
13  
14  
15  
16  
17  
18  
19  
20  
21  
22  
23  
24  
25  
26  
27  
28  
29  
30  
31  
32  
33  
34  
35  
36  
37  
38  
39  
40  
41  
42  
43  
44  
45  
46  
47  
48  
49  
50  
51  
52  
53  
54  
55  
56  
57  
58  
59  
60

**Figure 1. Predicted Percentage of Physicians (% , 95% CI) with High Professional Fulfillment by the Tertiles of Supervisor Leadership Behavior Ratings for Female and Male Physicians**

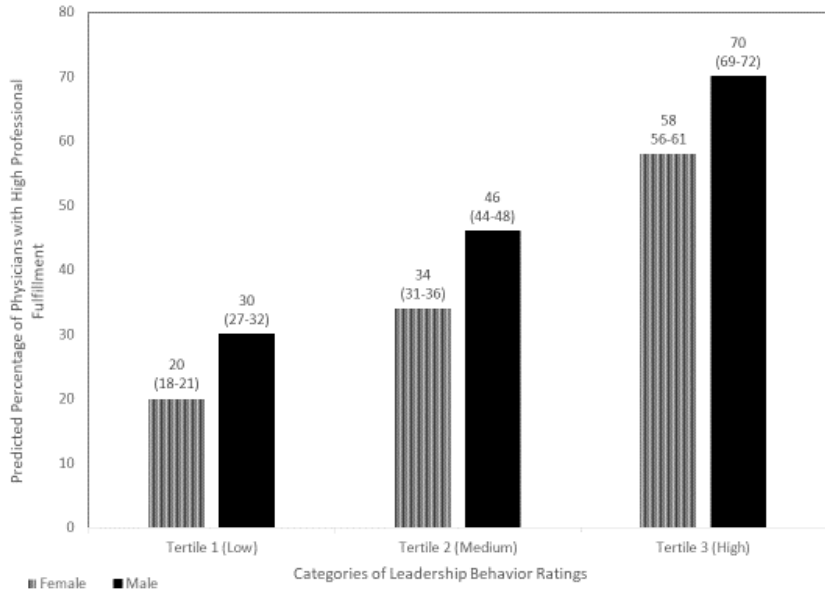

Review only

1  
2  
3  
4  
5  
6  
7  
8  
9  
10  
11  
12  
13  
14  
15  
16  
17  
18  
19  
20  
21  
22  
23  
24  
25  
26  
27  
28  
29  
30  
31  
32  
33  
34  
35  
36  
37  
38  
39  
40  
41  
42  
43  
44  
45  
46  
47  
48  
49  
50  
51  
52  
53  
54  
55  
56  
57  
58  
59  
60

For peer review only

**Figure 2. Predicted Percentage of Physicians (% , 95% CI) with Burnout by the Tertiles of Supervisor Leadership Behavior Ratings for Female and Male Physicians**

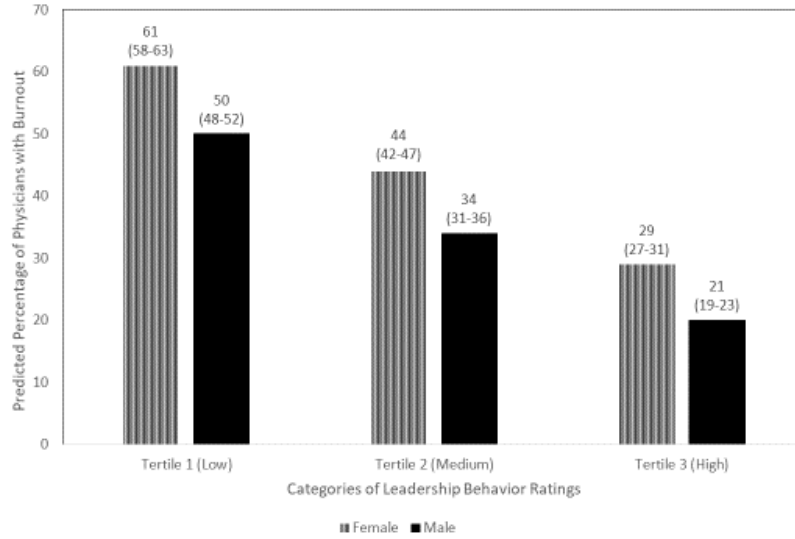

Review only

**Figure 3. Predicted Percentage of Physicians (% , 95% CI) Reporting Intent to Leave by the Tertiles of Supervisor Leadership Behavior Ratings for Female and Male Physicians**

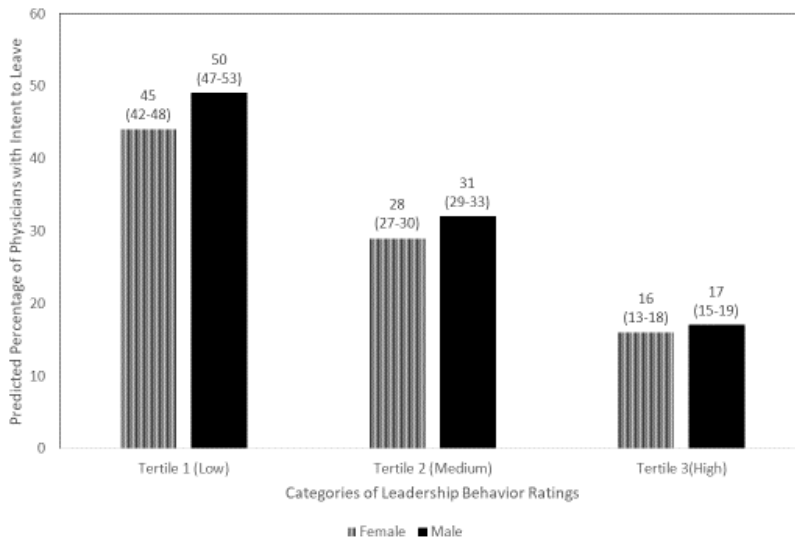

Review only

STROBE Statement—checklist of items that should be included in reports of observational studies

|                           | Item No. | Recommendation                                                                                                                                                                                                                                                                                                                                                                                                                                                                                                                                                                                                                                                                                       | Page No.     | Relevant text from manuscript |
|---------------------------|----------|------------------------------------------------------------------------------------------------------------------------------------------------------------------------------------------------------------------------------------------------------------------------------------------------------------------------------------------------------------------------------------------------------------------------------------------------------------------------------------------------------------------------------------------------------------------------------------------------------------------------------------------------------------------------------------------------------|--------------|-------------------------------|
| <b>Title and abstract</b> | 1        | (a) Indicate the study’s design with a commonly used term in the title or the abstract                                                                                                                                                                                                                                                                                                                                                                                                                                                                                                                                                                                                               | 1            |                               |
|                           |          | (b) Provide in the abstract an informative and balanced summary of what was done and what was found                                                                                                                                                                                                                                                                                                                                                                                                                                                                                                                                                                                                  | 5            |                               |
| <b>Introduction</b>       |          |                                                                                                                                                                                                                                                                                                                                                                                                                                                                                                                                                                                                                                                                                                      |              |                               |
| Background/rationale      | 2        | Explain the scientific background and rationale for the investigation being reported                                                                                                                                                                                                                                                                                                                                                                                                                                                                                                                                                                                                                 | 7            |                               |
| Objectives                | 3        | State specific objectives, including any prespecified hypotheses                                                                                                                                                                                                                                                                                                                                                                                                                                                                                                                                                                                                                                     | 8            |                               |
| <b>Methods</b>            |          |                                                                                                                                                                                                                                                                                                                                                                                                                                                                                                                                                                                                                                                                                                      |              |                               |
| Study design              | 4        | Present key elements of study design early in the paper                                                                                                                                                                                                                                                                                                                                                                                                                                                                                                                                                                                                                                              | 8            |                               |
| Setting                   | 5        | Describe the setting, locations, and relevant dates, including periods of recruitment, exposure, follow-up, and data collection                                                                                                                                                                                                                                                                                                                                                                                                                                                                                                                                                                      | 8-9          |                               |
| Participants              | 6        | (9) <i>Cohort study</i> —Give the eligibility criteria, and the sources and methods of selection of participants. Describe methods of follow-up<br><i>Case-control study</i> —Give the eligibility criteria, and the sources and methods of case ascertainment and control selection. Give the rationale for the choice of cases and controls<br><i>Cross-sectional study</i> —Give the eligibility criteria, and the sources and methods of selection of participants<br><br>(b) <i>Cohort study</i> —For matched studies, give matching criteria and number of exposed and unexposed<br><i>Case-control study</i> —For matched studies, give matching criteria and the number of controls per case | 8-9          |                               |
| Variables                 | 7        | Clearly define all outcomes, exposures, predictors, potential confounders, and effect modifiers. Give diagnostic criteria, if applicable                                                                                                                                                                                                                                                                                                                                                                                                                                                                                                                                                             | 9-10         |                               |
| Data sources/ measurement | 8*       | For each variable of interest, give sources of data and details of methods of assessment (measurement). Describe comparability of assessment methods if there is more than one group                                                                                                                                                                                                                                                                                                                                                                                                                                                                                                                 | 10           |                               |
| Bias                      | 9        | Describe any efforts to address potential sources of bias                                                                                                                                                                                                                                                                                                                                                                                                                                                                                                                                                                                                                                            | 10-11, 16-18 |                               |
| Study size                | 10       | Explain how the study size was arrived at                                                                                                                                                                                                                                                                                                                                                                                                                                                                                                                                                                                                                                                            | 8-9, 11      |                               |

Continued on next page



|    |                        |     |                                                                                                                                                                                                              |
|----|------------------------|-----|--------------------------------------------------------------------------------------------------------------------------------------------------------------------------------------------------------------|
| 1  |                        |     |                                                                                                                                                                                                              |
| 2  | Quantitative variables | 11  | Explain how quantitative variables were handled in the analyses. If applicable, describe which groupings were chosen and why                                                                                 |
| 3  |                        |     |                                                                                                                                                                                                              |
| 4  | Statistical methods    | 12  | (a) Describe all statistical methods, including those used to control for confounding                                                                                                                        |
| 5  |                        |     | (b) Describe any methods used to examine subgroups and interactions                                                                                                                                          |
| 6  |                        |     | (c) Explain how missing data were addressed                                                                                                                                                                  |
| 7  |                        |     | (d) <i>Cohort study</i> —If applicable, explain how loss to follow-up was addressed                                                                                                                          |
| 8  |                        |     | <i>Case-control study</i> —If applicable, explain how matching of cases and controls was addressed                                                                                                           |
| 9  |                        |     | <i>Cross-sectional study</i> —If applicable, describe analytical methods taking account of sampling strategy (Not applicable)                                                                                |
| 10 |                        |     | (e) Describe any sensitivity analyses (Not applicable)                                                                                                                                                       |
| 11 |                        |     |                                                                                                                                                                                                              |
| 12 |                        |     |                                                                                                                                                                                                              |
| 13 |                        |     |                                                                                                                                                                                                              |
| 14 |                        |     |                                                                                                                                                                                                              |
| 15 | <b>Results</b>         |     |                                                                                                                                                                                                              |
| 16 | Participants           | 13* | (a) Report numbers of individuals at each stage of study—eg numbers potentially eligible, examined for eligibility, confirmed eligible, included in the study, completing follow-up, and analysed            |
| 17 |                        |     | (b) Give reasons for non-participation at each stage                                                                                                                                                         |
| 18 |                        |     | (c) Consider use of a flow diagram                                                                                                                                                                           |
| 19 | Descriptive data       | 14* | (a) Give characteristics of study participants (eg demographic, clinical, social) and information on exposures and potential confounders                                                                     |
| 20 |                        |     | (b) Indicate number of participants with missing data for each variable of interest                                                                                                                          |
| 21 |                        |     | (c) <i>Cohort study</i> —Summarise follow-up time (eg, average and total amount)                                                                                                                             |
| 22 | Outcome data           | 15* | <i>Cohort study</i> —Report numbers of outcome events or summary measures over time                                                                                                                          |
| 23 |                        |     | <i>Case-control study</i> —Report numbers in each exposure category, or summary measures of exposure                                                                                                         |
| 24 |                        |     | <i>Cross-sectional study</i> —Report numbers of outcome events or summary measures                                                                                                                           |
| 25 | Main results           | 16  | (a) Give unadjusted estimates and, if applicable, confounder-adjusted estimates and their precision (eg, 95% confidence interval). Make clear which confounders were adjusted for and why they were included |
| 26 |                        |     | (b) Report category boundaries when continuous variables were categorized                                                                                                                                    |
| 27 |                        |     | (c) If relevant, consider translating estimates of relative risk into absolute risk for a meaningful time period                                                                                             |
| 28 |                        |     |                                                                                                                                                                                                              |
| 29 |                        |     |                                                                                                                                                                                                              |
| 30 |                        |     |                                                                                                                                                                                                              |
| 31 |                        |     |                                                                                                                                                                                                              |
| 32 |                        |     |                                                                                                                                                                                                              |
| 33 |                        |     |                                                                                                                                                                                                              |
| 34 |                        |     |                                                                                                                                                                                                              |
| 35 |                        |     |                                                                                                                                                                                                              |
| 36 |                        |     |                                                                                                                                                                                                              |
| 37 |                        |     |                                                                                                                                                                                                              |
| 38 |                        |     |                                                                                                                                                                                                              |
| 39 |                        |     |                                                                                                                                                                                                              |
| 40 |                        |     |                                                                                                                                                                                                              |
| 41 |                        |     |                                                                                                                                                                                                              |
| 42 |                        |     |                                                                                                                                                                                                              |
| 43 |                        |     |                                                                                                                                                                                                              |
| 44 |                        |     |                                                                                                                                                                                                              |
| 45 |                        |     |                                                                                                                                                                                                              |
| 46 |                        |     |                                                                                                                                                                                                              |

---

separately)

---

Continued on next page

For peer review only

|                          |    |                                                                                                                                                                            |    |
|--------------------------|----|----------------------------------------------------------------------------------------------------------------------------------------------------------------------------|----|
| Other analyses           | 17 | Report other analyses done—eg analyses of subgroups and interactions, and sensitivity analyses                                                                             | 15 |
| <b>Discussion</b>        |    |                                                                                                                                                                            |    |
| Key results              | 18 | Summarise key results with reference to study objectives                                                                                                                   | 16 |
| Limitations              | 19 | Discuss limitations of the study, taking into account sources of potential bias or imprecision. Discuss both direction and magnitude of any potential bias                 | 18 |
| Interpretation           | 20 | Give a cautious overall interpretation of results considering objectives, limitations, multiplicity of analyses, results from similar studies, and other relevant evidence | 17 |
| Generalisability         | 21 | Discuss the generalisability (external validity) of the study results                                                                                                      | 18 |
| <b>Other information</b> |    |                                                                                                                                                                            |    |
| Funding                  | 22 | Give the source of funding and the role of the funders for the present study and, if applicable, for the original study on which the present article is based              | 2  |

\*Give information separately for cases and controls in case-control studies and, if applicable, for exposed and unexposed groups in cohort and cross-sectional studies.

**Note:** An Explanation and Elaboration article discusses each checklist item and gives methodological background and published examples of transparent reporting. The STROBE checklist is best used in conjunction with this article (freely available on the Web sites of PLoS Medicine at <http://www.plosmedicine.org/>, Annals of Internal Medicine at <http://www.annals.org/>, and Epidemiology at <http://www.epidem.com/>). Information on the STROBE Initiative is available at [www.strobe-statement.org](http://www.strobe-statement.org).

# BMJ Open

## The impact of leadership behavior on physician wellbeing, burnout, professional fulfillment and intent to leave: a multi-center cross-sectional survey study

|                                 |                                                                                                                                                                                                                                                                                                |
|---------------------------------|------------------------------------------------------------------------------------------------------------------------------------------------------------------------------------------------------------------------------------------------------------------------------------------------|
| Journal:                        | <i>BMJ Open</i>                                                                                                                                                                                                                                                                                |
| Manuscript ID                   | bmjopen-2021-057554.R2                                                                                                                                                                                                                                                                         |
| Article Type:                   | Original research                                                                                                                                                                                                                                                                              |
| Date Submitted by the Author:   | 21-Apr-2022                                                                                                                                                                                                                                                                                    |
| Complete List of Authors:       | Mete, Mihriye; MedStar Health Research Institute; Georgetown University Medical Center, Department of Psychiatry<br>Goldman, Charlotte; MedStar Georgetown University Hospital, Shanafelt, Tait ; Stanford University, Medicine<br>Marchalik, Daniel; Georgetown University School of Medicine |
| <b>Primary Subject Heading</b>: | Health services research                                                                                                                                                                                                                                                                       |
| Secondary Subject Heading:      | Mental health, Medical education and training, Health services research                                                                                                                                                                                                                        |
| Keywords:                       | Human resource management < HEALTH SERVICES ADMINISTRATION & MANAGEMENT, Organisational development < HEALTH SERVICES ADMINISTRATION & MANAGEMENT, Quality in health care < HEALTH SERVICES ADMINISTRATION & MANAGEMENT, HEALTH SERVICES ADMINISTRATION & MANAGEMENT                           |
|                                 |                                                                                                                                                                                                                                                                                                |

SCHOLARONE™  
Manuscripts



I, the Submitting Author has the right to grant and does grant on behalf of all authors of the Work (as defined in the below author licence), an exclusive licence and/or a non-exclusive licence for contributions from authors who are: i) UK Crown employees; ii) where BMJ has agreed a CC-BY licence shall apply, and/or iii) in accordance with the terms applicable for US Federal Government officers or employees acting as part of their official duties; on a worldwide, perpetual, irrevocable, royalty-free basis to BMJ Publishing Group Ltd ("BMJ") its licensees and where the relevant Journal is co-owned by BMJ to the co-owners of the Journal, to publish the Work in this journal and any other BMJ products and to exploit all rights, as set out in our [licence](#).

The Submitting Author accepts and understands that any supply made under these terms is made by BMJ to the Submitting Author unless you are acting as an employee on behalf of your employer or a postgraduate student of an affiliated institution which is paying any applicable article publishing charge ("APC") for Open Access articles. Where the Submitting Author wishes to make the Work available on an Open Access basis (and intends to pay the relevant APC), the terms of reuse of such Open Access shall be governed by a Creative Commons licence – details of these licences and which [Creative Commons](#) licence will apply to this Work are set out in our licence referred to above.

Other than as permitted in any relevant BMJ Author's Self Archiving Policies, I confirm this Work has not been accepted for publication elsewhere, is not being considered for publication elsewhere and does not duplicate material already published. I confirm all authors consent to publication of this Work and authorise the granting of this licence.

1  
2  
3 **Title:** The impact of leadership behavior on physician wellbeing, burnout, professional  
4 fulfillment and intent to leave: a multi-center cross-sectional survey study  
5  
6  
7  
8  
9  
10  
11

12 \*Mihriye Mete, PhD<sup>1,2</sup>, Charlotte Goldman, MD<sup>3</sup>, \*\*Tait D. Shanafelt, MD<sup>4</sup>, \*\*Daniel  
13 Marchalik, MD<sup>3</sup>  
14  
15  
16  
17  
18

19 *Affiliations:*  
20  
21  
22  
23

24 <sup>1</sup> MedStar Health Research Institute, Hyattsville, Maryland  
25

26 <sup>2</sup> Department of Psychiatry, Georgetown University Medical Center  
27

28 <sup>3</sup> Department of Urology, MedStar Health, MedStar Georgetown University Hospital  
29

30 <sup>4</sup> Department of Medicine, Stanford University School of Medicine, Stanford, California  
31  
32  
33  
34  
35  
36  
37  
38  
39

40 \*Corresponding Author:  
41

42 Mihriye Mete, PhD  
43

44 Director, Behavioral Health Research  
45

46 MedStar Health Research Institute  
47

48 Mihriye.mete@medstar.net  
49  
50

51 Words: 2975/3000  
52  
53

54 \*\* Dr. Marchalik and Dr. Shanafelt are shared co-last authors.  
55  
56  
57  
58  
59  
60

1  
2  
3  
4  
5  
6 **Abstract:**  
7

8  
9 **Objective:** To examine how perceived leadership behaviors affect burnout,  
10 professional fulfillment and intent to leave the organization among physicians.  
11

12  
13 **Design:** Anonymous cross-sectional survey study from November 2016 to October  
14 2018.  
15

16  
17 **Setting:** 12,036 attending and resident physicians at eleven healthcare organizations  
18 participating in the Physician Wellness Academic Consortium (PWAC) were surveyed to  
19 assess burnout and professional fulfillment and their drivers.  
20

21  
22 **Participants:** A sample of 5416 attending physicians with complete data on gender,  
23 specialty, leadership, burnout and professional fulfillment.  
24

25  
26 **Main Outcomes and Measures:** The leadership behavior of each physician's  
27 supervisor was assessed using the Mayo Clinic Participatory Management Leadership  
28 Index and categorized in tertiles. Multivariable logistic regression analyses examined  
29 the effect of leadership behavior rating of each physician's supervisor on burnout,  
30 professional fulfillment, and intent to leave controlling for gender and specialty.  
31

32  
33 **Results:** The response rate was 45% across 11 institutions. Half of respondents were  
34 female. Professional fulfillment increased with increasing tertiles of leadership behavior  
35 rating (19%, 34%, 47%  $p < 0.001$ ). The odds of professional fulfillment were 5.8 times  
36 higher (OR=5.8, 95%CI 5.1-6.59) for physicians in the top tertile compared to those in  
37 the lowest tertile. Physicians in the top tertile were also 48% less likely to be burned out  
38 (OR=0.52, 95%CI 0.45-0.61) and reported 66% lower intent to leave (OR=0.34, 95% CI  
39 0.26-0.44). Individuals who rated their supervisor's leadership in upper tertiles relative to  
40  
41  
42  
43  
44  
45  
46  
47  
48  
49  
50  
51  
52  
53  
54  
55  
56  
57  
58  
59  
60

1  
2  
3 lower tertiles exhibited lower levels of burnout (18% vs 35% vs 47%  $p<0.001$ ), and  
4  
5 intent to leave (16% vs 24% vs 50%  $p<0.001$ ).  
6

7  
8 **Conclusion:** Perceived leadership behaviors have a strong relationship with burnout,  
9  
10 professional fulfillment, and intent to leave among physicians. Organizations should  
11  
12 consider leadership development as a potential vehicle to improve physician wellness  
13  
14 and prevent costly physician departures.  
15

16  
17  
18  
19 Abstract word count: 290  
20

21  
22  
23  
24 Keywords: burnout, leadership, gender, professional fulfillment  
25  
26  
27  
28

### 29 **Strengths and Limitations of this Study:**

- 30  
31 • First multi-center survey that analyzed the effect of supervisor leadership  
32  
33 behaviors on physician wellbeing, professional fulfillment and intent to leave.  
34  
35
- 36  
37 • Leadership was evaluated by 5416 physicians representing at least 12  
38  
39 specialties from eleven healthcare organizations.  
40
- 41  
42 • Validated instruments were used to assess burnout, professional fulfillment and  
43  
44 leadership behavior.  
45
- 46  
47 • Response rate of 45%, although relatively high for a physician survey, may still  
48  
49 contribute to selection bias.  
50
- 51  
52 • Respondents are from member institutions of the Physician Wellness Academic  
53  
54 Consortium (PWAC), which may limit generalizability.  
55  
56  
57  
58  
59  
60



## INTRODUCTION

As the landscape of modern medicine continues to grow and change, physicians are increasingly becoming employed by large organizations.<sup>1</sup> Solo or small practices are becoming less common, and up to two thirds of physicians are now employed by large practice groups and 20% of physicians employed by a practice of greater than 100 physicians.<sup>2</sup> The trend to group medicine exists beyond the boundaries of academic medicine or private practice, including university hospitals, health maintenance organizations, practice groups, and health systems.

Healthcare organizations have increasingly recognized the impact of occupational burnout and physician well-being on their ability to provide high quality healthcare to their communities.<sup>3</sup> The components of burnout include emotional exhaustion (EE), depersonalization, and decreased personal efficacy in the context of the work environment.<sup>4</sup> Concern for physician burnout has gained increasing attention given its implications for patient and provider health. Burnout has previously been associated with worse quality of care,<sup>5-7</sup> physician attrition,<sup>8-10</sup> patient satisfaction,<sup>11-13</sup> cost of care,<sup>3,14-15</sup> and medical errors.<sup>6,16-17</sup> Institutional factors involved in burnout and professional fulfillment act as modifiable factors that can be targeted by organizations.<sup>18-</sup>

23

The impact of leadership effectiveness on burnout and workplace satisfaction for physicians is of importance for healthcare organizations.<sup>24-26</sup> A study of 2800 physicians

1  
2  
3 at the Mayo Clinic demonstrated that average leadership behavior score of physicians'  
4 work unit supervisor explained 11% of the variation in burnout and 47% of the variation  
5 in workplace satisfaction across 129 work units when adjusted for other factors.<sup>24</sup> The  
6 leadership behaviors of physicians immediate supervisor have also been found to have  
7 a strong impact on physicians' perception of values alignment with their organization as  
8 a whole.<sup>26</sup> Healthcare leaders face many challenges, balancing costs with ever  
9 changing reimbursements, managing personnel, and addressing dynamic quality  
10 metrics.<sup>27</sup> However, physician training is largely focused on the individual, with an  
11 emphasis on clinical care of patients. Developing leadership skills in physician  
12 supervisors, organizations can make a large impact in the wellbeing of their clinicians  
13 and foster better patient care.<sup>18, 25,28-29</sup> Additionally, by understanding and targeting  
14 leadership, organizations can impact a large number of healthcare professionals and  
15 teams under each leader's supervision. We sought to further evaluate the factors  
16 involved in physician burnout by understanding the relationship between leadership,  
17 burnout, profession fulfillment, and intent to leave.

## 41 METHODS:

42  
43  
44 A cross sectional study of attending physicians in the United States was performed at  
45 eleven healthcare organizations participating in the Physician Wellness Academic  
46 Consortium (PWAC-<https://wellbeingconsortium.org>). A standardized survey was  
47 administered at participating institutions to be distributed to physicians from all available  
48 departments. A total of 12036 attending and resident physicians across 11 institutions  
49 were surveyed between November 2016 and October 2018 as part of their membership

1  
2  
3 in the Physician Wellness Academic Consortium. Among these, 5795 attendings  
4 completed evaluation of their supervisor using the 9-item version of the Mayo Clinic  
5 Participatory Management Leadership Index. Resident physician data and incomplete  
6 data from attending physicians on gender, specialty, leadership rating scale, burnout or  
7 professional fulfillment were excluded. The dataset was de-identified by a third-party  
8 administrator prior to analysis.  
9  
10  
11  
12  
13  
14  
15

### 16 Patient and Public Involvement

17 Patients or the public were not involved in the design, conduct or reporting of the study.  
18  
19 Given that this was an anonymous deidentified study, the results will be disseminated  
20 by publication of this study without direct contact to participants.  
21  
22  
23  
24  
25  
26  
27  
28  
29  
30

### 31 Measures

32 Supervisor Leadership Behavior Score: Participants were asked to evaluate their leader  
33 using the organizational leadership subscale based on the revised 9-item Mayo Clinic  
34 Participatory Management Leadership Index (included in the Appendix, used with  
35 permission from Mayo Clinic).<sup>25</sup> This instrument was designed to evaluate leadership  
36 behaviors associated with team member engagement, including dimensions related to  
37 inclusion (treating everyone with respect), keeping people informed, soliciting input,  
38 empowering team members, nurturing professional development, and providing  
39 feedback and recognition. Each item is scored on a 5-point scale (0-4) and the scores  
40 from the individual items are summed to compute an aggregate score (with higher  
41 scores indicating more favorable ratings). The total score was then categorized into  
42  
43  
44  
45  
46  
47  
48  
49  
50  
51  
52  
53  
54  
55  
56  
57  
58  
59  
60

1  
2  
3 tertiles to represent groups of participants' leadership scores in increasing order  
4  
5 towards more favorable evaluations.  
6  
7

8 *Professional Fulfillment Index*: The PFI was used to measure professional fulfillment  
9 and burnout. The PFI includes 6 items for the assessment of professional fulfillment, 4  
10 items for the assessment of work exhaustion and 6 items to assess interpersonal  
11 disengagement. The burnout score represents the mean of 10 work exhaustion and  
12 interpersonal disengagement items, scored on a Likert scale from 0 (not at all) to 4  
13 (extremely), where 4 indicates the highest burnout score. The professional fulfillment  
14 scale assesses the degree of intrinsic positive reward the individual derives from their  
15 work, including happiness, meaningfulness, contribution, self-worth, satisfaction, and  
16 feeling in control when dealing with difficult problems at work. Items are measured on a  
17 five-point Likert scale from 0 (not at all true) to 4 (completely true). The mean score  
18 represents the mean of all 6 items and ranges between 0 and 4. Burnout score and  
19 professional fulfillment scores were rescaled to be between 0 and 10 to make  
20 interpretations simpler and consistent with recent reports.<sup>25-26,30</sup> Based on the published  
21 validation studies,<sup>31-32</sup> the established thresholds for burnout and professional fulfillment  
22 on the 0-10 scales are  $\geq 3.25$  and  $\geq 7.5$  respectively.  
23  
24  
25  
26  
27  
28  
29  
30  
31  
32  
33  
34  
35  
36  
37  
38  
39  
40  
41  
42

43 *Intent to Leave*: Participants were asked if they intended to leave their institution within  
44 two years (*What is the likelihood that you will leave your institution within two years?*).  
45 The response choices were none, slight, moderate, likely, and definitely. The responses  
46 were then collapsed to form a binary variable (0=none, 1 otherwise) indicating that the  
47 participants have at least "slight" likelihood of leaving.  
48  
49  
50  
51  
52  
53  
54

## 55 **Statistical Analyses**

56  
57  
58  
59  
60

1  
2  
3 Data were summarized for the overall sample (Table 1) and by tertiles of the leadership  
4 behavior score using frequencies and percentages for categorical variables (Table 2).  
5  
6 The association between leadership behavior score and variables of interests were  
7 statistically tested using Chi-square and trend tests presented in Table 2. Kramer's V  
8 statistic was included in Table 2 to show the degree of associations between categorical  
9 variables. Linear associations between continuous variables and leadership ratings  
10 were examined using correlation coefficients. Internal validity of the organizational  
11 leadership scale was assessed using Cronbach's alpha. Multivariable logistic regression  
12 analyses were conducted to examine the association between the leadership behavior  
13 score of each physician's supervisor and burnout and intent to leave controlling for  
14 gender, professional fulfillment and specialty. The correlation within specialty groups  
15 was accounted for using clustering at specialty level (logistic command with cluster  
16 option in Stata 15). Estimated odds ratios with 95% confidence intervals and p-values  
17 were presented in Table 3. Predictive margins over leadership scale tertiles were  
18 computed based on the logistic regression models for male and female physicians and  
19 presented in Figures 1-3. All statistical analyses were conducted in Stata 15. A p-value  
20 of <.05 was considered statistically significant.  
21  
22  
23  
24  
25  
26  
27  
28  
29  
30  
31  
32  
33  
34  
35  
36  
37  
38  
39  
40  
41  
42  
43  
44  
45  
46

## 47 RESULTS

48  
49 The overall attending physician response rate for the PWAC survey was 45%. Fully  
50 completed surveys from 5416 attending physicians were included in the analysis. The  
51 personal and professional characteristics of responders are shown in Table 1.  
52  
53  
54  
55  
56  
57  
58  
59  
60

1  
2  
3 Table 2 presents data on the relationships between specialty distribution, burnout,  
4 professional fulfillment and intent to leave by the tertiles of the scores on the  
5 Participatory Management Leadership Index, which showed high internal consistency  
6 (Cronbach's alpha=0.95) in this sample.  
7  
8  
9  
10  
11

12  
13 Female physicians represented 50% (2710/5416) of all participants. The percentage of  
14 female physicians who rated their immediate supervisor in the highest tertile of the  
15 leaderships scale was significantly lower than male physicians (28% vs 33%  $p<0.001$ ).  
16  
17 Male physicians rated their leaders more favorably compared to female physicians (2.8  
18 (1.0) vs 2.6 (1.0),  $p<0.001$ ). By specialty, Dermatologists (56%) and Pathologists (41%)  
19 had the highest proportion who rated their immediate supervisor in the highest tertile of  
20 the leadership behavior. In contrast, Ob-Gyn specialists (40%), Anesthesiologists  
21 (38%) and Internal Medicine physicians (31%) were least likely to rate their immediate  
22 supervisor in the highest tertile of the leaderships scale.  
23  
24  
25  
26  
27  
28  
29  
30  
31  
32  
33

34 The leadership behavior rating of each physician's supervisor was negatively  
35 associated with burnout score ( $r=-0.34$ ,  $p<0.001$ ) and positively associated with  
36 professional fulfillment score ( $r=0.44$ ,  $p<0.001$ ). There was a significant positive  
37 association between professional fulfillment and leadership behavior score. Mean  
38 professional fulfillments scores (4.6, 4.4, 4.0,  $p<0.001$ ) and the percentage of those with  
39 professional fulfillment were higher at higher tertiles of leadership behavior scores  
40 (lowest tertile: 19%, middle tertile: 34% and highest tertile: 47%, Kramer's V:0.33;  
41  
42  
43  
44  
45  
46  
47  
48  
49  
50  
51  
52  
53  
54  
55  
56  
57  
58  
59  
60

61 The mean burnout score (3.7, 3.0, 2.2,  $p<0.001$ ) and percentage of  
62 physicians who had a high burnout score decreased with increasing tertiles of  
63 leadership behavior score (47%, 35% and 18%, Kramer's V:0.26,  $p<0.001$ ). Similarly,

1  
2  
3 the percentage of those who reported an intent to leave their institution in the next two  
4  
5 years decreased with increasing tertiles of leadership behavior score (50%, 34% and  
6  
7 16%, Kramer's V:0.27,  $p<0.001$ ).  
8  
9

10  
11  
12  
13 Table 3 presents multivariable logistic regression models of professional fulfillment  
14 (Model 1), burnout status (Model 2) and intent to leave (Model 3) in relation to  
15  
16 leadership behavior rating of physician's supervisor. The strong association between  
17  
18 professional fulfillment and leadership behavior score is demonstrated in Model 1.  
19  
20  
21 Physicians who have more favorable evaluations of their leaders were more likely to be  
22  
23 in the professionally fulfilled category. Specifically, the odds of having high professional  
24  
25 fulfillment increased by a factor of 2.1 for those who rated their leader in the second  
26  
27 tertile compared to those in the lowest tertile (OR:2.10, 95% CI: 1.85-2.37) while the  
28  
29 odds increased by a factor of 5.8 for those who are in the top tertile compared to those  
30  
31 in the lowest tertile (OR:5.80, 95% CI:5.10-6.59, AUC 0.71). This model also  
32  
33 demonstrates that female physicians were significantly less likely to have high  
34  
35 professional fulfillment after adjusting for specialty, and supervisor leadership behavior  
36  
37 rating (OR:0.58, 95% CI: 0.51-0.66). Figure 1 illustrates the likelihood of having  
38  
39 professional fulfillment for each leadership behavior tertile of physician's supervisor for  
40  
41 female and male physicians based on the predicted probabilities obtained from Model 1.  
42  
43  
44 Non-overlapping confidence intervals at each tertile show that the difference between  
45  
46 gender groups is maintained across tertiles suggesting that the association between of  
47  
48 leadership score on professional fulfillment is not dependent on gender. This is  
49  
50  
51  
52  
53  
54  
55  
56  
57  
58  
59  
60

1  
2  
3 evidenced by non-significant interaction effects between gender and leadership  
4 behavior score tertiles in Model 1 when interaction terms are included.  
5  
6

7  
8 The relationship between organizational leadership and physician burnout is assessed  
9 in Model 2, which is adjusted by gender, specialty and professional fulfillment.  
10

11  
12 Physicians who rated the leader behavior of their supervisor in the second tertile were  
13 48% less likely to be burned out compared to those who are in the first tertile (OR:0.52,  
14 95% CI:0.45-0.61); those who are in the top tertile of leadership behavior score were  
15 74% less likely to be burned out compared to those who are in the first tertile (OR:0.26,  
16 95% CI:0.23-0.31). Model 2 also showed that the odds of reporting burnout are 57%  
17 higher for female physicians (OR:1.57 95% CI: 1.41-1.76, AUC 0.77). The likelihood of  
18 burnout derived from Model 2 by the tertiles of leadership behavior score is illustrated  
19 for male and female physicians in Figure 2. The gender differences in burnout by  
20 increasing tertiles of leadership behavior score remained similar across tertiles indicated  
21 by non-overlapping confidence intervals at each tertile and non-significant interactions  
22 between gender and leadership behavior score tertiles in Model 2.  
23  
24  
25  
26  
27  
28  
29  
30  
31  
32  
33  
34  
35  
36  
37  
38  
39  
40  
41

42 Model 3 estimates the effect of leadership behavior rating of each physician's  
43 supervisor on the likelihood that a physician intent to leave their institution within the  
44 next two years. This model is adjusted by gender, specialty, burnout and professional  
45 fulfillment status as potential confounders of intent to leave. Physicians who rated the  
46 leader behavior of their supervisor in the second tertile were 44% less likely to report an  
47 intent to leave compared to those who were in the first tertile (OR:0.56, 95% CI:0.48-  
48 0.65); those who were in the top tertile of supervisor leadership behavior score are 66%  
49  
50  
51  
52  
53  
54  
55  
56  
57  
58  
59  
60



1  
2  
3 less likely to intend to leave compared to those who were in the first tertile (OR:0.34,  
4 95% CI:0.26-0.44). Model 3 also shows that the odds of reporting intent to leave were  
5  
6 30% lower for female physicians (OR:0.70 95% CI: 0.60-0.83) and 54% lower for those  
7  
8 with high professional fulfillment (OR:0.46, 95% CI:0.40-0.52). The area under the ROC  
9  
10 curve for this model is 0.74. The likelihood of having intent to leave for male and female  
11  
12 physicians in this model by the tertiles of supervisor leadership behavior score is shown  
13  
14 in Figure 3. Fifty percent (95% CI: 47-53) of male physicians and 45% (95% CI: 42-48)  
15  
16 of female physicians in the lowest tertile of leadership behavior score reported an intent  
17  
18 to leave in two years compared to 17% of male physicians and 16% of female  
19  
20 physicians in the top tertile. The difference between the gender groups in the top tertile  
21  
22 is significantly narrower compared to that in the lower tertile evidenced by a statistically  
23  
24 significant interaction term (genderXtertile3, OR=0.70, 95% CI: 0.52-0.94, p=0.02) when  
25  
26 interaction terms are included.  
27  
28  
29  
30  
31  
32  
33  
34  
35  
36

## 37 DISCUSSION

38  
39 This multi-institution study demonstrates a strong relationship between leadership  
40  
41 evaluations and burnout, professional fulfillment and intent to leave current organization  
42  
43 among US physicians. These results are consistent with previous single center studies  
44  
45 which have demonstrated the significant impact of leadership quality on healthcare  
46  
47 professional burnout and professional fulfillment.<sup>24-26,33</sup> The association between  
48  
49 leadership and burnout remains strong even when we control for professional fulfillment,  
50  
51 which has a well-established strong inverse relationship with burnout.<sup>34</sup> Although the  
52  
53 present study looks at the correlation between individuals' rating of the leadership  
54  
55  
56  
57  
58  
59  
60

1  
2  
3 behavior of their supervisor and their own well-being and professional fulfillment,  
4  
5 previous studies have also found a strong relationship between the composite  
6  
7 leadership behavior score of a leader (as assessed by all individuals reporting to them)  
8  
9 and the risk of burnout and professional fulfillment for the members of the team as a  
10  
11 whole.<sup>24-26</sup> Leader behavior score also had a strong relationship with intent to leave.  
12  
13  
14 These results are consistent with the notion that physicians who are dissatisfied with  
15  
16 their supervisor' ability to lead the team are the more likely to consider other  
17  
18 opportunities. Prior studies demonstrated physicians who report intent to leave are three  
19  
20 times more likely to leave their institution in the next two years.<sup>8,9,35</sup> This is especially  
21  
22 important as the cost of replacing physicians is significant, and turnover and burnout  
23  
24 can be associated with lower quality and higher cost care for patients.<sup>3,36-40</sup>  
25  
26  
27 Notably, in our study, a lower percentage of female physicians rated the leadership  
28  
29 behaviors of their supervisor in the top tertile and a higher percentage rated the  
30  
31 behaviors of their supervisor in the lowest tertile. Previous studies have indicated  
32  
33 female physicians report greater workplace bullying, harassment, gender  
34  
35 discrimination, and feelings of isolation.<sup>41-49</sup> While female physicians are no longer a  
36  
37 minority in the profession, they are often underrepresented in leadership, potentially due  
38  
39 to inequality and bias in the opportunity for promotion and reward.<sup>7, 41-44, 50</sup> This also  
40  
41 results in fewer female leaders serving as mentors and role models, which may be  
42  
43 protective against burnout.<sup>42, 45-47, 50</sup>  
44  
45  
46  
47  
48  
49

50 Interestingly, in our adjusted analysis controlling for burnout, professional fulfillment,  
51  
52 and the behavior score of their leader, female physicians reported less intent to leave  
53  
54 than male physicians (OR 0.7 CI 0.59-0.83 p<0.001). This is in contrast to prior studies  
55  
56  
57  
58  
59  
60

1  
2  
3 demonstrating a 8-10% higher attrition rate in female physicians.<sup>35, 43,49</sup> These  
4  
5 observations are consistent with the possibility that higher attrition rates among women  
6  
7 physicians may be due to lower satisfaction with their leader and higher rates of  
8  
9 burnout. Because intent to leave describes a longer-term plan to change jobs, it is also  
10  
11 possible that female physicians may leave their jobs more suddenly.  
12  
13

14  
15 Investing in the leadership development of supervising physicians maybe an important  
16  
17 strategy to mitigate burnout and promote professional fulfillment in physicians. An  
18  
19 integrative model of Wellness-Centered Leadership (WCL) incorporating the critical  
20  
21 skills and leadership behaviors that cultivate engagement and professional fulfillment  
22  
23 was recently published.<sup>51</sup> When selecting and developing clinician leaders, the  
24  
25 importance of emotional intelligence, social awareness and team communication should  
26  
27 be considered.<sup>27</sup> These are skills that can be developed in physicians in training,  
28  
29 beginning in medical school and continuing through all phases of training, including  
30  
31 communication, mindfulness and reflection.<sup>18, 52-53</sup> Leaders' own well-being impacts  
32  
33 their leadership effectiveness. One recent study demonstrated that 9.8% of the variation  
34  
35 in a leader's leadership behavior scores as assessed by physicians on their team was  
36  
37 related to their own independently assessed degree of burnout.<sup>25</sup> This observation  
38  
39 suggests that burnout among leaders may result in sub-optimal leadership behavior  
40  
41 which in turn increase the risk of burnout in their team members creating a vicious  
42  
43 cycle. This finding suggest that leadership development initiatives should include  
44  
45 attention to the well-being of the leader in addition to cultivation of specific leadership  
46  
47 skills.<sup>51</sup>  
48  
49  
50  
51  
52  
53  
54  
55  
56  
57  
58  
59  
60

1  
2  
3 Our study has several limitations. First, although relatively high for a physician  
4 survey,<sup>53-56</sup> our response rate was 45%, which raises the potential for selection bias.<sup>57</sup>  
5  
6 Second, the cross-sectional and survey-based design of the study allows us only to assess  
7  
8 associations between leadership evaluations and the outcomes. Third, all physicians  
9  
10 surveyed were from healthcare organizations participating in the PWAC. Although  
11  
12 some PWAC institutions are non-academic institutions, most are academic medical  
13  
14 centers, which makes the generalizability of the results to non-academic settings  
15  
16 unclear. Finally, since the age of the respondent along with gender can help reveal the  
17  
18 identity of the physicians in small specialties, it was not made available for the analyses  
19  
20 and remains a limitation of the study. Our study has several strengths. It is a large  
21  
22 multi-center study of physicians from 11 healthcare organizations representing all  
23  
24 medical specialties with reasonably high response rate, using validated instruments to  
25  
26 assess burnout, professional fulfillment, and leadership behavior.  
27  
28  
29  
30  
31  
32  
33  
34  
35

## 36 CONCLUSION

37  
38  
39  
40

41 The leadership behaviors of physician supervisors have a strong relationship to their  
42  
43 team members' burnout, professional fulfillment, and intent to leave. Female physicians  
44  
45 report lower satisfaction with their leaders' leadership behaviors. Greater attention to  
46  
47 leader selection, development, and performance evaluation represents a potentially  
48  
49 important approach to reducing occupational burnout and promoting professional  
50  
51 fulfillment in large healthcare organizations.  
52  
53  
54  
55  
56  
57  
58  
59  
60

1  
2  
3 **Tables and Figures:**  
4  
5

6 Table 1. Characteristics of the Respondents  
7

8  
9  
10  
11  
12  
13  
14  
15  
16  
17  
18  
19  
20  
21  
22  
23  
24  
25  
26  
27  
28  
29  
30  
31  
32  
33  
34  
35  
36  
37  
38  
39  
40  
41  
42  
43  
44  
45  
46  
47  
48  
49  
50  
51  
52  
53  
54  
55  
56  
57  
58  
59  
60

| Total N=5,416                               | N (%)      |
|---------------------------------------------|------------|
| Gender                                      |            |
| <i>Female</i>                               | 2710 (50)  |
| Male                                        | 2706 (50)  |
| <i>Specialty</i>                            |            |
| Anesthesiology                              | 407 (7.5)  |
| Dermatology                                 | 71 (1.3)   |
| Emergency Medicine                          | 322 (6.0)  |
| Medicine                                    | 1671(30.9) |
| Neurology                                   | 195 (3.6)  |
| OB-GYN                                      | 248 (4.6)  |
| Pathology                                   | 140 (2.6)  |
| Pediatrics                                  | 804 (14.9) |
| Psychiatry                                  | 136 (2.5)  |
| Radiation Oncology                          | 77 (1.4)   |
| Radiology                                   | 317 (5.9)  |
| Surgery                                     | 630 (11.6) |
| Missing Specialty                           | 398 (7.3)  |
| Leadership Behavior Mean Score (0-4) (SD)   | 2.7 (0.7)  |
| <i>Occupational Distress and Well-being</i> |            |
| Professional fulfillment                    |            |
| Mean score (0-10) (SD) <sup>2</sup>         | 6.6 (2.1)  |
| Professional Fulfillment Present (yes)      | 2280 (42)  |

|                                                       |           |
|-------------------------------------------------------|-----------|
| Burnout                                               |           |
| Mean score (0-10) (SD) <sup>1</sup>                   | 3.0 (1.9) |
| Burned Out (yes)                                      | 2174 (40) |
| Intent to Leave Current Organization within Two Years | 1694 (32) |

<sup>1</sup> higher score unfavorable

<sup>2</sup> higher score favorable

For peer review only

Table 2. Characteristics of the Respondents by the Tertiles of Supervisor Leadership Behavior Score (Scores ranked from lowest to highest)

| Total N=5,416      | Tertiles of Leadership Behavior Score <sup>1</sup>     |                                                        |                                                       |                                        |
|--------------------|--------------------------------------------------------|--------------------------------------------------------|-------------------------------------------------------|----------------------------------------|
|                    | Lowest 1/3<br><br>(Low Scores:<br>(0-2.3)<br>N (row %) | Middle 1/3<br>Medium Scores:<br>(2.4-3.2)<br>N (row %) | Highest 1/3<br>High Scores:<br>(3.3-4.0)<br>N (row %) | (Kramer's V)<br>Chi-square-<br>p-value |
| Sex                |                                                        |                                                        |                                                       |                                        |
| Female             | 994 (37)                                               | 972 (36)                                               | 744 (28)                                              | (0.07)<br>(<0.001)                     |
| Male               | 824 (31)                                               | 987 (37)                                               | 895 (33)                                              |                                        |
| Specialty          |                                                        |                                                        |                                                       |                                        |
| Anesthesiology     | 156 (38)                                               | 154 (38)                                               | 97 (24)                                               | (0.11)<br>(<0.001)                     |
| Dermatology        | 10 (14)                                                | 21 (30)                                                | 40 (56)                                               |                                        |
| Emergency Medicine | 66 (21)                                                | 144 (45)                                               | 112 (35)                                              |                                        |
| Medicine           | 625 (37)                                               | 593 (36)                                               | 453 (27)                                              |                                        |
| Neurology          | 51 (26)                                                | 72 (37)                                                | 72 (37)                                               |                                        |
| OB-GYN             | 98 (40)                                                | 83 (34)                                                | 67 (27)                                               |                                        |
| Pathology          | 32 (23)                                                | 51 (36)                                                | 57 (41)                                               |                                        |
| Pediatrics         | 241 (30)                                               | 306 (38)                                               | 257 (32)                                              |                                        |
| Psychiatry         | 43 (32)                                                | 44 (32)                                                | 49 (36)                                               |                                        |

|                                        |           |           |           |                    |
|----------------------------------------|-----------|-----------|-----------|--------------------|
| Radiation Oncology                     | 23 (30)   | 29 (38)   | 25 (33)   |                    |
| Radiology                              | 89 (28)   | 114 (36)  | 114 (36)  |                    |
| Surgery                                | 214 (34)  | 209 (33)  | 207 (33)  |                    |
| Missing Specialty                      | 170 (43)  | 139 (35)  | 89 (22)   |                    |
| Professional Fulfillment               |           |           |           |                    |
| Mean score (0-10) (SD) <sup>3</sup>    | 5.6 (2.1) | 6.7 (1.8) | 7.7 (1.8) | <0.001             |
| Professional Fulfillment Present (yes) | 438 (19)  | 779 (34)  | 1063(47)  | (0.33)<br>(<0.001) |
| Burned Out                             |           |           |           |                    |
| Mean score (0-10) (SD) <sup>2</sup>    | 3.7 (2.0) | 3.0 (1.7) | 2.2 (1.7) | <0.001             |
| Burned Out (yes)                       | 1010(47)  | 766 (35)  | 398 (18)  | (0.26)<br>(<0.001) |
| Intent to Leave (yes)                  | 851 (50)  | 578 (34)  | 265 (16)  | (0.27)<br>(<0.001) |

<sup>1</sup> higher tertile favorable <sup>2</sup> higher score unfavorable

<sup>3</sup> higher score favorable



Table 3. Logistic Regression Models of Professional Fulfillment, Burnout and Intent to Leave

|                                                                    | Model 1<br>Professional<br>Fulfillment (yes)<br><br>N=5416 | Model 2<br>Burnout Status<br>(yes)<br><br>N=5416 | Model 3<br>Intent to Leave<br>(yes)<br><br>N=5374 |
|--------------------------------------------------------------------|------------------------------------------------------------|--------------------------------------------------|---------------------------------------------------|
| Variables                                                          | Odds Ratio<br>(95% CI) (p-val)                             | Odds Ratio<br>(95% CI) (p-val)                   | Odds Ratio<br>(95% CI) (p-val)                    |
| Female vs Male                                                     | 0.58 (0.51-0.66)<br>( $<0.001$ )                           | 1.57 (1.41-<br>1.76)<br>( $<0.001$ )             | 0.70 (0.60-<br>0.83)<br>( $<0.001$ )              |
| <b>Leadership Score</b><br>Tertile 1<br>(Lowest 1/3 of All Scores) | Reference                                                  | Reference                                        | Reference                                         |
| Tertile 2<br>(Middle 1/3 of All Scores)                            | 2.10 (1.85-2.37)<br>( $<0.001$ )                           | 0.52 (0.45-<br>0.61)<br>( $<0.001$ )             | 0.56 (0.48-<br>0.65)<br>( $<0.001$ )              |
| Tertile 3<br>(Highest 1/3 of All scores)                           | 5.80 (5.10-6.59)<br>( $<0.001$ )                           | 0.26 (0.23-<br>0.31)<br>( $<0.001$ )             | 0.34 (0.26-<br>0.44)<br>( $<0.001$ )              |
| Professional Fulfillment<br>Present (yes)                          | -----                                                      | -----                                            | 0.45 (0.40-<br>0.52)<br>( $<0.001$ )              |
| Burned out vs Not                                                  | -----                                                      | -----                                            | 2.43 (2.17-<br>2.71)<br>( $<0.001$ )              |
| Area under the curve<br>(ROC)                                      | 0.71                                                       | 0.66                                             | 0.74                                              |

1  
2  
3 Figure 1. Likelihood (% , 95% CI) of Professional Fulfillment Status by the Tertiles of Supervisor  
4 Leadership Behavior Score for Female and Male Physicians  
5

6  
7  
8 Figure 2. Likelihood (% , 95% CI) of Burnout Status by the Tertiles of Supervisor Leadership  
9 Behavior Score for Female and Male Physicians  
10

11  
12 Figure 3. Likelihood (% , 95% CI) of Reporting Intent to Leave by the Tertiles Supervisor  
13 Leadership Behavior Score for Female and Male Physicians  
14  
15

16  
17  
18  
19  
20  
21  
22 Author Contributions: Dr. Mete had full access to all of the study data provided by  
23 PWAC and take responsibility for the integrity and the accuracy of the data analysis.  
24  
25

26  
27 Concept and design: Marchalik, Mete and Shanafelt.  
28

29  
30 Acquisition, analysis, or interpretation of data: Mete, Marchalik and Shanafelt  
31

32  
33 Drafting of the manuscript: Mete, Goldman  
34

35  
36 Critical revision of the manuscript for important intellectual content: Shanafelt,  
37 Marchalik, Goldman  
38

39  
40 Statistical analysis: Mete.  
41

42  
43 Administrative, technical, or material support: Marchalik, Mete  
44  
45  
46  
47  
48

49  
50 The Corresponding Author has the right to grant on behalf of all authors and does grant  
51 on behalf of all authors, an exclusive license (or non exclusive for government  
52 employees) on a worldwide basis to the BMJ Publishing Group Ltd to permit this article  
53  
54  
55  
56  
57  
58

1  
2  
3 (if accepted) to be published in BMJ editions and any other BMJ PGL products and  
4  
5 sublicences such use and exploit all subsidiary rights, as set out in our license.  
6

7 Ethical Approval: MedStar Health Research Institute Institutional Review Board  
8  
9 approved the study (MHRI-IRB 2028:149)  
10

11  
12 Transparency statement: Mihriye Mete affirms this manuscript is an honest, accurate  
13  
14 and transparent account of the study reports; no aspects have been omitted and all  
15  
16 discrepancies have been explained.  
17

18  
19 Funding information: None  
20

21  
22 Conflict of Interests: Dr. Shanafelt is coinventor of the Mayo Clinic Participatory  
23  
24 Management Leadership Index and Well-being Index Instruments (Physician Well-being  
25  
26 Index, Medical Student Well-being Index, Nurse Well-being Index, Well-being Index).  
27

28  
29 Mayo Clinic holds the copyright to these instruments and has licensed them for use  
30  
31 outside of Mayo Clinic. Dr Shanafelt receives a portion of any royalties paid to Mayo  
32  
33 Clinic. Dr Shanafelt reported receiving honoraria from grand rounds or keynote lecture  
34  
35 presentations and advising for health care organizations outside the submitted work.  
36

37  
38 Other authors report no conflict of interest.  
39

40  
41 Data availability: No additional data related to the analyses of this study are available.  
42  
43  
44  
45  
46  
47  
48  
49  
50  
51  
52  
53  
54  
55  
56  
57  
58  
59  
60

## References

1. Kane, C. Updated data on physician practice arrangements: for the first time, fewer physicians are owners than employees. American Medical Association. *AMA Economic and Health Policy Research*. 2019; 3. <https://www.ama-assn.org/system/files/2019-07/prp-fewer-owners-benchmark-survey-2018.pdf>
2. Hawkins M. Survey of America's physicians: practice patterns and perspectives. [Published online 2016]. <https://www.merritthawkins.com/uploadedFiles/Physicians%20Foundation%202016%20Survey%20of%20Americas%20Physicians.pdf>
3. Shanafelt T, Goh J, Sinsky C. The business case for investing in physician well-being. *JAMA Intern Med*. 2017;177(12):1826-1832. doi:10.1001/jamainternmed.2017.4340
4. Maslach, C. and Jackson, S.E. The measurement of experienced burnout. *J. Organiz. Behav.* 1981; 2: 99-113. <https://doi.org/10.1002/job.4030020205>
5. Tawfik DS, Scheid A, Profit J, et al. Evidence relating health care provider burnout and quality of care: a systematic review and meta-analysis. *Ann Intern Med*. 2019 Oct 15;171(8):555-567. doi: 10.7326/M19-1152. Epub 2019 Oct 8. PMID: 31590181; PMCID: PMC7138707.
6. Shanafelt TD, Balch CM, Bechamps G, et al. Burnout and medical errors among American surgeons. *Ann Surg*. 2010;251(6):995-1000. doi:10.1097/SLA.0b013e3181bfdab3

1  
2  
3 7. Bohman B, Dyrbye L, Sinsky CA. Physician Well-Being: The Reciprocity of Practice  
4 Efficiency, Culture of Wellness, and Personal Resilience. *NJEM Catal*. Published online  
5  
6 2017. Accessed January 20, 2021.

7  
8  
9  
10 [https://catalyst.nejm.org/doi/full/10.1056/CAT.17.0429?casa\\_token=MIYGT-  
11 8qk\\_cAAAAA:1QuLaP1w5Dg6R3KqgMyc5u\\_MsH-y5Wa8Q3Em-  
12 rPqf2R\\_Vx\\_McVKsM3eUijpqCW8PEc6W3WB7rbSM](https://catalyst.nejm.org/doi/full/10.1056/CAT.17.0429?casa_token=MIYGT-8qk_cAAAAA:1QuLaP1w5Dg6R3KqgMyc5u_MsH-y5Wa8Q3Em-rPqf2R_Vx_McVKsM3eUijpqCW8PEc6W3WB7rbSM)

13  
14  
15  
16  
17 8. Hamidi MS, Bohman B, Sandborg C et al. Estimating institutional physician turnover  
18 attributable to self-reported burnout and associated financial burden: a case study. *BMC*  
19  
20 *Health Serv Res*. 2018 Nov 27;18(1):851. doi: 10.1186/s12913-018-3663-z. PMID:  
21  
22 30477483; PMCID: PMC6258170.

23  
24  
25  
26  
27 9. Jackson TN, Percy CP, Khorgami Z, Agrawal V, Taubman KE, Truitt MS. The  
28  
29 Physician Attrition Crisis: A Cross-Sectional Survey of the Risk Factors for Reduced Job  
30  
31 Satisfaction Among US Surgeons. *World J Surg*. 2018;42(5):1285-1292.

32  
33  
34 doi:10.1007/s00268-017-4286-y

35  
36  
37 10. Shanafelt TD, Mungo M, Schmitgen J, et al. Longitudinal study evaluating the  
38  
39 association between physician burnout and changes in professional work effort. *Mayo*  
40  
41 *Clin Proc*. 2016 Apr;91(4):422-31. doi: 10.1016/j.mayocp.2016.02.001. PMID:  
42  
43 27046522.

44  
45  
46 11. Haas JS, Cook EF, Puopolo AL, Burstin HR, Cleary PD, Brennan TA. Is the  
47  
48 professional satisfaction of general internists associated with patient satisfaction? *J Gen*  
49  
50 *Intern Med*. 2000;15(2):122-128. doi:10.1046/j.1525-1497.2000.02219.x

- 1  
2  
3 12. Welle D, Trockel MT, Hamidi MS, et al. Association of occupational distress and  
4 sleep-related impairment in physicians with unsolicited patient complaints. *Mayo Clin*  
5 *Proc.* 2020;95(4):719-726. doi:10.1016/j.mayocp.2019.09.025  
6  
7  
8  
9  
10 13. Windover AK, Martinez K, Mercer MB, Neuendorf K, Boissy A, Rothberg MB.  
11 Correlates and outcomes of physician burnout within a large academic medical  
12 center. *JAMA Intern Med.* 2018;178(6):856-858. doi:10.1001/jamainternmed.2018.0019  
13  
14  
15  
16 14. Han S, Shanafelt TD, Sinsky CA, et al. Estimating the attributable cost of physician  
17 burnout in the United States. *Ann Intern Med.* 2019;170(11):784-790. doi:10.7326/M18-  
18  
19  
20  
21 1422  
22  
23  
24 15. Dyrbye LN, West CP, Hunderfund AL, et al. Relationship between burnout,  
25 professional behaviors, and cost-conscious attitudes among US Physicians. *J Gen*  
26 *Intern Med.* 2020;35(5):1465-1476. doi:10.1007/s11606-019-05376-x  
27  
28  
29  
30  
31 16. West CP, Huschka MM, Novotny PJ, et al. Association of perceived medical errors  
32 with resident distress and empathy: a prospective longitudinal study. *JAMA.*  
33  
34  
35  
36 2006;296(9):1071-1078. doi:10.1001/jama.296.9.1071  
37  
38 17. Menon NK, Shanafelt TD, Sinsky CA, et al. Association of physician burnout with  
39 suicidal ideation and medical errors. *JAMA Netw Open.* 2020;3(12):e2028780.  
40  
41  
42  
43  
44  
45  
46 18. Shanafelt TD, Noseworthy J. Executive leadership and physician well-being: nine  
47 organizational strategies to promote engagement and reduce burnout. Mayo Clinic  
48 proceedings. doi:10.1016/j.mayocp.2016.10.004  
49  
50  
51  
52  
53  
54  
55  
56  
57  
58  
59  
60

1  
2  
3 19. Km A. Physician well-being: organizational strategies for physician burnout. FP  
4 essentials. Published August 2018. Accessed January 20, 2021.

5  
6  
7 <https://pubmed.ncbi.nlm.nih.gov/30107106/>

8  
9  
10 20. Mari S, Meyen R, Kim B. Resident-led organizational initiatives to reduce burnout  
11 and improve wellness. *BMC Med Educ*. 2019;19(1):437. doi:10.1186/s12909-019-1756-

12  
13  
14  
15 y

16  
17  
18 21. DeChant PF, Acs A, Rhee KB, et al. Effect of organization-directed workplace  
19 interventions on physician burnout: a systematic review. *Mayo Clin Proc Innov Qual*  
20  
21  
22  
23 *Outcomes*. 2019;3(4):384-408. doi:10.1016/j.mayocpiqo.2019.07.006

24  
25  
26 22. Shanafelt T, Stolz S, Springer J, Murphy D, Bohman B, Trockel M. A Blueprint for  
27 organizational strategies to promote the well-being of health care professionals. *NEJM*  
28  
29  
30  
31 *Catalyst Innovations in Care Delivery*. 2020 Oct 21;1(6).

32  
33  
34  
35 23. Swensen SJ, Shanafelt TD. Mayo Clinic Strategies to Reduce Burnout: 12 Actions  
36 to Create the Idea Workplace. Oxford University Press; 2020.

37  
38  
39  
40 24. Shanafelt TD, Gorringer G, Menaker R, et al. Impact of organizational leadership on  
41 physician burnout and satisfaction. *Mayo Clin Proc*. 2015;90(4):432-440.

42  
43  
44  
45 doi:10.1016/j.mayocp.2015.01.012

46  
47  
48 25. Shanafelt TD, Makowski MS, Wang H, et al. Association of burnout, professional  
49 fulfillment, and self-care practices of physician leaders with their independently rated  
50 leadership effectiveness. *JAMA Netw Open*. 2020;3(6):e207961.

51  
52  
53  
54  
55 doi:10.1001/jamanetworkopen.2020.7961

- 1  
2  
3 26. Shanafelt TD, Wang H, Leonard M, et al. Assessment of the association of  
4 leadership behaviors of supervising physicians With personal-organizational values  
5 alignment among staff physicians. *JAMA Netw Open*. 2021 Feb 1;4(2):e2035622. doi:  
6 10.1001/jamanetworkopen.2020.35622. PMID: 33560424; PMCID: PMC7873777.  
7  
8 27. Stoller JK. Help wanted: developing clinician leaders. *Perspect Med Educ*.  
9 2014;3(3):233-237. doi:10.1007/s40037-014-0119-y  
10  
11 28. Edelman CM, Boen F, Fransen K. The Power of Empowerment: Predictors and  
12 Benefits of Shared Leadership in Organizations. *Front Psychol*. 2020;11:582894.  
13 doi:10.3389/fpsyg.2020.582894  
14  
15 29. White BAA, Bledsoe C, Hendricks R, Arroliga AC. A leadership education  
16 framework addressing relationship management, burnout, and team trust. *Proc Bayl*  
17 *Univ Med Cent*. 2019;32(2):298-300. doi:10.1080/08998280.2018.1550346  
18  
19 30. Trockel MT, Menon NK, Rowe SG, et al. Assessment of physician sleep and  
20 wellness, burnout, and clinically significant medical errors. *JAMA Netw Open*.  
21 2020;3(12):e2028111. Published 2020 Dec 1.  
22 doi:10.1001/jamanetworkopen.2020.28111  
23  
24 31. Trockel M, Bohman B, Lesure E, et al. A brief instrument to assess both burnout  
25 and professional fulfillment in physicians: reliability and validity, including correlation  
26 with self-reported medical errors, in a sample of resident and practicing physicians.  
27 *Acad Psychiatry*. 2018;42(1):11-24. doi:10.1007/s40596-017-0849-3  
28  
29  
30  
31  
32  
33  
34  
35  
36  
37  
38  
39  
40  
41  
42  
43  
44  
45  
46  
47  
48  
49  
50  
51  
52  
53  
54  
55  
56  
57  
58  
59  
60



- 1  
2  
3 32. Trockel MT, Hamidi MS, Menon NK, et al. Self-valuation: Attending to the Most  
4 Important Instrument in the Practice of Medicine. *Mayo Clin Proc.* 2019;94(10):2022-  
5  
6 2031. doi:10.1016/j.mayocp.2019.04.040  
7  
8  
9  
10  
11 doi:10.1001/jamanetworkopen.2020.28111  
12  
13 33. Dyrbye LN, Major-Elechi B, Hays JT, Fraser CH, Buskirk SJ, West CP. Relationship  
14 between organizational leadership and health care employee burnout and satisfaction.  
15  
16 *Mayo Clin Proc.* 2020;95(4):698-708. doi:10.1016/j.mayocp.2019.10.041  
17  
18  
19  
20  
21 34. Siegel TR, Nagengast AK. Mitigating burnout. *Surg Clin North Am.* 2019;99(5):1029-  
22  
23 1035. doi:10.1016/j.suc.2019.06.015  
24  
25  
26 35. Rittenhouse DR, Mertz E, Keane D, Grumbach K. No exit: an evaluation of  
27 measures of physician attrition. *Health Serv Res.* 2004;39(5):1571-1588.  
28  
29  
30  
31 doi:10.1111/j.1475-6773.2004.00304.x  
32  
33  
34 36. Gill JM, Mainous AG III. The role of provider continuity in preventing hospitalizations.  
35  
36 *Arch Fam Med.* 1998;7(4):352-357.  
37  
38  
39 37. Raddish M, Horn SD, Sharkey PD. Continuity of care: is it cost effective? *Am J*  
40  
41 *Manag Care.* 1999;5(6):727-734.  
42  
43  
44 48. Buchbinder SB, Wilson M, Melick CF, Powe NR. Estimates of costs of primary care  
45 physician turnover. *Am J Manag Care.* 1999;5(11):1431-1438.  
46  
47  
48  
49 39. Misra-Hebert AD, Kay R, Stoller JK. A review of physician turnover: rates, causes,  
50  
51 and consequences. *Am J Med Qual.* 2004;19(2):56-66.  
52  
53  
54  
55  
56  
57  
58  
59  
60

- 1  
2  
3 40. Atkinson W, Misra-Hebert A, Stoller JK. The impact on revenue of physician  
4 turnover: an assessment model and experience in a large healthcare center. *J Med*  
5  
6 *Pract Manage*. 2006;21(6):351-355.  
7  
8  
9  
10  
11 41. Person SD, Jordan CG, Allison JJ, et al. Measuring diversity and inclusion in  
12  
13 academic medicine: the diversity engagement survey (DES). *Acad Med J Assoc Am*  
14  
15 *Med Coll*. 2015;90(12):1675-1683. doi:10.1097/ACM.0000000000000921  
16  
17  
18 42. Tesch BJ, Wood HM, Helwig AL, Nattinger AB. Promotion of women physicians in  
19  
20 academic medicine. Glass ceiling or sticky floor? *JAMA*. 1995;273(13):1022-1025.  
21  
22  
23 43. Frank E, Zhao Z, Sen S, Guille C. Gender Disparities in Work and Parental Status  
24  
25 Among Early Career Physicians. *JAMA Netw Open*. 2019;2(8).  
26  
27  
28 doi:10.1001/jamanetworkopen.2019.8340  
29  
30  
31 44. Mueller CM, Gaudilliere DK, Kin C, Menorca R, Girod S. Gender disparities in  
32  
33 scholarly productivity of US academic surgeons. *J Surg Res*. 2016;203(1):28-33.  
34  
35  
36 doi:10.1016/j.jss.2016.03.060  
37  
38  
39 45. Cochran A, Hauschild T, Elder WB, Neumayer LA, Brasel KJ, Crandall ML.  
40  
41 Perceived gender-based barriers to careers in academic surgery. *Am J Surg*.  
42  
43 2013;206(2):263-268. doi:10.1016/j.amjsurg.2012.07.044  
44  
45  
46 46. Zhuge Y, Kaufman J, Simeone DM, Chen H, Velazquez OC. Is there still a glass  
47  
48 ceiling for women in academic surgery? *Ann Surg*. 2011;253(4):637-643.  
49  
50  
51 doi:10.1097/SLA.0b013e3182111120  
52  
53  
54  
55  
56  
57  
58  
59  
60

- 1  
2  
3 47. Liang R, Dornan T, Nestel D. Why do women leave surgical training? A qualitative  
4 and feminist study. *Lancet*. 2019;393(10171):541-549. doi:10.1016/S0140-  
5  
6 6736(18)32612-6  
7  
8  
9  
10  
11 48. Bingmer K, Wojnarski CM, Brady JT, Stein SL, Ho VP, Steinhagen E. A Model for a  
12 formal mentorship program in surgical residency. *J Surg Res*. 2019;243:64-70.  
13  
14 doi:10.1016/j.jss.2019.04.068  
15  
16  
17  
18 49. Khoushal Z, Hussain MA, Greco E, et al. Prevalence and causes of attrition  
19 among surgical residents: A Systematic Review and Meta-analysis. *JAMA Surg*.  
20  
21 2017;152(3):265-272. doi:10.1001/jamasurg.2016.4086  
22  
23  
24  
25  
26 50. Templeton K, Bernstein CA, Sukhera J, et al. Gender-based differences in burnout:  
27 issues faced by women physicians. *NAM Perspect*. Published online May 30, 2019.  
28  
29 doi:10.31478/201905a  
30  
31  
32  
33 51. Shanafelt T, Trockel M, Rodriguez A, Logan D. Wellness-centered leadership:  
34 equipping health care leaders to cultivate physician well-being and professional  
35 fulfillment. *Acad Med*. 2021;96(5):641-651. doi:10.1097/ACM.0000000000003907  
36  
37  
38  
39  
40 52. Smith, C. D., C. Balatbat, S. Corbridge, et al. Implementing optimal team-based  
41 care to reduce clinician burnout. *NAM Perspectives*. 2018 Discussion Paper, National  
42 Academy of Medicine, Washington, DC. <https://doi.org/10.31478/201809c>  
43  
44  
45  
46  
47  
48 53. Shanafelt T, Swensen S. Leadership and physician burnout: using the annual  
49 review to reduce burnout and promote engagement. *Am J Med Qual*. 2017;32(5):563-  
50  
51 565. doi:10.1177/1062860617691605  
52  
53  
54  
55  
56  
57  
58  
59  
60

1  
2  
3 54. Allegra C, Hall R, Yothers G. Prevalence of burnout in the US oncology community:  
4 results of a 2003 survey. *J Onc Pract.* 2005;1:140-147.  
5  
6

7  
8 55. Kuerer HM, Eberlein TJ, Pollock RE, et al. Career satisfaction, practice patterns and  
9 burnout among surgical oncologists: report on the quality of life of members of the  
10 Society of Surgical Oncology. *Ann Surg Oncol.* 2007;14(11):3043-3053  
11  
12  
13

14  
15 56. Shanafelt TD, Balch CM, Bechamps GJ, et al. Burnout and career satisfaction  
16 among American surgeons. *Annals of Surgery.* 2009;250(3):463-471.  
17  
18  
19

20  
21 57. Asch D, Jedrzejewski M, Christakis N. Response rates to mail surveys published in  
22 medical journals. *J Clin Epidemiol.* 1997;50:1129-1136.  
23  
24  
25  
26  
27  
28  
29  
30  
31  
32  
33  
34  
35  
36  
37  
38  
39  
40  
41  
42  
43  
44  
45  
46  
47  
48  
49  
50  
51  
52  
53  
54  
55  
56  
57  
58  
59  
60

**Figure 1. Predicted Percentage of Physicians (% , 95% CI) with High Professional Fulfillment by the Tertiles of Supervisor Leadership Behavior Ratings for Female and Male Physicians**

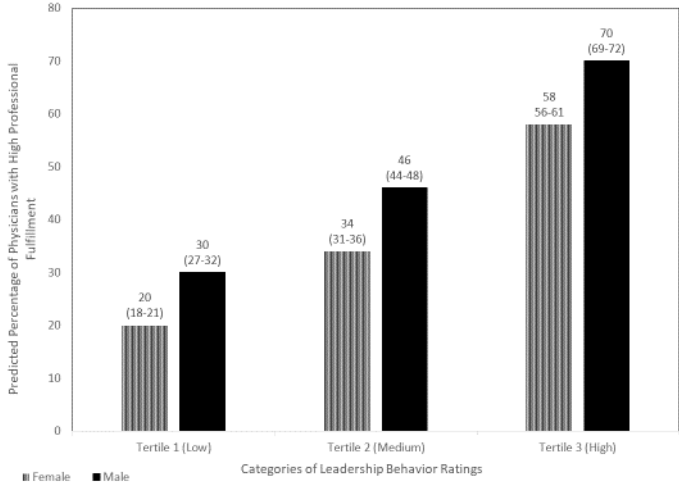

For peer review only

**Figure 2. Predicted Percentage of Physicians (% , 95% CI) with Burnout by the Tertiles of Supervisor Leadership Behavior Ratings for Female and Male Physicians**

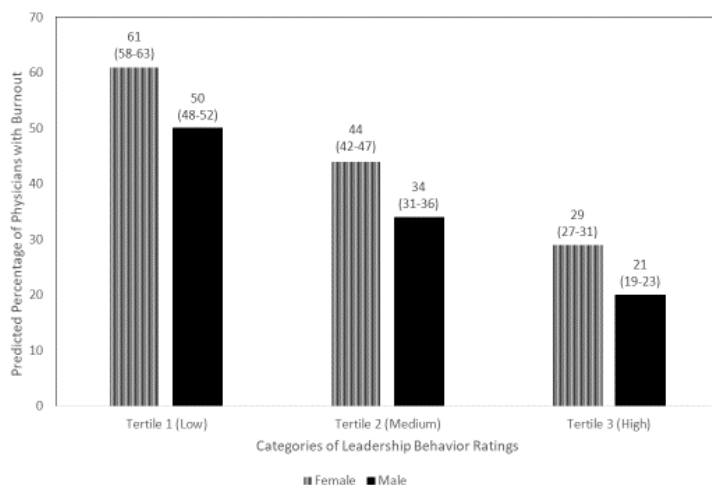

peer review only

**Figure 3. Predicted Percentage of Physicians (% , 95% CI) Reporting Intent to Leave by the Tertiles of Supervisor Leadership Behavior Ratings for Female and Male Physicians**

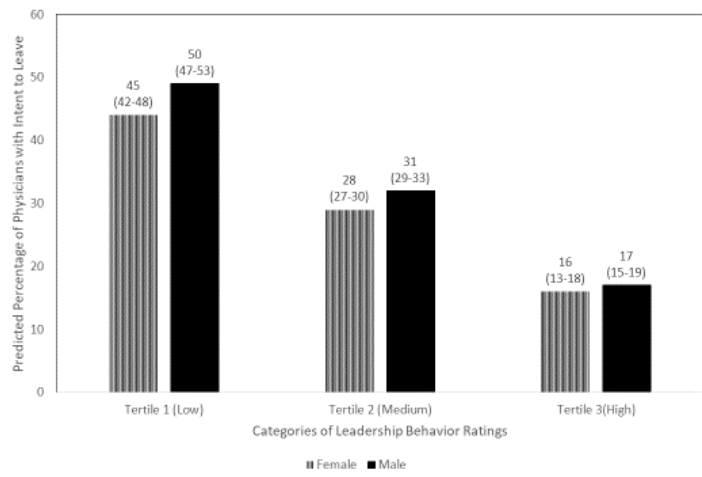

Peer review only

## **Appendix**

### **Revised 9-item Mayo Clinic Participatory Management Leadership Index<sup>1</sup>**

**Please answer the following questions about your experience with the supervisor who is most directly responsible for providing you administrative guidance, feedback, and support.**

**My supervisor...**

1. Holds career development conversations with me
2. Empowers me to do my job
3. Encourages me to suggest ideas for improvement
4. Treats me with respect and dignity
5. Provides helpful feedback and coaching on my performance
6. Recognizes me for a job well done
7. Keeps me informed about changes taking place at (Institution)
8. Encourages me to develop my talents and skills
9. Overall, how satisfied are you with your supervisor?

**Response options:**

**Items 1-8:** 4-strongly agree, 3-agree, 2-neither agree nor disagree, 1-disagree, 0-strongly disagree

**Item 9:** 4-very satisfied, 3-satisfied, 2-neither satisfied nor dissatisfied, 1-dissatisfied, 0-very dissatisfied.

**Scoring:** Each item is scored on a 5-point scale (0-4) and the scores from the individual items are summed to compute an aggregate score (with higher scores indicating more favorable ratings)

1. Copyright Mayo Clinic; used with permission.



STROBE Statement—checklist of items that should be included in reports of observational studies

|                           | Item No. | Recommendation                                                                                                                                                                                                                                                                                                                                                                                                                                                                                                                                                                                                                                                                                       | Page No.     | Relevant text from manuscript |
|---------------------------|----------|------------------------------------------------------------------------------------------------------------------------------------------------------------------------------------------------------------------------------------------------------------------------------------------------------------------------------------------------------------------------------------------------------------------------------------------------------------------------------------------------------------------------------------------------------------------------------------------------------------------------------------------------------------------------------------------------------|--------------|-------------------------------|
| <b>Title and abstract</b> | 1        | (a) Indicate the study’s design with a commonly used term in the title or the abstract                                                                                                                                                                                                                                                                                                                                                                                                                                                                                                                                                                                                               | 1            |                               |
|                           |          | (b) Provide in the abstract an informative and balanced summary of what was done and what was found                                                                                                                                                                                                                                                                                                                                                                                                                                                                                                                                                                                                  | 5            |                               |
| <b>Introduction</b>       |          |                                                                                                                                                                                                                                                                                                                                                                                                                                                                                                                                                                                                                                                                                                      |              |                               |
| Background/rationale      | 2        | Explain the scientific background and rationale for the investigation being reported                                                                                                                                                                                                                                                                                                                                                                                                                                                                                                                                                                                                                 | 7            |                               |
| Objectives                | 3        | State specific objectives, including any prespecified hypotheses                                                                                                                                                                                                                                                                                                                                                                                                                                                                                                                                                                                                                                     | 8            |                               |
| <b>Methods</b>            |          |                                                                                                                                                                                                                                                                                                                                                                                                                                                                                                                                                                                                                                                                                                      |              |                               |
| Study design              | 4        | Present key elements of study design early in the paper                                                                                                                                                                                                                                                                                                                                                                                                                                                                                                                                                                                                                                              | 8            |                               |
| Setting                   | 5        | Describe the setting, locations, and relevant dates, including periods of recruitment, exposure, follow-up, and data collection                                                                                                                                                                                                                                                                                                                                                                                                                                                                                                                                                                      | 8-9          |                               |
| Participants              | 6        | (9) <i>Cohort study</i> —Give the eligibility criteria, and the sources and methods of selection of participants. Describe methods of follow-up<br><i>Case-control study</i> —Give the eligibility criteria, and the sources and methods of case ascertainment and control selection. Give the rationale for the choice of cases and controls<br><i>Cross-sectional study</i> —Give the eligibility criteria, and the sources and methods of selection of participants<br><br>(b) <i>Cohort study</i> —For matched studies, give matching criteria and number of exposed and unexposed<br><i>Case-control study</i> —For matched studies, give matching criteria and the number of controls per case | 8-9          |                               |
| Variables                 | 7        | Clearly define all outcomes, exposures, predictors, potential confounders, and effect modifiers. Give diagnostic criteria, if applicable                                                                                                                                                                                                                                                                                                                                                                                                                                                                                                                                                             | 9-10         |                               |
| Data sources/ measurement | 8*       | For each variable of interest, give sources of data and details of methods of assessment (measurement). Describe comparability of assessment methods if there is more than one group                                                                                                                                                                                                                                                                                                                                                                                                                                                                                                                 | 10           |                               |
| Bias                      | 9        | Describe any efforts to address potential sources of bias                                                                                                                                                                                                                                                                                                                                                                                                                                                                                                                                                                                                                                            | 10-11, 16-18 |                               |
| Study size                | 10       | Explain how the study size was arrived at                                                                                                                                                                                                                                                                                                                                                                                                                                                                                                                                                                                                                                                            | 8-9, 11      |                               |

Continued on next page

|    |                        |     |                                                                                                                                                                                                              |
|----|------------------------|-----|--------------------------------------------------------------------------------------------------------------------------------------------------------------------------------------------------------------|
| 1  |                        |     |                                                                                                                                                                                                              |
| 2  | Quantitative variables | 11  | Explain how quantitative variables were handled in the analyses. If applicable, describe which groupings were chosen and why                                                                                 |
| 3  |                        |     |                                                                                                                                                                                                              |
| 4  | Statistical methods    | 12  | (a) Describe all statistical methods, including those used to control for confounding                                                                                                                        |
| 5  |                        |     | (b) Describe any methods used to examine subgroups and interactions                                                                                                                                          |
| 6  |                        |     | (c) Explain how missing data were addressed                                                                                                                                                                  |
| 7  |                        |     | (d) <i>Cohort study</i> —If applicable, explain how loss to follow-up was addressed                                                                                                                          |
| 8  |                        |     | <i>Case-control study</i> —If applicable, explain how matching of cases and controls was addressed                                                                                                           |
| 9  |                        |     | <i>Cross-sectional study</i> —If applicable, describe analytical methods taking account of sampling strategy (Not applicable)                                                                                |
| 10 |                        |     | (e) Describe any sensitivity analyses (Not applicable)                                                                                                                                                       |
| 11 |                        |     |                                                                                                                                                                                                              |
| 12 |                        |     |                                                                                                                                                                                                              |
| 13 |                        |     |                                                                                                                                                                                                              |
| 14 |                        |     |                                                                                                                                                                                                              |
| 15 | <b>Results</b>         |     |                                                                                                                                                                                                              |
| 16 | Participants           | 13* | (a) Report numbers of individuals at each stage of study—eg numbers potentially eligible, examined for eligibility, confirmed eligible, included in the study, completing follow-up, and analysed            |
| 17 |                        |     | (b) Give reasons for non-participation at each stage                                                                                                                                                         |
| 18 |                        |     | (c) Consider use of a flow diagram                                                                                                                                                                           |
| 19 | Descriptive data       | 14* | (a) Give characteristics of study participants (eg demographic, clinical, social) and information on exposures and potential confounders                                                                     |
| 20 |                        |     | (b) Indicate number of participants with missing data for each variable of interest                                                                                                                          |
| 21 |                        |     | (c) <i>Cohort study</i> —Summarise follow-up time (eg, average and total amount)                                                                                                                             |
| 22 | Outcome data           | 15* | <i>Cohort study</i> —Report numbers of outcome events or summary measures over time                                                                                                                          |
| 23 |                        |     | <i>Case-control study</i> —Report numbers in each exposure category, or summary measures of exposure                                                                                                         |
| 24 |                        |     | <i>Cross-sectional study</i> —Report numbers of outcome events or summary measures                                                                                                                           |
| 25 | Main results           | 16  | (a) Give unadjusted estimates and, if applicable, confounder-adjusted estimates and their precision (eg, 95% confidence interval). Make clear which confounders were adjusted for and why they were included |
| 26 |                        |     | (b) Report category boundaries when continuous variables were categorized                                                                                                                                    |
| 27 |                        |     | (c) If relevant, consider translating estimates of relative risk into absolute risk for a meaningful time period                                                                                             |
| 28 |                        |     |                                                                                                                                                                                                              |
| 29 |                        |     |                                                                                                                                                                                                              |
| 30 |                        |     |                                                                                                                                                                                                              |
| 31 |                        |     |                                                                                                                                                                                                              |
| 32 |                        |     |                                                                                                                                                                                                              |
| 33 |                        |     |                                                                                                                                                                                                              |
| 34 |                        |     |                                                                                                                                                                                                              |
| 35 |                        |     |                                                                                                                                                                                                              |
| 36 |                        |     |                                                                                                                                                                                                              |
| 37 |                        |     |                                                                                                                                                                                                              |
| 38 |                        |     |                                                                                                                                                                                                              |
| 39 |                        |     |                                                                                                                                                                                                              |
| 40 |                        |     |                                                                                                                                                                                                              |
| 41 |                        |     |                                                                                                                                                                                                              |
| 42 |                        |     |                                                                                                                                                                                                              |
| 43 |                        |     |                                                                                                                                                                                                              |
| 44 |                        |     |                                                                                                                                                                                                              |
| 45 |                        |     |                                                                                                                                                                                                              |
| 46 |                        |     |                                                                                                                                                                                                              |

---

separately)

---

Continued on next page

For peer review only

|                          |    |                                                                                                                                                                            |    |
|--------------------------|----|----------------------------------------------------------------------------------------------------------------------------------------------------------------------------|----|
| Other analyses           | 17 | Report other analyses done—eg analyses of subgroups and interactions, and sensitivity analyses                                                                             | 15 |
| <b>Discussion</b>        |    |                                                                                                                                                                            |    |
| Key results              | 18 | Summarise key results with reference to study objectives                                                                                                                   | 16 |
| Limitations              | 19 | Discuss limitations of the study, taking into account sources of potential bias or imprecision. Discuss both direction and magnitude of any potential bias                 | 18 |
| Interpretation           | 20 | Give a cautious overall interpretation of results considering objectives, limitations, multiplicity of analyses, results from similar studies, and other relevant evidence | 17 |
| Generalisability         | 21 | Discuss the generalisability (external validity) of the study results                                                                                                      | 18 |
| <b>Other information</b> |    |                                                                                                                                                                            |    |
| Funding                  | 22 | Give the source of funding and the role of the funders for the present study and, if applicable, for the original study on which the present article is based              | 2  |

\*Give information separately for cases and controls in case-control studies and, if applicable, for exposed and unexposed groups in cohort and cross-sectional studies.

**Note:** An Explanation and Elaboration article discusses each checklist item and gives methodological background and published examples of transparent reporting. The STROBE checklist is best used in conjunction with this article (freely available on the Web sites of PLoS Medicine at <http://www.plosmedicine.org/>, Annals of Internal Medicine at <http://www.annals.org/>, and Epidemiology at <http://www.epidem.com/>). Information on the STROBE Initiative is available at [www.strobe-statement.org](http://www.strobe-statement.org).
